# Supplementary material for: Indigo production identifies hotspots in cytochrome P450 BM3 for diversifying aromatic hydroxylation
Source: Royal Society of Chemistry journal article supplement (doi:10.1039/d4fd00017j), 2024-01-01
Supplement: d4fd00017j1.pdf [file d4fd00017j1.pdf]

## Supplementary Information

### Indigo Production Identifies Hotspots in Cytochrome P450 BM3 for Diversifying Aromatic Hydroxylation

Douglas J. Fansher,<sup>a,b,c,‡</sup> Jonathan N. Besna<sup>b,c,d,‡</sup> and Joelle N. Pelletier<sup>a,b,c,d</sup>

Author Information:

\*Corresponding author: Joelle Pelletier ([joelle.pelletier@umontreal.ca](mailto:joelle.pelletier@umontreal.ca))

<sup>a</sup> Chemistry Department, Université de Montréal, Montreal, QC, Canada

<sup>b</sup> PROTEO, The Québec Network for Research on Protein, Function, Engineering and Applications, Quebec, QC, Canada

<sup>c</sup> CGCC, Center in Green Chemistry and Catalysis, Montreal, QC, Canada

<sup>d</sup> Department of Biochemistry and Molecular Medicine, Université de Montréal, Montreal, QC, Canada

‡Equally contributing (first) authors.

#### Table of contents:

#### Supplementary Tables:

|                                                                                                                                                                                                                                                                 |    |
|-----------------------------------------------------------------------------------------------------------------------------------------------------------------------------------------------------------------------------------------------------------------|----|
| Supplementary Table 1. P450 BM3 variants that accept compounds 1, 2, 3, 4, 5, and 11 as substrates as reported in prior reports.....                                                                                                                            | 4  |
| Supplementary Table 2. Variants, mutations, and phenotypes in the panel of 80 P450 BM3 variants screened for aromatic hydroxylation activity.....                                                                                                               | 5  |
| Supplementary Table 3. Indigo (+) variants reported in the literature.....                                                                                                                                                                                      | 7  |
| Supplementary Table 4. Raw 4-AAP and NADPH rate assays data.....                                                                                                                                                                                                | 9  |
| Supplementary Table 5. Top P450 BM3 variant rankings across all substrates (1-12) combined, according to 4-AAP absorbance results.....                                                                                                                          | 31 |
| Supplementary Table 6. Top P450 BM3 variant rankings across each substrate (1-12), according to 4-AAP absorbance results. <sup>a</sup> .....                                                                                                                    | 32 |
| Supplementary Table 7. Variant rankings for substrates 1-12 according to 4-AAP absorbance results for variant A5 – F87P.....                                                                                                                                    | 33 |
| Supplementary Table 8. Comparison of rank for 4-AAP absorbance results and NADPH consumption rate for reaction of variant A9 (A184K) with substrates 1-12. A high and low rank are highlighted with a green to red gradient.....                                | 33 |
| Supplementary Table 9. P450 BM3 variant enzyme concentration. The concentrations of the P450 variants in the clarified cell lysate (stock concentration) is shown in descending order. Expression was determined at least in duplicate. For wild-type, n=8..... | 33 |
| Supplementary Table 10. Relationship between 4-AAP absorbance assays and reactions conversion with NADPH recycling.....                                                                                                                                         | 37 |

## Supplementary Figures

Supplementary Figure 1. Activity of indigo (+) (blue) and indigo (-) (orange) P450 BM3 variants towards hydroxylation of 2. The conjugation of phenolic products to 4-aminoantipyrine was measured at 485 nm. For clarity, only the variants showing activity are represented. No wild-type P450 BM3 activity was observed with this substrate. Note: A82Q\*= C-terminal His-tag. All experiments were performed in at least duplicate. ....38

Supplementary Figure 2. Activity of indigo (+) (blue) and indigo (-) (orange) P450 BM3 variants towards hydroxylation of 3. The conjugation of phenolic products to 4-aminoantipyrine was measured at 485 nm. For clarity, only the variants showing activity are represented. No wild-type P450 BM3 activity was observed with this substrate. Note: A82Q\*= C-terminal His-tag. All experiments were performed in at least duplicate. ....39

Supplementary Figure 3. Activity of indigo (+) (blue) and indigo (-) (orange) P450 BM3 variants towards hydroxylation of 4. The conjugation of phenolic products to 4-aminoantipyrine was measured at 485 nm. For clarity, only the variants showing activity are represented. No wild-type P450 BM3 activity was observed with this substrate. Note: A82Q\*= C-terminal His-tag. All experiments were performed in at least duplicate. ....40

Supplementary Figure 4. Activity of indigo (+) (blue) and indigo (-) (orange) P450 BM3 variants towards hydroxylation of 5. The conjugation of phenolic products to 4-aminoantipyrine was measured at 485 nm. For clarity, only the variants showing activity are represented. No wild-type P450 BM3 activity was observed with this substrate. Note: A82Q\*= C-terminal His-tag. All experiments were performed in at least duplicate. ....41

Supplementary Figure 5. Activity of indigo (+) (blue) and indigo (-) (orange) P450 BM3 variants towards hydroxylation of 6. The conjugation of phenolic products to 4-aminoantipyrine was measured at 485 nm. For clarity, only the variants showing activity are represented. No wild-type P450 BM3 activity was observed with this substrate. Note: A82Q\*= C-terminal His-tag. All experiments were performed in at least duplicate. ....42

Supplementary Figure 6. Activity of indigo (+) (blue) and indigo (-) (orange) P450 BM3 variants towards hydroxylation of 7. The conjugation of phenolic products to 4-aminoantipyrine was measured at 485 nm. For clarity, only the variants showing activity are represented. Activity of wild-type P450 BM3 is displayed with a red line. Note: A82Q\*= C-terminal His-tag. All experiments were performed in at least duplicate. ....43

Supplementary Figure 7. Activity of indigo (+) (blue) and indigo (-) (orange) P450 BM3 variants towards hydroxylation of 8. The conjugation of phenolic products to 4-aminoantipyrine was measured at 485 nm. For clarity, only the variants showing activity are represented. No wild-type P450 BM3 activity was observed with this substrate. Note: A82Q\*= C-terminal His-tag. All experiments were performed in at least duplicate. ....44

Supplementary Figure 8. Activity of indigo (+) (blue) and indigo (-) (orange) P450 BM3 variants towards hydroxylation of 9. The conjugation of phenolic products to 4-aminoantipyrine was measured at 485 nm. For clarity, only the variants showing activity are represented. No wild-type P450 BM3 activity was observed with this substrate. Note: A82Q\*= C-terminal His-tag. All experiments were performed in at least duplicate. ....45

Supplementary Figure 9. Activity of indigo (+) (blue) and indigo (-) (orange) P450 BM3 variants towards hydroxylation of 10. The conjugation of phenolic products to 4-aminoantipyrine was measured at 485 nm. For clarity, only the variants showing activity are represented. No wild-type P450 BM3 activity was observed with this substrate. Note: A82Q\*= C-terminal His-tag. All experiments were performed in at least duplicate. ....46

Supplementary Figure 10. Activity of indigo (+) (blue) and indigo (-) (orange) P450 BM3 variants towards hydroxylation of 11. The conjugation of phenolic products to 4-aminoantipyrine was measured at 485 nm. For clarity, only the variants showing activity are represented. Activity of wild-type P450 BM3 is displayed with a red line. Note: A82Q\*= C-terminal His-tag. All experiments were performed in at least duplicate. ....47

Supplementary Figure 11. Activity of indigo (+) (blue) and indigo (-) (orange) P450 BM3 variants towards hydroxylation of 12. The conjugation of phenolic products to 4-aminoantipyrine was measured at 485 nm. For clarity, only the variants showing activity are represented. Activity of wild-type P450 BM3 is displayed with a red line. Note: A82Q\*= C-terminal His-tag. All experiments were performed in at least duplicate. ....48

Supplementary Figure 12. Box plot comparing product formation measured at 485 nm, after 4-AAP conjugation, using indigo (+) variants (blue) and indigo (-) variants (orange). Mean absorbance values for each are displayed with an "X". Balls colored according to either category represent "top" variants as determined by the 4-AAP assay. All experiments were performed at least in duplicate. Wild-type activity is represented with a star (red). ....49

Supplementary Figure 13. Aromatic hydroxylation activity of indigo (+) and indigo (-) P450 BM3 variants as reported with the 4-AAP assay. Activity of P450 BM3 variants towards substituted benzenes (substrates 1-12) is given as absorbance at 485 nm. Average absorbance values for each are displayed with an "X". Balls colored according to either category represent "top" variants as determined by the 4-AAP assay. All experiments were performed at least in duplicate. Wild-type activity is represented with a star (red). .....50

Supplementary Figure 14. Aromatic hydroxylation activity and ranked-based analysis of substrate selective P450 BM3 variants. (A) Aromatic hydroxylation activity of representative P450 BM3 variants that are selective for certain substrates. Mean absorbance values for each substrate are displayed with a black "X". Wild-type activity is represented with a red "X". Variants L75H, R255P, I285F, F87P/A180M/I263G, F81Y/E143D/A180M/M212K, and F81R/F87L/M177L all display a preference for certain substrates and are represented with purple, pink, green, red, dark blue and light blue lines, respectively. (B) Ranked based analysis of variants with enhanced substrate selectivity. The values in each row represent the activity rank for each variant with the respective substrates. Outliers, which represent a higher rank (lower number) are represented as shaded green boxes. These boxes demonstrate which substrate each variant is more selective for. Note: when comparing ranks for each substrate (column under each substrate) there may be number duplication, and this represents a ranking tie between two variants. ....51

Supplementary Figure 15. NADPH consumption of indigo (+) (blue) and indigo (-) (orange) P450 BM3 variants measured during activity assay. NADPH consumption rates of P450 BM3 variants towards substituted benzenes (substrates 1-12) is given as rate ( $\mu\text{M}/\text{min}$ ) calculated from absorbance at 340 nm over 87 seconds. Average absorbance values for each are displayed with an "X". Balls colored according to either category represent "top" variants. All experiments were performed at least in duplicate. Wild-type consumption rate is represented with a star (red).....52

Supplementary Figure 16. Enzyme concentration of indigo (+) (blue) or indigo (-) (orange) P450 BM3 variants. ....53

Supplementary Figure 17. Calibration curves of 1,3-dichlorobenzene (12) (A), 3,5-dichlorophenol (12a) (B), 2,4-dichlorophenol (12b) (C) and 2,6-dichlorophenol (12c)(D). Calibration curves were prepared by LC-MS injection of known concentrations and integration of peaks at 214.4 nm. Integration values were plotted against concentration to generate calibration curves. ....54

**Supplementary Table 1.** P450 BM3 variants that accept compounds 1, 2, 3, 4, 5, and 11 as substrates as reported in prior reports.

| Compound                                                                                             |                                                              |                                                                |                                                                          |                                                         |                                    |                                    |                                    |                                    |                                    |                                    |
|------------------------------------------------------------------------------------------------------|--------------------------------------------------------------|----------------------------------------------------------------|--------------------------------------------------------------------------|---------------------------------------------------------|------------------------------------|------------------------------------|------------------------------------|------------------------------------|------------------------------------|------------------------------------|
| 1                                                                                                    | 2                                                            | 3                                                              | 4                                                                        | 5                                                       | 11                                 |                                    |                                    |                                    |                                    |                                    |
| F87A/<br>H171L<br>/A184I<br>/Q307<br>H/N31<br>9Y/A3<br>28I <sup>1</sup>                              | Wt <sup>2-6</sup>                                            | Wt <sup>7-10</sup>                                             | Wt <sup>11</sup>                                                         | Wt <sup>4</sup>                                         | Wt <sup>2</sup>                    | A74C <sup>12</sup>                 | A74D <sup>12</sup>                 | A74E <sup>12</sup>                 | A74F <sup>12</sup>                 | A74G <sup>12</sup>                 |
| R47L/<br>Y51F/I<br>263A/<br>E267V<br>/I401P<br>1                                                     | R47S/<br>Y51W/<br>I401M <sup>4</sup><br>, <sup>13</sup>      | T268E<br><sup>9</sup>                                          | A191T<br>/N239<br>H/I259<br>V/A27<br>6T/L3<br>53I <sup>11</sup>          | R47S/<br>Y51W/<br>I401M <sup>4</sup><br>, <sup>13</sup> | A74I <sup>12</sup>                 | A74L <sup>12</sup>                 | A74M <sup>1</sup><br><sub>2</sub>  | A74P <sup>12</sup>                 | A74Q <sup>12</sup>                 | A74S <sup>12</sup>                 |
| R47L/<br>Y51F/<br>A184I/<br>A191T<br>/N239<br>H/I259<br>V/A27<br>6T/A3<br>30P/L<br>353I <sup>1</sup> | R47L/<br>Y51F/I<br>401P <sup>3</sup> ,<br><sub>6</sub>       | R47L/<br>Y51F/I<br>401P <sup>7</sup>                           | F87A/<br>A191T<br>/N239<br>H/I259<br>V/A27<br>6T/L3<br>53I <sup>11</sup> |                                                         | A74T <sup>12</sup>                 | A74V <sup>12</sup>                 | A74W <sup>1</sup><br><sub>2</sub>  | L75A <sup>12</sup>                 | L75C <sup>12</sup>                 | L75F <sup>12</sup>                 |
| R47L/<br>Y51F/<br>A191T<br>/N239<br>H/I259<br>V/A27<br>6T/L3<br>53I <sup>1</sup>                     | R47L/<br>Y51F/<br>H171L<br>/Q307<br>H/N31<br>9Y <sup>6</sup> | R47S/<br>Y51W/<br>I401M <sup>4</sup>                           | F87L/<br>A191T<br>/N239<br>H/I259<br>V/A27<br>6T/L3<br>53I <sup>11</sup> |                                                         | L75G <sup>12</sup>                 | L75H <sup>12</sup>                 | L75I <sup>12</sup><br><sub>2</sub> | L75M <sup>1</sup><br><sub>2</sub>  | L75S <sup>12</sup>                 | L75T <sup>12</sup>                 |
| R47L/<br>Y51F/<br>A191T<br>/N239<br>H/I259<br>V/A27<br>6T/L3<br>53I/I4<br>01P <sup>1</sup>           | R47L/<br>Y51F/<br>A330P<br><sup>2,3,6</sup>                  | F87A/<br>A330P<br>/E377<br>A/D42<br>5N <sup>14</sup>           |                                                                          |                                                         | L75Y <sup>12</sup>                 | I263A <sup>1</sup><br><sub>2</sub> | I263C <sup>1</sup><br><sub>2</sub> | I263D <sup>1</sup><br><sub>2</sub> | I263E <sup>1</sup><br><sub>2</sub> | I263G <sup>1</sup><br><sub>2</sub> |
| R47L/<br>Y51F/I<br>401P <sup>1</sup>                                                                 | R47L/<br>Y51F/<br>A330P<br>/I401P<br><sub>3</sub>            | A191T<br>/N239<br>H/I259<br>V/A27<br>6T/L3<br>53I <sup>7</sup> |                                                                          |                                                         | I263H <sup>1</sup><br><sub>2</sub> | I263N <sup>1</sup><br><sub>2</sub> | I263P <sup>1</sup><br><sub>2</sub> | I263Q <sup>1</sup><br><sub>2</sub> | I263S <sup>1</sup><br><sub>2</sub> | I263T <sup>1</sup><br><sub>2</sub> |
|                                                                                                      | I401P <sup>3</sup>                                           | R47L/<br>Y51F/<br>H171L<br>/Q307                               |                                                                          |                                                         | I263T <sup>1</sup><br><sub>2</sub> | P329A<br><sub>12</sub>             | A330C<br><sub>12</sub>             | A330D<br><sub>12</sub>             | A330E<br><sub>12</sub>             | A330F<br><sub>12</sub>             |

|  |                                                                    |                             |  |  |                         |                         |                              |                              |                                                     |                                                     |
|--|--------------------------------------------------------------------|-----------------------------|--|--|-------------------------|-------------------------|------------------------------|------------------------------|-----------------------------------------------------|-----------------------------------------------------|
|  |                                                                    | H/N31<br>9Y <sup>7,10</sup> |  |  |                         |                         |                              |                              |                                                     |                                                     |
|  | F87A/<br>A330P<br>/E377<br>A/D42<br>5N <sup>2</sup>                |                             |  |  | A330G<br>12             | A330H<br>12             | A330I <sup>1</sup><br>2      | A330K<br>12                  | A330L<br>12                                         | A330M<br>12                                         |
|  | A330P<br>2,3                                                       |                             |  |  | A330N<br>12             | A330P<br>2              | A330P<br>12,14               | A330Q<br>12                  | A330S <sup>1</sup><br>2                             | A330T<br>12                                         |
|  | A191T<br>/N239<br>H/I259<br>V/A27<br>6T/L3<br>53I <sup>2,5,6</sup> |                             |  |  | A330V<br>12             | A330<br>W <sup>12</sup> | A330Y<br>12                  | M354C<br>12                  | M354D<br>12                                         | M354E<br>12                                         |
|  |                                                                    |                             |  |  | M354F<br>12             | M354G<br>12             | M354H<br>12                  | M354I <sup>1</sup><br>2      | M354L<br>12                                         | M354Q<br>12                                         |
|  |                                                                    |                             |  |  | L437A<br>12             | L437C <sup>1</sup><br>2 | L437F <sup>1</sup><br>2      | L437G <sup>1</sup><br>2      | L437I <sup>1</sup><br>2                             | L437M<br>12                                         |
|  |                                                                    |                             |  |  | L437V <sup>1</sup><br>2 | L437Y <sup>1</sup><br>2 | R47L/<br>Y51F/<br>A330P<br>2 | A74G/<br>F87V/<br>L188Q<br>2 | F87A/<br>H171L<br>/Q307<br>H/N31<br>9Y <sup>2</sup> | F87A/<br>A330P<br>/E377<br>A/D42<br>5N <sup>2</sup> |

**Supplementary Table 2.** Variants, mutations, and phenotypes in the panel of 80 P450 BM3 variants screened for aromatic hydroxylation activity.

| Variant | Phenotype | Variant Identity                   |
|---------|-----------|------------------------------------|
| A1      | Blue      | R255G                              |
| A2      | Blue      | F81R                               |
| A3      | Blue      | A82E                               |
| A4      | Blue      | A82Q                               |
| A5      | Blue      | F87P                               |
| A6      | Blue      | A180F                              |
| A7      | Blue      | A180M                              |
| A9      | Blue      | A184K                              |
| A10     | Blue      | M212K                              |
| A11     | Blue      | M212W                              |
| A12     | Blue      | R255P                              |
| B1      | Blue      | L75H                               |
| B2      | Blue      | I263G                              |
| B3      | Blue      | I263Q                              |
| B4      | Blue      | A180E/A184F/M212K/I263S            |
| B5      | Blue      | A82Q/M177P/L181F/T256H             |
| B6      | Blue      | I259P                              |
| B7      | Blue      | M177H/I259K                        |
| B8      | Blue      | F87L/M177H/L181I/R255T/I259G/I263N |
| B9      | Blue      | F81R/A82F/F87L/L181F               |

|     |       |                                   |
|-----|-------|-----------------------------------|
| B10 | Blue  | F81Y/E143D/A180M/M212K            |
| B11 | Blue  | F173E/A180F/M212R/I263G           |
| B12 | Blue  | F87L/L181P/I259P                  |
| C1  | Blue  | F87P/A180M/I263G                  |
| C2  | Blue  | F87G                              |
| C3  | Blue  | F87L/M177L/A184K/Y256V            |
| C4  | Blue  | F87P/M212W/Y256H                  |
| C5  | Blue  | F87G/A184P/M212W/R255I/I263Q      |
| C6  | Blue  | M177Q                             |
| C7  | Blue  | D80N/F87S/M212P/R256G             |
| C9  | Blue  | A180E/R255D/Y256H                 |
| C11 | Blue  | L75F/R255D                        |
| C12 | Blue  | F87L/Y256K                        |
| D1  | Blue  | L181F                             |
| D2  | Blue  | F81R/F87L/M177L                   |
| D3  | Blue  | F87L/A180E/A184F/Y256K/I259K      |
| D4  | Blue  | F173P/R255D                       |
| D5  | Blue  | D80C/F81Y/F173H/M177H/L181P/I259G |
| D6  | Blue  | F87L/M177L/L181I                  |
| D7  | Blue  | F87S/I259P                        |
| D9  | Blue  | R255G/I259G                       |
| D10 | Blue  | D80N/M212P                        |
| D11 | Blue  | A180F/L181F                       |
| D12 | Blue  | A82E/L181I/R255I                  |
| E1  | Beige | L71H                              |
| E2  | Beige | L71N                              |
| E3  | Beige | L71Q                              |
| E4  | Beige | L75P                              |
| E5  | Beige | D80L                              |
| E6  | Blue  | D80C                              |
| E7  | Beige | G83F                              |
| E8  | Beige | G83K                              |
| E9  | Beige | F173C                             |
| E10 | Beige | A180D                             |
| E11 | Beige | A180N                             |
| E12 | Beige | L181N                             |
| F1  | Beige | Y256M                             |
| F2  | Beige | I258F                             |
| F3  | Beige | L262P                             |
| F4  | Beige | H266K                             |
| F5  | Beige | F87P/F173H/I263Q                  |
| F6  | Blue  | F81Y/F173H/A180P                  |
| F7  | Beige | F81R/F87G/L181I/I259P             |

|     |       |                                         |
|-----|-------|-----------------------------------------|
| F8  | Blue  | A82P/F173H/L181I/R255I/T256K/I263Q      |
| F9  | Beige | F81R/T88P/F173H/A180W/M212W/I259K/I263H |
| F10 | Beige | L75R/M177P/A180E/A184K/Y256K/I263H      |
| F11 | Beige | D80P/F87L/F173E/A184E/I259G/I263H       |
| F12 | Beige | F173E/M177L/L181I/M212R/Y256V/I263S     |
| G1  | Blue  | D80P/A82F/F87P/L181F                    |
| G2  | Beige | F81R/F173P/M177H/A180F/I259P            |
| G3  | Beige | L75R/I259G                              |
| G4  | Beige | D80C/F173P/A180F/M212K/R255P            |
| G5  | Blue  | F81Y/A82S/M212R/I263G                   |
| G6  | Beige | D80P/F81L/I263N                         |
| G7  | Blue  | F87L/M177L/R255G/I263N                  |
| G8  | Blue  | P172H/Y256K/I263G                       |
| G9  | Blue  | M177H/I263S                             |
| G10 | Blue  | R255M/Y256H                             |
| G11 | Blue  | A82F                                    |
| G12 | Blue  | A82F/L181F                              |
| H1  | Beige | D80N/F81Y/F173P/R255G/Y256H             |
| H2  | Beige | F173E/M177H/M212R/I263S                 |
| H3  | Beige | L75H/F81Y/F87P/L181P/M212R/R255D/Y256V  |
| H4  | Beige | F87P/S164-STOP/R255P/I263G              |
| H5  | Beige | F81R/A82L/F173H/R255P                   |
| H6  | Beige | M177L/A184F/M212P/Y256V/I259G           |
| H7  | Beige | F173P/I259G                             |
| H8  | Blue  | I259G                                   |
| H9  | Beige | A180M/I259G                             |
| H10 | Blue  | M212K/I259G                             |
| H12 | Blue  | D80C/M177H/A180F/R255M                  |

**Supplementary Table 3. Indigo (+) variants reported in the literature.**

|                                 |                                 |                                     |                                       |
|---------------------------------|---------------------------------|-------------------------------------|---------------------------------------|
| V78A <sup>15</sup>              | V78G <sup>15</sup>              | V78S <sup>15</sup>                  | A82E <sup>15</sup>                    |
| A82F <sup>15-19</sup>           | A82G <sup>15</sup>              | A82I <sup>17</sup>                  | A82K <sup>15</sup>                    |
| A82L <sup>15</sup>              | A82Q <sup>15</sup>              | A82W <sup>15, 17, 18</sup>          | F87A <sup>20, 21</sup>                |
| F87G <sup>21, 22</sup>          | F87L <sup>15</sup>              | F87N <sup>15</sup>                  | F87P <sup>15</sup>                    |
| F87V <sup>15, 23, 24</sup>      | F162I <sup>25</sup>             | L188Q <sup>24</sup>                 | A264G <sup>15</sup>                   |
| A264V <sup>15</sup>             | V78A/F87A <sup>21</sup>         | V78A/F87G <sup>21</sup>             | F87A/T268A <sup>21</sup>              |
| F87A/T268I <sup>21</sup>        | F87A/T268V <sup>21</sup>        | F87G/T268A <sup>21</sup>            | F87G/T268I <sup>21</sup>              |
| F87G/T268V <sup>21</sup>        | F87G/T268V <sup>21</sup>        | F87V/L188Q <sup>24</sup>            | L148I/F162I <sup>25</sup>             |
| F162I/E228K <sup>25</sup>       | F162I/H236R <sup>25</sup>       | F162I/K187E <sup>25</sup>           | F162I/M237I <sup>25</sup>             |
| A180F/L181V <sup>16, 19</sup>   | A180I/L181F <sup>16, 19</sup>   | A180I/L181Y <sup>16</sup>           | A180R/L181H <sup>16, 19</sup>         |
| A180Y/L181F <sup>19</sup>       | A184I/L188Y <sup>19</sup>       | A184N/L188F <sup>16, 19</sup>       | A184N/L188H <sup>16, 19</sup>         |
| A184N/L188N <sup>16, 19</sup>   | A184N/L188S <sup>16, 19</sup>   | A184N/L188Y <sup>16, 19</sup>       | A328C/A330V <sup>19</sup>             |
| A328F/A330F <sup>19</sup>       | A328L/A330I <sup>19</sup>       | A399F/Q403F <sup>26</sup>           | A74G/F87V/L188Q <sup>24, 27, 28</sup> |
| F162I/K187E/M237I <sup>25</sup> | F162I/M185V/M237I <sup>25</sup> | A74G/F87V/D168H/L188Q <sup>28</sup> | A74G/F87V/L188Q/A225F <sup>28</sup>   |

|                                                     |                                         |                                         |                                           |
|-----------------------------------------------------|-----------------------------------------|-----------------------------------------|-------------------------------------------|
| A74G/F87V/L188Q/A2<br>25G <sup>28</sup>             | A74G/F87V/L188Q/A2<br>25P <sup>28</sup> | A74G/F87V/L188Q/A2<br>25Q <sup>28</sup> | A74G/F87V/L188Q/E43<br>5D <sup>28</sup>   |
| A74G/F87V/L188Q/E43<br>5T <sup>28</sup>             | A74G/F87V/L188Q/K4<br>34R <sup>28</sup> | A74G/F87V/L188Q/V4<br>45A <sup>27</sup> | A74G/F87V/L188Q/V4<br>45G <sup>27</sup>   |
| A74G/F87V/L188Q/V4<br>45M <sup>27</sup>             | A74G/F87V/L188Q/V4<br>45S <sup>27</sup> | A74G/F87V/L188Q/V4<br>45T <sup>27</sup> | F162I/M185T/L188P/<br>M237I <sup>25</sup> |
| A74G/F87V/D168N/L1<br>88Q/A225V/K440N <sup>28</sup> |                                         |                                         |                                           |



**Supplementary Table 4.** Raw 4-AAP and NADPH rate assays data.

| Variant  | Phenotype | Enzyme concentration ( $\mu\text{M}$ ) | N | Substrate | 4-AAP Abs (a.u) | NADPH rate ( $\mu\text{M}/\text{min}$ ) |
|----------|-----------|----------------------------------------|---|-----------|-----------------|-----------------------------------------|
| WT       | Beige     | 0.79                                   | 6 | 1         | 0.00            | 0.024                                   |
| WT       | Beige     | 0.79                                   | 6 | 2         | 0.00            | 0.019                                   |
| WT       | Beige     | 0.79                                   | 6 | 3         | 0.00            | 0.031                                   |
| WT       | Beige     | 0.79                                   | 6 | 4         | 0.00            | 0.047                                   |
| WT       | Beige     | 0.79                                   | 6 | 5         | 0.00            | 0.029                                   |
| WT       | Beige     | 0.79                                   | 6 | 6         | 0.00            | 0.071                                   |
| WT       | Beige     | 0.79                                   | 6 | 7         | 0.05            | 0.086                                   |
| WT       | Beige     | 0.79                                   | 6 | 8         | 0.00            | 0.081                                   |
| WT       | Beige     | 0.79                                   | 6 | 9         | 0.00            | 0.035                                   |
| WT       | Beige     | 0.79                                   | 6 | 10        | 0.00            | 0.060                                   |
| WT       | Beige     | 0.79                                   | 6 | 11        | 0.00            | 0.073                                   |
| WT       | Beige     | 0.79                                   | 6 | 12        | 0.41            | 0.043                                   |
| His-A82Q | Blue      | 0.94                                   | 2 | 1         | 0.13            | 0.021                                   |
| His-A82Q | Blue      | 0.94                                   | 2 | 2         | 0.01            | 0.026                                   |
| His-A82Q | Blue      | 0.94                                   | 2 | 3         | 0.04            | 0.021                                   |
| His-A82Q | Blue      | 0.94                                   | 2 | 4         | 0.05            | 0.008                                   |
| His-A82Q | Blue      | 0.94                                   | 2 | 5         | 0.04            | 0.029                                   |
| His-A82Q | Blue      | 0.94                                   | 2 | 6         | 0.02            | 0.030                                   |
| His-A82Q | Blue      | 0.94                                   | 2 | 7         | 0.20            | 0.036                                   |
| His-A82Q | Blue      | 0.94                                   | 2 | 8         | 0.04            | 0.039                                   |
| His-A82Q | Blue      | 0.94                                   | 2 | 9         | 0.11            | 0.028                                   |
| His-A82Q | Blue      | 0.94                                   | 2 | 10        | 0.09            | 0.052                                   |
| His-A82Q | Blue      | 0.94                                   | 2 | 11        | 0.17            | 0.017                                   |
| His-A82Q | Blue      | 0.94                                   | 2 | 12        | 0.17            | 0.032                                   |
| A1       | Blue      | 4.43                                   | 2 | 1         | 0.30            | 0.013                                   |
| A1       | Blue      | 4.43                                   | 2 | 2         | 0.36            | 0.024                                   |
| A1       | Blue      | 4.43                                   | 2 | 3         | 0.13            | 0.059                                   |
| A1       | Blue      | 4.43                                   | 2 | 4         | 0.28            | 0.068                                   |
| A1       | Blue      | 4.43                                   | 2 | 5         | 0.15            | 0.016                                   |
| A1       | Blue      | 4.43                                   | 2 | 6         | 0.27            | 0.047                                   |
| A1       | Blue      | 4.43                                   | 2 | 7         | 0.04            | 0.039                                   |
| A1       | Blue      | 4.43                                   | 2 | 8         | 0.06            | 0.078                                   |
| A1       | Blue      | 4.43                                   | 2 | 9         | 0.03            | 0.028                                   |
| A1       | Blue      | 4.43                                   | 2 | 10        | 0.10            | 0.034                                   |
| A1       | Blue      | 4.43                                   | 2 | 11        | 0.68            | 0.062                                   |
| A1       | Blue      | 4.43                                   | 2 | 12        | 0.06            | 0.044                                   |
| A2       | Blue      | 4.48                                   | 2 | 1         | 0.07            | 0.012                                   |
| A2       | Blue      | 4.48                                   | 2 | 2         | 0.08            | 0.018                                   |
| A2       | Blue      | 4.48                                   | 2 | 3         | 0.13            | 0.024                                   |
| A2       | Blue      | 4.48                                   | 2 | 4         | 0.04            | 0.021                                   |
| A2       | Blue      | 4.48                                   | 2 | 5         | 0.22            | 0.023                                   |
| A2       | Blue      | 4.48                                   | 2 | 6         | 0.07            | 0.046                                   |
| A2       | Blue      | 4.48                                   | 2 | 7         | 0.25            | 0.023                                   |
| A2       | Blue      | 4.48                                   | 2 | 8         | 0.13            | 0.065                                   |
| A2       | Blue      | 4.48                                   | 2 | 9         | 0.04            | 0.041                                   |
| A2       | Blue      | 4.48                                   | 2 | 10        | 0.01            | 0.064                                   |
| A2       | Blue      | 4.48                                   | 2 | 11        | 0.06            | 0.066                                   |
| A2       | Blue      | 4.48                                   | 2 | 12        | 0.13            | 0.042                                   |
| A3       | Blue      | 4.55                                   | 2 | 1         | 0.14            | 0.040                                   |
| A3       | Blue      | 4.55                                   | 2 | 2         | 0.23            | 0.032                                   |
| A3       | Blue      | 4.55                                   | 2 | 3         | 0.12            | 0.052                                   |

|    |      |       |   |    |      |       |
|----|------|-------|---|----|------|-------|
| A3 | Blue | 4.55  | 2 | 4  | 0.15 | 0.064 |
| A3 | Blue | 4.55  | 2 | 5  | 0.23 | 0.044 |
| A3 | Blue | 4.55  | 2 | 6  | 0.14 | 0.064 |
| A3 | Blue | 4.55  | 2 | 7  | 0.28 | 0.057 |
| A3 | Blue | 4.55  | 2 | 8  | 0.09 | 0.063 |
| A3 | Blue | 4.55  | 2 | 9  | 0.07 | 0.051 |
| A3 | Blue | 4.55  | 2 | 10 | 0.03 | 0.061 |
| A3 | Blue | 4.55  | 2 | 11 | 0.09 | 0.081 |
| A3 | Blue | 4.55  | 2 | 12 | 0.48 | 0.040 |
| A4 | Blue | 4.99  | 2 | 1  | 0.23 | 0.045 |
| A4 | Blue | 4.99  | 2 | 2  | 0.27 | 0.021 |
| A4 | Blue | 4.99  | 2 | 3  | 0.17 | 0.047 |
| A4 | Blue | 4.99  | 2 | 4  | 0.06 | 0.056 |
| A4 | Blue | 4.99  | 2 | 5  | 0.16 | 0.016 |
| A4 | Blue | 4.99  | 2 | 6  | 0.07 | 0.062 |
| A4 | Blue | 4.99  | 2 | 7  | 0.28 | 0.034 |
| A4 | Blue | 4.99  | 2 | 8  | 0.10 | 0.036 |
| A4 | Blue | 4.99  | 2 | 9  | 0.08 | 0.025 |
| A4 | Blue | 4.99  | 2 | 10 | 0.07 | 0.053 |
| A4 | Blue | 4.99  | 2 | 11 | 0.18 | 0.065 |
| A4 | Blue | 4.99  | 2 | 12 | 0.61 | 0.044 |
| A5 | Blue | 1.11  | 2 | 1  | 0.31 | 0.006 |
| A5 | Blue | 1.11  | 2 | 2  | 0.81 | 0.058 |
| A5 | Blue | 1.11  | 2 | 3  | 0.46 | 0.093 |
| A5 | Blue | 1.11  | 2 | 4  | 0.41 | 0.077 |
| A5 | Blue | 1.11  | 2 | 5  | 0.50 | 0.063 |
| A5 | Blue | 1.11  | 2 | 6  | 0.37 | 0.094 |
| A5 | Blue | 1.11  | 2 | 7  | 0.51 | 0.097 |
| A5 | Blue | 1.11  | 2 | 8  | 0.31 | 0.093 |
| A5 | Blue | 1.11  | 2 | 9  | 0.37 | 0.060 |
| A5 | Blue | 1.11  | 2 | 10 | 0.40 | 0.059 |
| A5 | Blue | 1.11  | 2 | 11 | 0.38 | 0.075 |
| A5 | Blue | 1.11  | 2 | 12 | 0.90 | 0.059 |
| A6 | Blue | -0.47 | 2 | 1  | 0.00 | 0.059 |
| A6 | Blue | -0.47 | 2 | 2  | 0.00 | 0.064 |
| A6 | Blue | -0.47 | 2 | 3  | 0.00 | 0.071 |
| A6 | Blue | -0.47 | 2 | 4  | 0.00 | 0.054 |
| A6 | Blue | -0.47 | 2 | 5  | 0.00 | 0.067 |
| A6 | Blue | -0.47 | 2 | 6  | 0.00 | 0.069 |
| A6 | Blue | -0.47 | 2 | 7  | 0.00 | 0.076 |
| A6 | Blue | -0.47 | 2 | 8  | 0.00 | 0.071 |
| A6 | Blue | -0.47 | 2 | 9  | 0.00 | 0.058 |
| A6 | Blue | -0.47 | 2 | 10 | 0.00 | 0.103 |
| A6 | Blue | -0.47 | 2 | 11 | 0.00 | 0.076 |
| A6 | Blue | -0.47 | 2 | 12 | 0.00 | 0.082 |
| A7 | Blue | 0.78  | 2 | 1  | 0.00 | 0.032 |
| A7 | Blue | 0.78  | 2 | 2  | 0.06 | 0.032 |
| A7 | Blue | 0.78  | 2 | 3  | 0.06 | 0.040 |
| A7 | Blue | 0.78  | 2 | 4  | 0.00 | 0.045 |
| A7 | Blue | 0.78  | 2 | 5  | 0.05 | 0.044 |
| A7 | Blue | 0.78  | 2 | 6  | 0.00 | 0.037 |
| A7 | Blue | 0.78  | 2 | 7  | 0.07 | 0.029 |
| A7 | Blue | 0.78  | 2 | 8  | 0.03 | 0.038 |

|     |      |       |   |    |      |        |
|-----|------|-------|---|----|------|--------|
| A7  | Blue | 0.78  | 2 | 9  | 0.00 | 0.051  |
| A7  | Blue | 0.78  | 2 | 10 | 0.00 | 0.031  |
| A7  | Blue | 0.78  | 2 | 11 | 0.00 | 0.056  |
| A7  | Blue | 0.78  | 2 | 12 | 0.22 | 0.044  |
| A9  | Blue | 2.92  | 2 | 1  | 0.09 | 0.083  |
| A9  | Blue | 2.92  | 2 | 2  | 0.54 | 0.044  |
| A9  | Blue | 2.92  | 2 | 3  | 0.25 | 0.092  |
| A9  | Blue | 2.92  | 2 | 4  | 0.24 | 0.088  |
| A9  | Blue | 2.92  | 2 | 5  | 0.40 | 0.075  |
| A9  | Blue | 2.92  | 2 | 6  | 0.21 | 0.156  |
| A9  | Blue | 2.92  | 2 | 7  | 0.29 | 0.098  |
| A9  | Blue | 2.92  | 2 | 8  | 0.13 | 0.118  |
| A9  | Blue | 2.92  | 2 | 9  | 0.14 | 0.071  |
| A9  | Blue | 2.92  | 2 | 10 | 0.15 | 0.101  |
| A9  | Blue | 2.92  | 2 | 11 | 0.09 | 0.107  |
| A9  | Blue | 2.92  | 2 | 12 | 0.82 | 0.129  |
| A10 | Blue | -0.20 | 2 | 1  | 0.06 | 0.021  |
| A10 | Blue | -0.20 | 2 | 2  | 0.05 | 0.029  |
| A10 | Blue | -0.20 | 2 | 3  | 0.15 | 0.044  |
| A10 | Blue | -0.20 | 2 | 4  | 0.08 | 0.021  |
| A10 | Blue | -0.20 | 2 | 5  | 0.04 | 0.034  |
| A10 | Blue | -0.20 | 2 | 6  | 0.03 | 0.045  |
| A10 | Blue | -0.20 | 2 | 7  | 0.13 | 0.066  |
| A10 | Blue | -0.20 | 2 | 8  | 0.07 | 0.037  |
| A10 | Blue | -0.20 | 2 | 9  | 0.05 | 0.022  |
| A10 | Blue | -0.20 | 2 | 10 | 0.09 | 0.053  |
| A10 | Blue | -0.20 | 2 | 11 | 0.17 | 0.040  |
| A10 | Blue | -0.20 | 2 | 12 | 0.28 | 0.037  |
| A11 | Blue | 0.49  | 2 | 1  | 0.15 | 0.010  |
| A11 | Blue | 0.49  | 2 | 2  | 0.23 | 0.015  |
| A11 | Blue | 0.49  | 2 | 3  | 0.21 | 0.027  |
| A11 | Blue | 0.49  | 2 | 4  | 0.20 | 0.016  |
| A11 | Blue | 0.49  | 2 | 5  | 0.25 | 0.015  |
| A11 | Blue | 0.49  | 2 | 6  | 0.22 | 0.031  |
| A11 | Blue | 0.49  | 2 | 7  | 0.34 | 0.044  |
| A11 | Blue | 0.49  | 2 | 8  | 0.18 | 0.022  |
| A11 | Blue | 0.49  | 2 | 9  | 0.14 | 0.006  |
| A11 | Blue | 0.49  | 2 | 10 | 0.16 | 0.042  |
| A11 | Blue | 0.49  | 2 | 11 | 0.14 | 0.022  |
| A11 | Blue | 0.49  | 2 | 12 | 0.42 | 0.028  |
| A12 | Blue | 0.43  | 2 | 1  | 0.00 | 0.054  |
| A12 | Blue | 0.43  | 2 | 2  | 0.50 | 0.063  |
| A12 | Blue | 0.43  | 2 | 3  | 0.07 | 0.049  |
| A12 | Blue | 0.43  | 2 | 4  | 0.00 | 0.053  |
| A12 | Blue | 0.43  | 2 | 5  | 0.11 | 0.117  |
| A12 | Blue | 0.43  | 2 | 6  | 0.00 | 0.048  |
| A12 | Blue | 0.43  | 2 | 7  | 0.00 | 0.054  |
| A12 | Blue | 0.43  | 2 | 8  | 0.00 | 0.047  |
| A12 | Blue | 0.43  | 2 | 9  | 0.00 | 0.053  |
| A12 | Blue | 0.43  | 2 | 10 | 0.00 | -0.006 |
| A12 | Blue | 0.43  | 2 | 11 | 0.02 | 0.068  |
| A12 | Blue | 0.43  | 2 | 12 | 0.51 | 0.082  |
| B1  | Blue | 1.32  | 2 | 1  | 0.17 | -0.003 |

|    |      |       |   |    |      |       |
|----|------|-------|---|----|------|-------|
| B1 | Blue | 1.32  | 2 | 2  | 0.01 | 0.018 |
| B1 | Blue | 1.32  | 2 | 3  | 0.00 | 0.039 |
| B1 | Blue | 1.32  | 2 | 4  | 0.12 | 0.028 |
| B1 | Blue | 1.32  | 2 | 5  | 0.00 | 0.026 |
| B1 | Blue | 1.32  | 2 | 6  | 0.17 | 0.062 |
| B1 | Blue | 1.32  | 2 | 7  | 0.04 | 0.053 |
| B1 | Blue | 1.32  | 2 | 8  | 0.03 | 0.051 |
| B1 | Blue | 1.32  | 2 | 9  | 0.05 | 0.020 |
| B1 | Blue | 1.32  | 2 | 10 | 0.08 | 0.060 |
| B1 | Blue | 1.32  | 2 | 11 | 0.95 | 0.049 |
| B1 | Blue | 1.32  | 2 | 12 | 0.08 | 0.078 |
| B2 | Blue | 1.01  | 2 | 1  | 0.02 | 0.068 |
| B2 | Blue | 1.01  | 2 | 2  | 0.48 | 0.096 |
| B2 | Blue | 1.01  | 2 | 3  | 0.13 | 0.091 |
| B2 | Blue | 1.01  | 2 | 4  | 0.12 | 0.085 |
| B2 | Blue | 1.01  | 2 | 5  | 0.22 | 0.096 |
| B2 | Blue | 1.01  | 2 | 6  | 0.09 | 0.089 |
| B2 | Blue | 1.01  | 2 | 7  | 0.22 | 0.110 |
| B2 | Blue | 1.01  | 2 | 8  | 0.07 | 0.110 |
| B2 | Blue | 1.01  | 2 | 9  | 0.03 | 0.106 |
| B2 | Blue | 1.01  | 2 | 10 | 0.01 | 0.110 |
| B2 | Blue | 1.01  | 2 | 11 | 0.00 | 0.111 |
| B2 | Blue | 1.01  | 2 | 12 | 0.36 | 0.097 |
| B3 | Blue | 7.01  | 2 | 1  | 0.03 | 0.067 |
| B3 | Blue | 7.01  | 2 | 2  | 0.24 | 0.048 |
| B3 | Blue | 7.01  | 2 | 3  | 0.02 | 0.038 |
| B3 | Blue | 7.01  | 2 | 4  | 0.00 | 0.030 |
| B3 | Blue | 7.01  | 2 | 5  | 0.05 | 0.033 |
| B3 | Blue | 7.01  | 2 | 6  | 0.00 | 0.031 |
| B3 | Blue | 7.01  | 2 | 7  | 0.19 | 0.042 |
| B3 | Blue | 7.01  | 2 | 8  | 0.03 | 0.033 |
| B3 | Blue | 7.01  | 2 | 9  | 0.02 | 0.050 |
| B3 | Blue | 7.01  | 2 | 10 | 0.04 | 0.054 |
| B3 | Blue | 7.01  | 2 | 11 | 0.06 | 0.060 |
| B3 | Blue | 7.01  | 2 | 12 | 0.39 | 0.047 |
| B4 | Blue | 3.52  | 2 | 1  | 0.00 | 0.016 |
| B4 | Blue | 3.52  | 2 | 2  | 0.00 | 0.017 |
| B4 | Blue | 3.52  | 2 | 3  | 0.00 | 0.038 |
| B4 | Blue | 3.52  | 2 | 4  | 0.00 | 0.030 |
| B4 | Blue | 3.52  | 2 | 5  | 0.00 | 0.031 |
| B4 | Blue | 3.52  | 2 | 6  | 0.00 | 0.048 |
| B4 | Blue | 3.52  | 2 | 7  | 0.15 | 0.042 |
| B4 | Blue | 3.52  | 2 | 8  | 0.00 | 0.054 |
| B4 | Blue | 3.52  | 2 | 9  | 0.00 | 0.043 |
| B4 | Blue | 3.52  | 2 | 10 | 0.00 | 0.085 |
| B4 | Blue | 3.52  | 2 | 11 | 0.00 | 0.047 |
| B4 | Blue | 3.52  | 2 | 12 | 0.00 | 0.035 |
| B5 | Blue | -0.66 | 2 | 1  | 0.18 | 0.013 |
| B5 | Blue | -0.66 | 2 | 2  | 0.13 | 0.007 |
| B5 | Blue | -0.66 | 2 | 3  | 0.15 | 0.033 |
| B5 | Blue | -0.66 | 2 | 4  | 0.13 | 0.027 |
| B5 | Blue | -0.66 | 2 | 5  | 0.18 | 0.037 |
| B5 | Blue | -0.66 | 2 | 6  | 0.21 | 0.038 |

|    |      |       |   |    |      |        |
|----|------|-------|---|----|------|--------|
| B5 | Blue | -0.66 | 2 | 7  | 0.34 | 0.090  |
| B5 | Blue | -0.66 | 2 | 8  | 0.25 | 0.032  |
| B5 | Blue | -0.66 | 2 | 9  | 0.23 | 0.017  |
| B5 | Blue | -0.66 | 2 | 10 | 0.27 | 0.046  |
| B5 | Blue | -0.66 | 2 | 11 | 0.27 | 0.026  |
| B5 | Blue | -0.66 | 2 | 12 | 0.24 | 0.010  |
| B6 | Blue | 1.59  | 4 | 1  | 0.11 | 0.071  |
| B6 | Blue | 1.59  | 4 | 2  | 0.26 | 0.054  |
| B6 | Blue | 1.59  | 4 | 3  | 0.10 | 0.043  |
| B6 | Blue | 1.59  | 4 | 4  | 0.01 | 0.040  |
| B6 | Blue | 1.59  | 4 | 5  | 0.06 | 0.073  |
| B6 | Blue | 1.59  | 4 | 6  | 0.18 | 0.042  |
| B6 | Blue | 1.59  | 4 | 7  | 0.20 | 0.065  |
| B6 | Blue | 1.59  | 4 | 8  | 0.07 | 0.055  |
| B6 | Blue | 1.59  | 4 | 9  | 0.06 | 0.072  |
| B6 | Blue | 1.59  | 4 | 10 | 0.06 | 0.067  |
| B6 | Blue | 1.59  | 4 | 11 | 0.12 | 0.035  |
| B6 | Blue | 1.59  | 4 | 12 | 0.35 | 0.041  |
| B7 | Blue | 0.47  | 2 | 1  | 0.00 | 0.001  |
| B7 | Blue | 0.47  | 2 | 2  | 0.00 | 0.003  |
| B7 | Blue | 0.47  | 2 | 3  | 0.00 | 0.002  |
| B7 | Blue | 0.47  | 2 | 4  | 0.00 | -0.001 |
| B7 | Blue | 0.47  | 2 | 5  | 0.00 | 0.002  |
| B7 | Blue | 0.47  | 2 | 6  | 0.00 | 0.003  |
| B7 | Blue | 0.47  | 2 | 7  | 0.03 | 0.002  |
| B7 | Blue | 0.47  | 2 | 8  | 0.00 | 0.001  |
| B7 | Blue | 0.47  | 2 | 9  | 0.00 | 0.002  |
| B7 | Blue | 0.47  | 2 | 10 | 0.00 | 0.008  |
| B7 | Blue | 0.47  | 2 | 11 | 0.00 | 0.002  |
| B7 | Blue | 0.47  | 2 | 12 | 0.00 | 0.005  |
| B8 | Blue | 0.95  | 2 | 1  | 0.27 | 0.078  |
| B8 | Blue | 0.95  | 2 | 2  | 0.70 | 0.048  |
| B8 | Blue | 0.95  | 2 | 3  | 0.41 | 0.042  |
| B8 | Blue | 0.95  | 2 | 4  | 0.27 | 0.023  |
| B8 | Blue | 0.95  | 2 | 5  | 0.44 | 0.048  |
| B8 | Blue | 0.95  | 2 | 6  | 0.26 | 0.033  |
| B8 | Blue | 0.95  | 2 | 7  | 0.38 | 0.054  |
| B8 | Blue | 0.95  | 2 | 8  | 0.22 | 0.030  |
| B8 | Blue | 0.95  | 2 | 9  | 0.20 | 0.068  |
| B8 | Blue | 0.95  | 2 | 10 | 0.24 | 0.064  |
| B8 | Blue | 0.95  | 2 | 11 | 0.20 | 0.057  |
| B8 | Blue | 0.95  | 2 | 12 | 0.62 | 0.047  |
| B9 | Blue | 0.33  | 2 | 1  | 0.00 | 0.042  |
| B9 | Blue | 0.33  | 2 | 2  | 0.00 | 0.044  |
| B9 | Blue | 0.33  | 2 | 3  | 0.00 | 0.047  |
| B9 | Blue | 0.33  | 2 | 4  | 0.00 | 0.043  |
| B9 | Blue | 0.33  | 2 | 5  | 0.00 | 0.051  |
| B9 | Blue | 0.33  | 2 | 6  | 0.00 | 0.044  |
| B9 | Blue | 0.33  | 2 | 7  | 0.00 | 0.034  |
| B9 | Blue | 0.33  | 2 | 8  | 0.00 | 0.058  |
| B9 | Blue | 0.33  | 2 | 9  | 0.00 | 0.052  |
| B9 | Blue | 0.33  | 2 | 10 | 0.00 | 0.024  |
| B9 | Blue | 0.33  | 2 | 11 | 0.03 | 0.036  |

|     |      |      |   |    |      |       |
|-----|------|------|---|----|------|-------|
| B9  | Blue | 0.33 | 2 | 12 | 0.02 | 0.055 |
| B10 | Blue | 0.92 | 2 | 1  | 0.22 | 0.033 |
| B10 | Blue | 0.92 | 2 | 2  | 0.30 | 0.033 |
| B10 | Blue | 0.92 | 2 | 3  | 0.31 | 0.039 |
| B10 | Blue | 0.92 | 2 | 4  | 0.65 | 0.035 |
| B10 | Blue | 0.92 | 2 | 5  | 0.26 | 0.027 |
| B10 | Blue | 0.92 | 2 | 6  | 0.21 | 0.028 |
| B10 | Blue | 0.92 | 2 | 7  | 0.36 | 0.040 |
| B10 | Blue | 0.92 | 2 | 8  | 0.19 | 0.031 |
| B10 | Blue | 0.92 | 2 | 9  | 0.21 | 0.031 |
| B10 | Blue | 0.92 | 2 | 10 | 0.20 | 0.018 |
| B10 | Blue | 0.92 | 2 | 11 | 0.18 | 0.035 |
| B10 | Blue | 0.92 | 2 | 12 | 0.22 | 0.024 |
| B11 | Blue | 2.92 | 2 | 1  | 0.23 | 0.012 |
| B11 | Blue | 2.92 | 2 | 2  | 0.24 | 0.018 |
| B11 | Blue | 2.92 | 2 | 3  | 0.21 | 0.006 |
| B11 | Blue | 2.92 | 2 | 4  | 0.18 | 0.004 |
| B11 | Blue | 2.92 | 2 | 5  | 0.25 | 0.026 |
| B11 | Blue | 2.92 | 2 | 6  | 0.12 | 0.023 |
| B11 | Blue | 2.92 | 2 | 7  | 0.31 | 0.022 |
| B11 | Blue | 2.92 | 2 | 8  | 0.16 | 0.049 |
| B11 | Blue | 2.92 | 2 | 9  | 0.18 | 0.008 |
| B11 | Blue | 2.92 | 2 | 10 | 0.19 | 0.051 |
| B11 | Blue | 2.92 | 2 | 11 | 0.29 | 0.058 |
| B11 | Blue | 2.92 | 2 | 12 | 0.78 | 0.020 |
| B12 | Blue | 0.41 | 4 | 1  | 0.04 | 0.045 |
| B12 | Blue | 0.41 | 4 | 2  | 0.19 | 0.047 |
| B12 | Blue | 0.41 | 4 | 3  | 0.13 | 0.057 |
| B12 | Blue | 0.41 | 4 | 4  | 0.10 | 0.052 |
| B12 | Blue | 0.41 | 4 | 5  | 0.33 | 0.052 |
| B12 | Blue | 0.41 | 4 | 6  | 0.14 | 0.060 |
| B12 | Blue | 0.41 | 4 | 7  | 0.18 | 0.042 |
| B12 | Blue | 0.41 | 4 | 8  | 0.13 | 0.049 |
| B12 | Blue | 0.41 | 4 | 9  | 0.14 | 0.044 |
| B12 | Blue | 0.41 | 4 | 10 | 0.15 | 0.034 |
| B12 | Blue | 0.41 | 4 | 11 | 0.18 | 0.041 |
| B12 | Blue | 0.41 | 4 | 12 | 0.22 | 0.040 |
| C1  | Blue | 1.34 | 2 | 1  | 0.00 | 0.050 |
| C1  | Blue | 1.34 | 2 | 2  | 0.84 | 0.070 |
| C1  | Blue | 1.34 | 2 | 3  | 0.38 | 0.104 |
| C1  | Blue | 1.34 | 2 | 4  | 0.28 | 0.075 |
| C1  | Blue | 1.34 | 2 | 5  | 0.61 | 0.086 |
| C1  | Blue | 1.34 | 2 | 6  | 0.24 | 0.083 |
| C1  | Blue | 1.34 | 2 | 7  | 0.34 | 0.050 |
| C1  | Blue | 1.34 | 2 | 8  | 0.19 | 0.100 |
| C1  | Blue | 1.34 | 2 | 9  | 0.25 | 0.038 |
| C1  | Blue | 1.34 | 2 | 10 | 0.15 | 0.118 |
| C1  | Blue | 1.34 | 2 | 11 | 0.20 | 0.072 |
| C1  | Blue | 1.34 | 2 | 12 | 0.93 | 0.109 |
| C2  | Blue | 2.81 | 2 | 1  | 0.09 | 0.042 |
| C2  | Blue | 2.81 | 2 | 2  | 0.14 | 0.049 |
| C2  | Blue | 2.81 | 2 | 3  | 0.27 | 0.067 |
| C2  | Blue | 2.81 | 2 | 4  | 0.10 | 0.050 |

|    |      |      |   |    |      |       |
|----|------|------|---|----|------|-------|
| C2 | Blue | 2.81 | 2 | 5  | 0.11 | 0.070 |
| C2 | Blue | 2.81 | 2 | 6  | 0.10 | 0.128 |
| C2 | Blue | 2.81 | 2 | 7  | 0.33 | 0.070 |
| C2 | Blue | 2.81 | 2 | 8  | 0.19 | 0.089 |
| C2 | Blue | 2.81 | 2 | 9  | 0.14 | 0.074 |
| C2 | Blue | 2.81 | 2 | 10 | 0.13 | 0.062 |
| C2 | Blue | 2.81 | 2 | 11 | 0.12 | 0.091 |
| C2 | Blue | 2.81 | 2 | 12 | 0.14 | 0.074 |
| C3 | Blue | 0.11 | 2 | 1  | 0.21 | 0.010 |
| C3 | Blue | 0.11 | 2 | 2  | 0.26 | 0.018 |
| C3 | Blue | 0.11 | 2 | 3  | 0.24 | 0.030 |
| C3 | Blue | 0.11 | 2 | 4  | 0.20 | 0.023 |
| C3 | Blue | 0.11 | 2 | 5  | 0.14 | 0.030 |
| C3 | Blue | 0.11 | 2 | 6  | 0.14 | 0.007 |
| C3 | Blue | 0.11 | 2 | 7  | 0.24 | 0.016 |
| C3 | Blue | 0.11 | 2 | 8  | 0.14 | 0.026 |
| C3 | Blue | 0.11 | 2 | 9  | 0.20 | 0.024 |
| C3 | Blue | 0.11 | 2 | 10 | 0.16 | 0.018 |
| C3 | Blue | 0.11 | 2 | 11 | 0.90 | 0.027 |
| C3 | Blue | 0.11 | 2 | 12 | 0.24 | 0.028 |
| C4 | Blue | 1.38 | 2 | 1  | 0.08 | 0.066 |
| C4 | Blue | 1.38 | 2 | 2  | 0.17 | 0.052 |
| C4 | Blue | 1.38 | 2 | 3  | 0.19 | 0.038 |
| C4 | Blue | 1.38 | 2 | 4  | 0.10 | 0.058 |
| C4 | Blue | 1.38 | 2 | 5  | 0.02 | 0.045 |
| C4 | Blue | 1.38 | 2 | 6  | 0.02 | 0.040 |
| C4 | Blue | 1.38 | 2 | 7  | 0.24 | 0.054 |
| C4 | Blue | 1.38 | 2 | 8  | 0.08 | 0.041 |
| C4 | Blue | 1.38 | 2 | 9  | 0.07 | 0.025 |
| C4 | Blue | 1.38 | 2 | 10 | 0.09 | 0.056 |
| C4 | Blue | 1.38 | 2 | 11 | 0.13 | 0.117 |
| C4 | Blue | 1.38 | 2 | 12 | 0.10 | 0.076 |
| C5 | Blue | 0.69 | 2 | 1  | 0.04 | 0.045 |
| C5 | Blue | 0.69 | 2 | 2  | 0.10 | 0.035 |
| C5 | Blue | 0.69 | 2 | 3  | 0.08 | 0.049 |
| C5 | Blue | 0.69 | 2 | 4  | 0.02 | 0.024 |
| C5 | Blue | 0.69 | 2 | 5  | 0.10 | 0.022 |
| C5 | Blue | 0.69 | 2 | 6  | 0.12 | 0.018 |
| C5 | Blue | 0.69 | 2 | 7  | 0.26 | 0.045 |
| C5 | Blue | 0.69 | 2 | 8  | 0.08 | 0.026 |
| C5 | Blue | 0.69 | 2 | 9  | 0.08 | 0.035 |
| C5 | Blue | 0.69 | 2 | 10 | 0.10 | 0.010 |
| C5 | Blue | 0.69 | 2 | 11 | 0.11 | 0.035 |
| C5 | Blue | 0.69 | 2 | 12 | 0.07 | 0.036 |
| C6 | Blue | 7.01 | 2 | 1  | 0.06 | 0.052 |
| C6 | Blue | 7.01 | 2 | 2  | 0.06 | 0.029 |
| C6 | Blue | 7.01 | 2 | 3  | 0.00 | 0.046 |
| C6 | Blue | 7.01 | 2 | 4  | 0.00 | 0.058 |
| C6 | Blue | 7.01 | 2 | 5  | 0.00 | 0.027 |
| C6 | Blue | 7.01 | 2 | 6  | 0.00 | 0.091 |
| C6 | Blue | 7.01 | 2 | 7  | 0.21 | 0.043 |
| C6 | Blue | 7.01 | 2 | 8  | 0.04 | 0.043 |
| C6 | Blue | 7.01 | 2 | 9  | 0.03 | 0.093 |

|     |      |       |   |    |      |       |
|-----|------|-------|---|----|------|-------|
| C6  | Blue | 7.01  | 2 | 10 | 0.04 | 0.058 |
| C6  | Blue | 7.01  | 2 | 11 | 0.05 | 0.070 |
| C6  | Blue | 7.01  | 2 | 12 | 0.09 | 0.073 |
| C7  | Blue | 0.30  | 2 | 1  | 0.14 | 0.021 |
| C7  | Blue | 0.30  | 2 | 2  | 0.14 | 0.043 |
| C7  | Blue | 0.30  | 2 | 3  | 0.06 | 0.027 |
| C7  | Blue | 0.30  | 2 | 4  | 0.03 | 0.038 |
| C7  | Blue | 0.30  | 2 | 5  | 0.03 | 0.030 |
| C7  | Blue | 0.30  | 2 | 6  | 0.02 | 0.031 |
| C7  | Blue | 0.30  | 2 | 7  | 0.15 | 0.017 |
| C7  | Blue | 0.30  | 2 | 8  | 0.12 | 0.028 |
| C7  | Blue | 0.30  | 2 | 9  | 0.09 | 0.017 |
| C7  | Blue | 0.30  | 2 | 10 | 0.14 | 0.026 |
| C7  | Blue | 0.30  | 2 | 11 | 0.15 | 0.015 |
| C7  | Blue | 0.30  | 2 | 12 | 0.24 | 0.038 |
| C9  | Blue | -0.01 | 2 | 1  | 0.10 | 0.047 |
| C9  | Blue | -0.01 | 2 | 2  | 0.27 | 0.052 |
| C9  | Blue | -0.01 | 2 | 3  | 0.15 | 0.056 |
| C9  | Blue | -0.01 | 2 | 4  | 0.02 | 0.063 |
| C9  | Blue | -0.01 | 2 | 5  | 0.03 | 0.050 |
| C9  | Blue | -0.01 | 2 | 6  | 0.00 | 0.053 |
| C9  | Blue | -0.01 | 2 | 7  | 0.14 | 0.046 |
| C9  | Blue | -0.01 | 2 | 8  | 0.07 | 0.048 |
| C9  | Blue | -0.01 | 2 | 9  | 0.01 | 0.041 |
| C9  | Blue | -0.01 | 2 | 10 | 0.17 | 0.048 |
| C9  | Blue | -0.01 | 2 | 11 | 0.02 | 0.056 |
| C9  | Blue | -0.01 | 2 | 12 | 0.14 | 0.047 |
| C11 | Blue | -0.16 | 2 | 1  | 0.04 | 0.036 |
| C11 | Blue | -0.16 | 2 | 2  | 0.05 | 0.042 |
| C11 | Blue | -0.16 | 2 | 3  | 0.05 | 0.041 |
| C11 | Blue | -0.16 | 2 | 4  | 0.04 | 0.036 |
| C11 | Blue | -0.16 | 2 | 5  | 0.04 | 0.036 |
| C11 | Blue | -0.16 | 2 | 6  | 0.00 | 0.026 |
| C11 | Blue | -0.16 | 2 | 7  | 0.10 | 0.030 |
| C11 | Blue | -0.16 | 2 | 8  | 0.00 | 0.030 |
| C11 | Blue | -0.16 | 2 | 9  | 0.00 | 0.034 |
| C11 | Blue | -0.16 | 2 | 10 | 0.00 | 0.028 |
| C11 | Blue | -0.16 | 2 | 11 | 0.00 | 0.054 |
| C11 | Blue | -0.16 | 2 | 12 | 0.01 | 0.048 |
| C12 | Blue | 0.48  | 4 | 1  | 0.08 | 0.013 |
| C12 | Blue | 0.48  | 4 | 2  | 0.02 | 0.014 |
| C12 | Blue | 0.48  | 4 | 3  | 0.11 | 0.021 |
| C12 | Blue | 0.48  | 4 | 4  | 0.10 | 0.024 |
| C12 | Blue | 0.48  | 4 | 5  | 0.03 | 0.029 |
| C12 | Blue | 0.48  | 4 | 6  | 0.06 | 0.035 |
| C12 | Blue | 0.48  | 4 | 7  | 0.18 | 0.042 |
| C12 | Blue | 0.48  | 4 | 8  | 0.07 | 0.019 |
| C12 | Blue | 0.48  | 4 | 9  | 0.10 | 0.013 |
| C12 | Blue | 0.48  | 4 | 10 | 0.08 | 0.015 |
| C12 | Blue | 0.48  | 4 | 11 | 0.10 | 0.018 |
| C12 | Blue | 0.48  | 4 | 12 | 0.15 | 0.026 |
| D1  | Blue | -0.65 | 2 | 1  | 0.00 | 0.014 |
| D1  | Blue | -0.65 | 2 | 2  | 0.17 | 0.026 |



|    |      |       |   |    |      |        |
|----|------|-------|---|----|------|--------|
| D1 | Blue | -0.65 | 2 | 3  | 0.00 | 0.046  |
| D1 | Blue | -0.65 | 2 | 4  | 0.00 | 0.027  |
| D1 | Blue | -0.65 | 2 | 5  | 0.01 | 0.068  |
| D1 | Blue | -0.65 | 2 | 6  | 0.00 | 0.051  |
| D1 | Blue | -0.65 | 2 | 7  | 0.16 | 0.040  |
| D1 | Blue | -0.65 | 2 | 8  | 0.06 | 0.059  |
| D1 | Blue | -0.65 | 2 | 9  | 0.07 | 0.033  |
| D1 | Blue | -0.65 | 2 | 10 | 0.08 | -0.015 |
| D1 | Blue | -0.65 | 2 | 11 | 0.06 | 0.032  |
| D1 | Blue | -0.65 | 2 | 12 | 0.29 | 0.043  |
| D2 | Blue | 0.22  | 2 | 1  | 0.00 | 0.046  |
| D2 | Blue | 0.22  | 2 | 2  | 0.00 | 0.040  |
| D2 | Blue | 0.22  | 2 | 3  | 0.00 | 0.042  |
| D2 | Blue | 0.22  | 2 | 4  | 0.00 | 0.039  |
| D2 | Blue | 0.22  | 2 | 5  | 0.00 | 0.048  |
| D2 | Blue | 0.22  | 2 | 6  | 0.00 | 0.067  |
| D2 | Blue | 0.22  | 2 | 7  | 0.00 | 0.073  |
| D2 | Blue | 0.22  | 2 | 8  | 0.00 | 0.072  |
| D2 | Blue | 0.22  | 2 | 9  | 0.00 | 0.048  |
| D2 | Blue | 0.22  | 2 | 10 | 0.14 | 0.062  |
| D2 | Blue | 0.22  | 2 | 11 | 0.00 | 0.027  |
| D2 | Blue | 0.22  | 2 | 12 | 0.00 | 0.039  |
| D3 | Blue | 0.02  | 2 | 1  | 0.25 | 0.052  |
| D3 | Blue | 0.02  | 2 | 2  | 0.24 | 0.046  |
| D3 | Blue | 0.02  | 2 | 3  | 0.23 | 0.057  |
| D3 | Blue | 0.02  | 2 | 4  | 0.26 | 0.053  |
| D3 | Blue | 0.02  | 2 | 5  | 0.20 | 0.064  |
| D3 | Blue | 0.02  | 2 | 6  | 0.20 | 0.067  |
| D3 | Blue | 0.02  | 2 | 7  | 0.35 | 0.062  |
| D3 | Blue | 0.02  | 2 | 8  | 0.23 | 0.067  |
| D3 | Blue | 0.02  | 2 | 9  | 0.23 | 0.052  |
| D3 | Blue | 0.02  | 2 | 10 | 0.25 | 0.050  |
| D3 | Blue | 0.02  | 2 | 11 | 0.24 | 0.053  |
| D3 | Blue | 0.02  | 2 | 12 | 0.31 | 0.066  |
| D4 | Blue | 0.07  | 2 | 1  | 0.05 | 0.029  |
| D4 | Blue | 0.07  | 2 | 2  | 0.10 | 0.035  |
| D4 | Blue | 0.07  | 2 | 3  | 0.09 | 0.037  |
| D4 | Blue | 0.07  | 2 | 4  | 0.14 | 0.046  |
| D4 | Blue | 0.07  | 2 | 5  | 0.17 | 0.034  |
| D4 | Blue | 0.07  | 2 | 6  | 0.00 | 0.052  |
| D4 | Blue | 0.07  | 2 | 7  | 0.15 | 0.029  |
| D4 | Blue | 0.07  | 2 | 8  | 0.06 | 0.037  |
| D4 | Blue | 0.07  | 2 | 9  | 0.04 | 0.043  |
| D4 | Blue | 0.07  | 2 | 10 | 0.06 | 0.031  |
| D4 | Blue | 0.07  | 2 | 11 | 0.06 | 0.053  |
| D4 | Blue | 0.07  | 2 | 12 | 0.24 | 0.034  |
| D5 | Blue | 0.43  | 2 | 1  | 0.15 | 0.016  |
| D5 | Blue | 0.43  | 2 | 2  | 0.11 | 0.008  |
| D5 | Blue | 0.43  | 2 | 3  | 0.13 | 0.035  |
| D5 | Blue | 0.43  | 2 | 4  | 0.14 | 0.021  |
| D5 | Blue | 0.43  | 2 | 5  | 0.16 | 0.024  |
| D5 | Blue | 0.43  | 2 | 6  | 0.15 | 0.056  |
| D5 | Blue | 0.43  | 2 | 7  | 0.32 | 0.101  |

|     |      |       |   |    |      |        |
|-----|------|-------|---|----|------|--------|
| D5  | Blue | 0.43  | 2 | 8  | 0.17 | 0.058  |
| D5  | Blue | 0.43  | 2 | 9  | 0.17 | 0.034  |
| D5  | Blue | 0.43  | 2 | 10 | 0.20 | 0.019  |
| D5  | Blue | 0.43  | 2 | 11 | 0.22 | 0.008  |
| D5  | Blue | 0.43  | 2 | 12 | 0.16 | 0.021  |
| D6  | Blue | 0.49  | 2 | 1  | 0.15 | 0.061  |
| D6  | Blue | 0.49  | 2 | 2  | 0.13 | 0.055  |
| D6  | Blue | 0.49  | 2 | 3  | 0.12 | 0.077  |
| D6  | Blue | 0.49  | 2 | 4  | 0.08 | 0.074  |
| D6  | Blue | 0.49  | 2 | 5  | 0.20 | 0.087  |
| D6  | Blue | 0.49  | 2 | 6  | 0.07 | 0.118  |
| D6  | Blue | 0.49  | 2 | 7  | 0.28 | 0.119  |
| D6  | Blue | 0.49  | 2 | 8  | 0.12 | 0.080  |
| D6  | Blue | 0.49  | 2 | 9  | 0.15 | 0.083  |
| D6  | Blue | 0.49  | 2 | 10 | 0.13 | 0.084  |
| D6  | Blue | 0.49  | 2 | 11 | 0.16 | 0.078  |
| D6  | Blue | 0.49  | 2 | 12 | 0.20 | 0.094  |
| D7  | Blue | 0.05  | 2 | 1  | 0.32 | 0.055  |
| D7  | Blue | 0.05  | 2 | 2  | 0.61 | 0.045  |
| D7  | Blue | 0.05  | 2 | 3  | 0.32 | 0.063  |
| D7  | Blue | 0.05  | 2 | 4  | 0.23 | 0.052  |
| D7  | Blue | 0.05  | 2 | 5  | 0.29 | 0.041  |
| D7  | Blue | 0.05  | 2 | 6  | 0.21 | 0.050  |
| D7  | Blue | 0.05  | 2 | 7  | 0.36 | 0.067  |
| D7  | Blue | 0.05  | 2 | 8  | 0.28 | 0.039  |
| D7  | Blue | 0.05  | 2 | 9  | 0.29 | 0.034  |
| D7  | Blue | 0.05  | 2 | 10 | 0.26 | 0.042  |
| D7  | Blue | 0.05  | 2 | 11 | 0.26 | 0.071  |
| D7  | Blue | 0.05  | 2 | 12 | 0.32 | 0.045  |
| D9  | Blue | 0.29  | 2 | 1  | 0.22 | 0.009  |
| D9  | Blue | 0.29  | 2 | 2  | 0.12 | 0.003  |
| D9  | Blue | 0.29  | 2 | 3  | 0.08 | 0.029  |
| D9  | Blue | 0.29  | 2 | 4  | 0.08 | 0.010  |
| D9  | Blue | 0.29  | 2 | 5  | 0.04 | -0.005 |
| D9  | Blue | 0.29  | 2 | 6  | 0.23 | 0.024  |
| D9  | Blue | 0.29  | 2 | 7  | 0.09 | 0.013  |
| D9  | Blue | 0.29  | 2 | 8  | 0.11 | 0.005  |
| D9  | Blue | 0.29  | 2 | 9  | 0.25 | -0.012 |
| D9  | Blue | 0.29  | 2 | 10 | 0.17 | 0.021  |
| D9  | Blue | 0.29  | 2 | 11 | 0.34 | 0.001  |
| D9  | Blue | 0.29  | 2 | 12 | 0.11 | 0.033  |
| D10 | Blue | -0.14 | 2 | 1  | 0.03 | -0.006 |
| D10 | Blue | -0.14 | 2 | 2  | 0.01 | 0.023  |
| D10 | Blue | -0.14 | 2 | 3  | 0.00 | 0.030  |
| D10 | Blue | -0.14 | 2 | 4  | 0.03 | 0.012  |
| D10 | Blue | -0.14 | 2 | 5  | 0.00 | 0.046  |
| D10 | Blue | -0.14 | 2 | 6  | 0.00 | 0.073  |
| D10 | Blue | -0.14 | 2 | 7  | 0.13 | 0.109  |
| D10 | Blue | -0.14 | 2 | 8  | 0.00 | 0.062  |
| D10 | Blue | -0.14 | 2 | 9  | 0.02 | 0.032  |
| D10 | Blue | -0.14 | 2 | 10 | 0.04 | 0.119  |
| D10 | Blue | -0.14 | 2 | 11 | 0.04 | 0.028  |
| D10 | Blue | -0.14 | 2 | 12 | 0.07 | 0.050  |

|     |       |       |   |    |      |       |
|-----|-------|-------|---|----|------|-------|
| D11 | Blue  | 0.14  | 2 | 1  | 0.00 | 0.017 |
| D11 | Blue  | 0.14  | 2 | 2  | 0.00 | 0.023 |
| D11 | Blue  | 0.14  | 2 | 3  | 0.00 | 0.030 |
| D11 | Blue  | 0.14  | 2 | 4  | 0.00 | 0.027 |
| D11 | Blue  | 0.14  | 2 | 5  | 0.00 | 0.038 |
| D11 | Blue  | 0.14  | 2 | 6  | 0.00 | 0.064 |
| D11 | Blue  | 0.14  | 2 | 7  | 0.00 | 0.105 |
| D11 | Blue  | 0.14  | 2 | 8  | 0.00 | 0.047 |
| D11 | Blue  | 0.14  | 2 | 9  | 0.00 | 0.021 |
| D11 | Blue  | 0.14  | 2 | 10 | 0.00 | 0.094 |
| D11 | Blue  | 0.14  | 2 | 11 | 0.00 | 0.012 |
| D11 | Blue  | 0.14  | 2 | 12 | 0.00 | 0.029 |
| D12 | Blue  | 0.19  | 2 | 1  | 0.11 | 0.030 |
| D12 | Blue  | 0.19  | 2 | 2  | 0.04 | 0.046 |
| D12 | Blue  | 0.19  | 2 | 3  | 0.04 | 0.047 |
| D12 | Blue  | 0.19  | 2 | 4  | 0.02 | 0.034 |
| D12 | Blue  | 0.19  | 2 | 5  | 0.04 | 0.065 |
| D12 | Blue  | 0.19  | 2 | 6  | 0.00 | 0.052 |
| D12 | Blue  | 0.19  | 2 | 7  | 0.17 | 0.090 |
| D12 | Blue  | 0.19  | 2 | 8  | 0.03 | 0.059 |
| D12 | Blue  | 0.19  | 2 | 9  | 0.08 | 0.042 |
| D12 | Blue  | 0.19  | 2 | 10 | 0.10 | 0.068 |
| D12 | Blue  | 0.19  | 2 | 11 | 0.13 | 0.032 |
| D12 | Blue  | 0.19  | 2 | 12 | 0.11 | 0.060 |
| E1  | Beige | 0.91  | 2 | 1  | 0.00 | 0.022 |
| E1  | Beige | 0.91  | 2 | 2  | 0.31 | 0.020 |
| E1  | Beige | 0.91  | 2 | 3  | 0.16 | 0.023 |
| E1  | Beige | 0.91  | 2 | 4  | 0.08 | 0.030 |
| E1  | Beige | 0.91  | 2 | 5  | 0.14 | 0.028 |
| E1  | Beige | 0.91  | 2 | 6  | 0.21 | 0.037 |
| E1  | Beige | 0.91  | 2 | 7  | 0.33 | 0.079 |
| E1  | Beige | 0.91  | 2 | 8  | 0.16 | 0.042 |
| E1  | Beige | 0.91  | 2 | 9  | 0.17 | 0.022 |
| E1  | Beige | 0.91  | 2 | 10 | 0.18 | 0.061 |
| E1  | Beige | 0.91  | 2 | 11 | 0.18 | 0.030 |
| E1  | Beige | 0.91  | 2 | 12 | 0.40 | 0.023 |
| E2  | Beige | 0.38  | 2 | 1  | 0.00 | 0.083 |
| E2  | Beige | 0.38  | 2 | 2  | 0.44 | 0.024 |
| E2  | Beige | 0.38  | 2 | 3  | 0.20 | 0.027 |
| E2  | Beige | 0.38  | 2 | 4  | 0.11 | 0.017 |
| E2  | Beige | 0.38  | 2 | 5  | 0.23 | 0.039 |
| E2  | Beige | 0.38  | 2 | 6  | 0.11 | 0.021 |
| E2  | Beige | 0.38  | 2 | 7  | 0.23 | 0.022 |
| E2  | Beige | 0.38  | 2 | 8  | 0.13 | 0.021 |
| E2  | Beige | 0.38  | 2 | 9  | 0.11 | 0.048 |
| E2  | Beige | 0.38  | 2 | 10 | 0.12 | 0.010 |
| E2  | Beige | 0.38  | 2 | 11 | 0.13 | 0.015 |
| E2  | Beige | 0.38  | 2 | 12 | 0.60 | 0.044 |
| E3  | Beige | -0.37 | 4 | 1  | 0.07 | 0.020 |
| E3  | Beige | -0.37 | 4 | 2  | 0.05 | 0.014 |
| E3  | Beige | -0.37 | 4 | 3  | 0.07 | 0.028 |
| E3  | Beige | -0.37 | 4 | 4  | 0.05 | 0.004 |
| E3  | Beige | -0.37 | 4 | 5  | 0.04 | 0.023 |

|    |       |       |   |    |      |       |
|----|-------|-------|---|----|------|-------|
| E3 | Beige | -0.37 | 4 | 6  | 0.05 | 0.041 |
| E3 | Beige | -0.37 | 4 | 7  | 0.15 | 0.072 |
| E3 | Beige | -0.37 | 4 | 8  | 0.09 | 0.029 |
| E3 | Beige | -0.37 | 4 | 9  | 0.10 | 0.021 |
| E3 | Beige | -0.37 | 4 | 10 | 0.14 | 0.079 |
| E3 | Beige | -0.37 | 4 | 11 | 0.14 | 0.023 |
| E3 | Beige | -0.37 | 4 | 12 | 0.13 | 0.040 |
| E4 | Beige | 0.14  | 4 | 1  | 0.01 | 0.083 |
| E4 | Beige | 0.14  | 4 | 2  | 0.03 | 0.074 |
| E4 | Beige | 0.14  | 4 | 3  | 0.00 | 0.064 |
| E4 | Beige | 0.14  | 4 | 4  | 0.00 | 0.066 |
| E4 | Beige | 0.14  | 4 | 5  | 0.03 | 0.084 |
| E4 | Beige | 0.14  | 4 | 6  | 0.00 | 0.106 |
| E4 | Beige | 0.14  | 4 | 7  | 0.09 | 0.075 |
| E4 | Beige | 0.14  | 4 | 8  | 0.03 | 0.095 |
| E4 | Beige | 0.14  | 4 | 9  | 0.03 | 0.077 |
| E4 | Beige | 0.14  | 4 | 10 | 0.04 | 0.092 |
| E4 | Beige | 0.14  | 4 | 11 | 0.08 | 0.066 |
| E4 | Beige | 0.14  | 4 | 12 | 0.14 | 0.090 |
| E5 | Beige | 0.12  | 4 | 1  | 0.01 | 0.038 |
| E5 | Beige | 0.12  | 4 | 2  | 0.27 | 0.057 |
| E5 | Beige | 0.12  | 4 | 3  | 0.09 | 0.063 |
| E5 | Beige | 0.12  | 4 | 4  | 0.00 | 0.044 |
| E5 | Beige | 0.12  | 4 | 5  | 0.13 | 0.063 |
| E5 | Beige | 0.12  | 4 | 6  | 0.00 | 0.081 |
| E5 | Beige | 0.12  | 4 | 7  | 0.03 | 0.075 |
| E5 | Beige | 0.12  | 4 | 8  | 0.00 | 0.062 |
| E5 | Beige | 0.12  | 4 | 9  | 0.00 | 0.046 |
| E5 | Beige | 0.12  | 4 | 10 | 0.12 | 0.096 |
| E5 | Beige | 0.12  | 4 | 11 | 0.00 | 0.047 |
| E5 | Beige | 0.12  | 4 | 12 | 0.22 | 0.065 |
| E6 | Beige | -0.24 | 2 | 1  | 0.05 | 0.016 |
| E6 | Beige | -0.24 | 2 | 2  | 0.08 | 0.007 |
| E6 | Beige | -0.24 | 2 | 3  | 0.00 | 0.021 |
| E6 | Beige | -0.24 | 2 | 4  | 0.00 | 0.010 |
| E6 | Beige | -0.24 | 2 | 5  | 0.00 | 0.008 |
| E6 | Beige | -0.24 | 2 | 6  | 0.00 | 0.013 |
| E6 | Beige | -0.24 | 2 | 7  | 0.19 | 0.013 |
| E6 | Beige | -0.24 | 2 | 8  | 0.08 | 0.005 |
| E6 | Beige | -0.24 | 2 | 9  | 0.08 | 0.004 |
| E6 | Beige | -0.24 | 2 | 10 | 0.09 | 0.005 |
| E6 | Beige | -0.24 | 2 | 11 | 0.06 | 0.013 |
| E6 | Beige | -0.24 | 2 | 12 | 0.06 | 0.021 |
| E7 | Beige | 0.14  | 2 | 1  | 0.13 | 0.055 |
| E7 | Beige | 0.14  | 2 | 2  | 0.32 | 0.033 |
| E7 | Beige | 0.14  | 2 | 3  | 0.16 | 0.037 |
| E7 | Beige | 0.14  | 2 | 4  | 0.09 | 0.031 |
| E7 | Beige | 0.14  | 2 | 5  | 0.16 | 0.039 |
| E7 | Beige | 0.14  | 2 | 6  | 0.08 | 0.059 |
| E7 | Beige | 0.14  | 2 | 7  | 0.19 | 0.058 |
| E7 | Beige | 0.14  | 2 | 8  | 0.12 | 0.051 |
| E7 | Beige | 0.14  | 2 | 9  | 0.12 | 0.060 |
| E7 | Beige | 0.14  | 2 | 10 | 0.11 | 0.064 |

|     |       |       |   |    |      |       |
|-----|-------|-------|---|----|------|-------|
| E7  | Beige | 0.14  | 2 | 11 | 0.16 | 0.045 |
| E7  | Beige | 0.14  | 2 | 12 | 0.47 | 0.058 |
| E8  | Beige | 0.37  | 2 | 1  | 0.27 | 0.041 |
| E8  | Beige | 0.37  | 2 | 2  | 0.71 | 0.030 |
| E8  | Beige | 0.37  | 2 | 3  | 0.36 | 0.028 |
| E8  | Beige | 0.37  | 2 | 4  | 0.25 | 0.027 |
| E8  | Beige | 0.37  | 2 | 5  | 0.26 | 0.031 |
| E8  | Beige | 0.37  | 2 | 6  | 0.14 | 0.022 |
| E8  | Beige | 0.37  | 2 | 7  | 0.32 | 0.015 |
| E8  | Beige | 0.37  | 2 | 8  | 0.15 | 0.031 |
| E8  | Beige | 0.37  | 2 | 9  | 0.16 | 0.038 |
| E8  | Beige | 0.37  | 2 | 10 | 0.17 | 0.011 |
| E8  | Beige | 0.37  | 2 | 11 | 0.15 | 0.031 |
| E8  | Beige | 0.37  | 2 | 12 | 0.58 | 0.046 |
| E9  | Beige | 0.41  | 4 | 1  | 0.10 | 0.056 |
| E9  | Beige | 0.41  | 4 | 2  | 0.45 | 0.045 |
| E9  | Beige | 0.41  | 4 | 3  | 0.20 | 0.046 |
| E9  | Beige | 0.41  | 4 | 4  | 0.11 | 0.052 |
| E9  | Beige | 0.41  | 4 | 5  | 0.27 | 0.044 |
| E9  | Beige | 0.41  | 4 | 6  | 0.20 | 0.048 |
| E9  | Beige | 0.41  | 4 | 7  | 0.09 | 0.050 |
| E9  | Beige | 0.41  | 4 | 8  | 0.13 | 0.042 |
| E9  | Beige | 0.41  | 4 | 9  | 0.17 | 0.058 |
| E9  | Beige | 0.41  | 4 | 10 | 0.16 | 0.043 |
| E9  | Beige | 0.41  | 4 | 11 | 0.16 | 0.057 |
| E9  | Beige | 0.41  | 4 | 12 | 0.32 | 0.066 |
| E10 | Beige | -0.27 | 4 | 1  | 0.14 | 0.041 |
| E10 | Beige | -0.27 | 4 | 2  | 0.41 | 0.048 |
| E10 | Beige | -0.27 | 4 | 3  | 0.20 | 0.055 |
| E10 | Beige | -0.27 | 4 | 4  | 0.11 | 0.052 |
| E10 | Beige | -0.27 | 4 | 5  | 0.19 | 0.049 |
| E10 | Beige | -0.27 | 4 | 6  | 0.08 | 0.046 |
| E10 | Beige | -0.27 | 4 | 7  | 0.18 | 0.040 |
| E10 | Beige | -0.27 | 4 | 8  | 0.13 | 0.050 |
| E10 | Beige | -0.27 | 4 | 9  | 0.12 | 0.048 |
| E10 | Beige | -0.27 | 4 | 10 | 0.10 | 0.029 |
| E10 | Beige | -0.27 | 4 | 11 | 0.15 | 0.043 |
| E10 | Beige | -0.27 | 4 | 12 | 0.39 | 0.066 |
| E11 | Beige | 0.58  | 4 | 1  | 0.04 | 0.062 |
| E11 | Beige | 0.58  | 4 | 2  | 0.55 | 0.051 |
| E11 | Beige | 0.58  | 4 | 3  | 0.19 | 0.054 |
| E11 | Beige | 0.58  | 4 | 4  | 0.05 | 0.053 |
| E11 | Beige | 0.58  | 4 | 5  | 0.31 | 0.048 |
| E11 | Beige | 0.58  | 4 | 6  | 0.05 | 0.032 |
| E11 | Beige | 0.58  | 4 | 7  | 0.16 | 0.044 |
| E11 | Beige | 0.58  | 4 | 8  | 0.07 | 0.038 |
| E11 | Beige | 0.58  | 4 | 9  | 0.03 | 0.058 |
| E11 | Beige | 0.58  | 4 | 10 | 0.06 | 0.028 |
| E11 | Beige | 0.58  | 4 | 11 | 0.09 | 0.037 |
| E11 | Beige | 0.58  | 4 | 12 | 0.59 | 0.052 |
| E12 | Beige | 0.79  | 4 | 1  | 0.10 | 0.062 |
| E12 | Beige | 0.79  | 4 | 2  | 0.28 | 0.041 |
| E12 | Beige | 0.79  | 4 | 3  | 0.23 | 0.057 |

|     |       |       |   |    |      |       |
|-----|-------|-------|---|----|------|-------|
| E12 | Beige | 0.79  | 4 | 4  | 0.09 | 0.048 |
| E12 | Beige | 0.79  | 4 | 5  | 0.13 | 0.052 |
| E12 | Beige | 0.79  | 4 | 6  | 0.05 | 0.059 |
| E12 | Beige | 0.79  | 4 | 7  | 0.20 | 0.066 |
| E12 | Beige | 0.79  | 4 | 8  | 0.08 | 0.065 |
| E12 | Beige | 0.79  | 4 | 9  | 0.07 | 0.068 |
| E12 | Beige | 0.79  | 4 | 10 | 0.09 | 0.068 |
| E12 | Beige | 0.79  | 4 | 11 | 0.08 | 0.065 |
| E12 | Beige | 0.79  | 4 | 12 | 0.36 | 0.088 |
| F1  | Blue  | 0.08  | 2 | 1  | 0.15 | 0.005 |
| F1  | Blue  | 0.08  | 2 | 2  | 0.19 | 0.009 |
| F1  | Blue  | 0.08  | 2 | 3  | 0.12 | 0.044 |
| F1  | Blue  | 0.08  | 2 | 4  | 0.15 | 0.023 |
| F1  | Blue  | 0.08  | 2 | 5  | 0.10 | 0.029 |
| F1  | Blue  | 0.08  | 2 | 6  | 0.09 | 0.049 |
| F1  | Blue  | 0.08  | 2 | 7  | 0.31 | 0.097 |
| F1  | Blue  | 0.08  | 2 | 8  | 0.17 | 0.022 |
| F1  | Blue  | 0.08  | 2 | 9  | 0.19 | 0.026 |
| F1  | Blue  | 0.08  | 2 | 10 | 0.17 | 0.104 |
| F1  | Blue  | 0.08  | 2 | 11 | 0.45 | 0.001 |
| F1  | Blue  | 0.08  | 2 | 12 | 0.36 | 0.068 |
| F2  | Beige | 0.32  | 2 | 1  | 0.00 | 0.044 |
| F2  | Beige | 0.32  | 2 | 2  | 0.50 | 0.039 |
| F2  | Beige | 0.32  | 2 | 3  | 0.07 | 0.056 |
| F2  | Beige | 0.32  | 2 | 4  | 0.00 | 0.054 |
| F2  | Beige | 0.32  | 2 | 5  | 0.11 | 0.054 |
| F2  | Beige | 0.32  | 2 | 6  | 0.00 | 0.075 |
| F2  | Beige | 0.32  | 2 | 7  | 0.00 | 0.055 |
| F2  | Beige | 0.32  | 2 | 8  | 0.00 | 0.056 |
| F2  | Beige | 0.32  | 2 | 9  | 0.00 | 0.055 |
| F2  | Beige | 0.32  | 2 | 10 | 0.00 | 0.089 |
| F2  | Beige | 0.32  | 2 | 11 | 0.02 | 0.076 |
| F2  | Beige | 0.32  | 2 | 12 | 0.51 | 0.066 |
| F3  | Beige | -0.41 | 4 | 1  | 0.03 | 0.046 |
| F3  | Beige | -0.41 | 4 | 2  | 0.03 | 0.041 |
| F3  | Beige | -0.41 | 4 | 3  | 0.04 | 0.032 |
| F3  | Beige | -0.41 | 4 | 4  | 0.05 | 0.040 |
| F3  | Beige | -0.41 | 4 | 5  | 0.01 | 0.064 |
| F3  | Beige | -0.41 | 4 | 6  | 0.00 | 0.071 |
| F3  | Beige | -0.41 | 4 | 7  | 0.13 | 0.065 |
| F3  | Beige | -0.41 | 4 | 8  | 0.03 | 0.073 |
| F3  | Beige | -0.41 | 4 | 9  | 0.08 | 0.057 |
| F3  | Beige | -0.41 | 4 | 10 | 0.08 | 0.064 |
| F3  | Beige | -0.41 | 4 | 11 | 0.11 | 0.052 |
| F3  | Beige | -0.41 | 4 | 12 | 0.09 | 0.069 |
| F4  | Beige | 0.13  | 2 | 1  | 0.05 | 0.061 |
| F4  | Beige | 0.13  | 2 | 2  | 0.00 | 0.053 |
| F4  | Beige | 0.13  | 2 | 3  | 0.00 | 0.070 |
| F4  | Beige | 0.13  | 2 | 4  | 0.00 | 0.044 |
| F4  | Beige | 0.13  | 2 | 5  | 0.00 | 0.084 |
| F4  | Beige | 0.13  | 2 | 6  | 0.00 | 0.082 |
| F4  | Beige | 0.13  | 2 | 7  | 0.11 | 0.040 |
| F4  | Beige | 0.13  | 2 | 8  | 0.00 | 0.057 |

|    |       |      |   |    |      |        |
|----|-------|------|---|----|------|--------|
| F4 | Beige | 0.13 | 2 | 9  | 0.04 | 0.063  |
| F4 | Beige | 0.13 | 2 | 10 | 0.04 | 0.080  |
| F4 | Beige | 0.13 | 2 | 11 | 0.03 | 0.075  |
| F4 | Beige | 0.13 | 2 | 12 | 0.02 | 0.092  |
| F5 | Beige | 0.21 | 2 | 1  | 0.09 | 0.037  |
| F5 | Beige | 0.21 | 2 | 2  | 0.05 | 0.042  |
| F5 | Beige | 0.21 | 2 | 3  | 0.00 | 0.044  |
| F5 | Beige | 0.21 | 2 | 4  | 0.11 | 0.039  |
| F5 | Beige | 0.21 | 2 | 5  | 0.00 | 0.053  |
| F5 | Beige | 0.21 | 2 | 6  | 0.00 | 0.054  |
| F5 | Beige | 0.21 | 2 | 7  | 0.11 | 0.059  |
| F5 | Beige | 0.21 | 2 | 8  | 0.06 | 0.057  |
| F5 | Beige | 0.21 | 2 | 9  | 0.06 | 0.049  |
| F5 | Beige | 0.21 | 2 | 10 | 0.06 | 0.092  |
| F5 | Beige | 0.21 | 2 | 11 | 0.06 | 0.058  |
| F5 | Beige | 0.21 | 2 | 12 | 0.06 | 0.051  |
| F6 | Beige | 0.75 | 4 | 1  | 0.16 | 0.010  |
| F6 | Beige | 0.75 | 4 | 2  | 0.19 | 0.021  |
| F6 | Beige | 0.75 | 4 | 3  | 0.06 | 0.051  |
| F6 | Beige | 0.75 | 4 | 4  | 0.11 | 0.041  |
| F6 | Beige | 0.75 | 4 | 5  | 0.08 | 0.043  |
| F6 | Beige | 0.75 | 4 | 6  | 0.09 | 0.058  |
| F6 | Beige | 0.75 | 4 | 7  | 0.24 | 0.078  |
| F6 | Beige | 0.75 | 4 | 8  | 0.16 | 0.046  |
| F6 | Beige | 0.75 | 4 | 9  | 0.16 | 0.029  |
| F6 | Beige | 0.75 | 4 | 10 | 0.24 | 0.062  |
| F6 | Beige | 0.75 | 4 | 11 | 0.29 | 0.071  |
| F6 | Beige | 0.75 | 4 | 12 | 0.33 | 0.044  |
| F7 | Beige | 0.16 | 2 | 1  | 0.09 | 0.061  |
| F7 | Beige | 0.16 | 2 | 2  | 0.56 | 0.090  |
| F7 | Beige | 0.16 | 2 | 3  | 0.21 | 0.098  |
| F7 | Beige | 0.16 | 2 | 4  | 0.12 | 0.096  |
| F7 | Beige | 0.16 | 2 | 5  | 0.19 | 0.077  |
| F7 | Beige | 0.16 | 2 | 6  | 0.08 | 0.085  |
| F7 | Beige | 0.16 | 2 | 7  | 0.23 | 0.085  |
| F7 | Beige | 0.16 | 2 | 8  | 0.12 | 0.114  |
| F7 | Beige | 0.16 | 2 | 9  | 0.10 | 0.067  |
| F7 | Beige | 0.16 | 2 | 10 | 0.11 | 0.091  |
| F7 | Beige | 0.16 | 2 | 11 | 0.20 | 0.106  |
| F7 | Beige | 0.16 | 2 | 12 | 0.59 | 0.104  |
| F8 | Beige | 2.51 | 2 | 1  | 0.04 | 0.012  |
| F8 | Beige | 2.51 | 2 | 2  | 0.10 | 0.010  |
| F8 | Beige | 2.51 | 2 | 3  | 0.08 | 0.006  |
| F8 | Beige | 2.51 | 2 | 4  | 0.02 | 0.021  |
| F8 | Beige | 2.51 | 2 | 5  | 0.10 | 0.017  |
| F8 | Beige | 2.51 | 2 | 6  | 0.12 | 0.020  |
| F8 | Beige | 2.51 | 2 | 7  | 0.26 | 0.031  |
| F8 | Beige | 2.51 | 2 | 8  | 0.08 | 0.016  |
| F8 | Beige | 2.51 | 2 | 9  | 0.08 | 0.005  |
| F8 | Beige | 2.51 | 2 | 10 | 0.10 | 0.014  |
| F8 | Beige | 2.51 | 2 | 11 | 0.11 | 0.006  |
| F8 | Beige | 2.51 | 2 | 12 | 0.07 | 0.008  |
| F9 | Beige | 0.52 | 2 | 1  | 0.01 | -0.008 |

|     |       |       |   |    |      |        |
|-----|-------|-------|---|----|------|--------|
| F9  | Beige | 0.52  | 2 | 2  | 0.00 | 0.004  |
| F9  | Beige | 0.52  | 2 | 3  | 0.02 | 0.001  |
| F9  | Beige | 0.52  | 2 | 4  | 0.01 | 0.002  |
| F9  | Beige | 0.52  | 2 | 5  | 0.02 | 0.012  |
| F9  | Beige | 0.52  | 2 | 6  | 0.24 | 0.030  |
| F9  | Beige | 0.52  | 2 | 7  | 0.06 | 0.043  |
| F9  | Beige | 0.52  | 2 | 8  | 0.06 | 0.036  |
| F9  | Beige | 0.52  | 2 | 9  | 0.09 | 0.007  |
| F9  | Beige | 0.52  | 2 | 10 | 0.05 | 0.026  |
| F9  | Beige | 0.52  | 2 | 11 | 0.10 | 0.013  |
| F9  | Beige | 0.52  | 2 | 12 | 0.07 | 0.007  |
| F10 | Beige | 0.68  | 2 | 1  | 0.11 | 0.002  |
| F10 | Beige | 0.68  | 2 | 2  | 0.00 | -0.005 |
| F10 | Beige | 0.68  | 2 | 3  | 0.11 | 0.009  |
| F10 | Beige | 0.68  | 2 | 4  | 0.15 | 0.019  |
| F10 | Beige | 0.68  | 2 | 5  | 0.04 | 0.028  |
| F10 | Beige | 0.68  | 2 | 6  | 0.06 | 0.022  |
| F10 | Beige | 0.68  | 2 | 7  | 0.25 | 0.052  |
| F10 | Beige | 0.68  | 2 | 8  | 0.11 | 0.021  |
| F10 | Beige | 0.68  | 2 | 9  | 0.11 | 0.011  |
| F10 | Beige | 0.68  | 2 | 10 | 0.13 | 0.054  |
| F10 | Beige | 0.68  | 2 | 11 | 0.17 | 0.012  |
| F10 | Beige | 0.68  | 2 | 12 | 0.21 | 0.003  |
| F11 | Beige | 0.03  | 2 | 1  | 0.19 | 0.021  |
| F11 | Beige | 0.03  | 2 | 2  | 0.15 | 0.004  |
| F11 | Beige | 0.03  | 2 | 3  | 0.14 | 0.022  |
| F11 | Beige | 0.03  | 2 | 4  | 0.20 | 0.020  |
| F11 | Beige | 0.03  | 2 | 5  | 0.18 | 0.053  |
| F11 | Beige | 0.03  | 2 | 6  | 0.15 | 0.045  |
| F11 | Beige | 0.03  | 2 | 7  | 0.29 | 0.088  |
| F11 | Beige | 0.03  | 2 | 8  | 0.20 | 0.039  |
| F11 | Beige | 0.03  | 2 | 9  | 0.23 | 0.010  |
| F11 | Beige | 0.03  | 2 | 10 | 0.31 | 0.044  |
| F11 | Beige | 0.03  | 2 | 11 | 0.24 | 0.013  |
| F11 | Beige | 0.03  | 2 | 12 | 0.27 | 0.042  |
| F12 | Blue  | 0.34  | 2 | 1  | 0.22 | 0.019  |
| F12 | Blue  | 0.34  | 2 | 2  | 0.13 | 0.012  |
| F12 | Blue  | 0.34  | 2 | 3  | 0.18 | 0.010  |
| F12 | Blue  | 0.34  | 2 | 4  | 0.19 | -0.005 |
| F12 | Blue  | 0.34  | 2 | 5  | 0.19 | 0.018  |
| F12 | Blue  | 0.34  | 2 | 6  | 0.12 | 0.026  |
| F12 | Blue  | 0.34  | 2 | 7  | 0.27 | 0.086  |
| F12 | Blue  | 0.34  | 2 | 8  | 0.18 | 0.013  |
| F12 | Blue  | 0.34  | 2 | 9  | 0.24 | 0.024  |
| F12 | Blue  | 0.34  | 2 | 10 | 0.17 | 0.038  |
| F12 | Blue  | 0.34  | 2 | 11 | 0.16 | -0.001 |
| F12 | Blue  | 0.34  | 2 | 12 | 0.19 | -0.007 |
| G1  | Beige | -0.19 | 2 | 1  | 0.00 | 0.052  |
| G1  | Beige | -0.19 | 2 | 2  | 0.00 | 0.060  |
| G1  | Beige | -0.19 | 2 | 3  | 0.00 | 0.058  |
| G1  | Beige | -0.19 | 2 | 4  | 0.00 | 0.058  |
| G1  | Beige | -0.19 | 2 | 5  | 0.00 | 0.051  |
| G1  | Beige | -0.19 | 2 | 6  | 0.00 | 0.041  |



|    |       |       |   |    |      |        |
|----|-------|-------|---|----|------|--------|
| G1 | Beige | -0.19 | 2 | 7  | 0.00 | 0.024  |
| G1 | Beige | -0.19 | 2 | 8  | 0.00 | 0.043  |
| G1 | Beige | -0.19 | 2 | 9  | 0.00 | 0.052  |
| G1 | Beige | -0.19 | 2 | 10 | 0.00 | 0.047  |
| G1 | Beige | -0.19 | 2 | 11 | 0.00 | 0.054  |
| G1 | Beige | -0.19 | 2 | 12 | 0.00 | 0.053  |
| G2 | Beige | -1.29 | 2 | 1  | 0.23 | 0.005  |
| G2 | Beige | -1.29 | 2 | 2  | 0.12 | 0.002  |
| G2 | Beige | -1.29 | 2 | 3  | 0.13 | -0.001 |
| G2 | Beige | -1.29 | 2 | 4  | 0.17 | 0.022  |
| G2 | Beige | -1.29 | 2 | 5  | 0.24 | 0.023  |
| G2 | Beige | -1.29 | 2 | 6  | 0.15 | 0.025  |
| G2 | Beige | -1.29 | 2 | 7  | 0.29 | 0.039  |
| G2 | Beige | -1.29 | 2 | 8  | 0.31 | 0.042  |
| G2 | Beige | -1.29 | 2 | 9  | 0.31 | 0.041  |
| G2 | Beige | -1.29 | 2 | 10 | 0.23 | 0.040  |
| G2 | Beige | -1.29 | 2 | 11 | 0.21 | 0.017  |
| G2 | Beige | -1.29 | 2 | 12 | 0.23 | 0.042  |
| G3 | Beige | 0.13  | 2 | 1  | 0.03 | 0.025  |
| G3 | Beige | 0.13  | 2 | 2  | 0.00 | 0.024  |
| G3 | Beige | 0.13  | 2 | 3  | 0.00 | 0.034  |
| G3 | Beige | 0.13  | 2 | 4  | 0.00 | 0.021  |
| G3 | Beige | 0.13  | 2 | 5  | 0.00 | 0.038  |
| G3 | Beige | 0.13  | 2 | 6  | 0.00 | 0.049  |
| G3 | Beige | 0.13  | 2 | 7  | 0.02 | 0.055  |
| G3 | Beige | 0.13  | 2 | 8  | 0.00 | 0.056  |
| G3 | Beige | 0.13  | 2 | 9  | 0.00 | 0.045  |
| G3 | Beige | 0.13  | 2 | 10 | 0.00 | 0.063  |
| G3 | Beige | 0.13  | 2 | 11 | 0.00 | 0.039  |
| G3 | Beige | 0.13  | 2 | 12 | 0.00 | 0.030  |
| G4 | Beige | 0.03  | 2 | 1  | 0.03 | 0.059  |
| G4 | Beige | 0.03  | 2 | 2  | 0.08 | 0.044  |
| G4 | Beige | 0.03  | 2 | 3  | 0.05 | 0.037  |
| G4 | Beige | 0.03  | 2 | 4  | 0.06 | 0.032  |
| G4 | Beige | 0.03  | 2 | 5  | 0.07 | 0.059  |
| G4 | Beige | 0.03  | 2 | 6  | 0.01 | 0.054  |
| G4 | Beige | 0.03  | 2 | 7  | 0.19 | 0.051  |
| G4 | Beige | 0.03  | 2 | 8  | 0.14 | 0.075  |
| G4 | Beige | 0.03  | 2 | 9  | 0.15 | 0.028  |
| G4 | Beige | 0.03  | 2 | 10 | 0.23 | 0.061  |
| G4 | Beige | 0.03  | 2 | 11 | 0.24 | 0.022  |
| G4 | Beige | 0.03  | 2 | 12 | 0.27 | 0.033  |
| G5 | Beige | 0.03  | 2 | 1  | 0.05 | 0.074  |
| G5 | Beige | 0.03  | 2 | 2  | 0.02 | 0.083  |
| G5 | Beige | 0.03  | 2 | 3  | 0.00 | 0.079  |
| G5 | Beige | 0.03  | 2 | 4  | 0.00 | 0.074  |
| G5 | Beige | 0.03  | 2 | 5  | 0.00 | 0.086  |
| G5 | Beige | 0.03  | 2 | 6  | 0.00 | 0.076  |
| G5 | Beige | 0.03  | 2 | 7  | 0.15 | 0.076  |
| G5 | Beige | 0.03  | 2 | 8  | 0.07 | 0.084  |
| G5 | Beige | 0.03  | 2 | 9  | 0.05 | 0.062  |
| G5 | Beige | 0.03  | 2 | 10 | 0.12 | 0.014  |
| G5 | Beige | 0.03  | 2 | 11 | 0.08 | 0.085  |

|     |       |       |   |    |      |       |
|-----|-------|-------|---|----|------|-------|
| G5  | Beige | 0.03  | 2 | 12 | 0.17 | 0.087 |
| G6  | Beige | 0.10  | 2 | 1  | 0.01 | 0.053 |
| G6  | Beige | 0.10  | 2 | 2  | 0.05 | 0.060 |
| G6  | Beige | 0.10  | 2 | 3  | 0.00 | 0.062 |
| G6  | Beige | 0.10  | 2 | 4  | 0.00 | 0.063 |
| G6  | Beige | 0.10  | 2 | 5  | 0.03 | 0.061 |
| G6  | Beige | 0.10  | 2 | 6  | 0.00 | 0.051 |
| G6  | Beige | 0.10  | 2 | 7  | 0.05 | 0.045 |
| G6  | Beige | 0.10  | 2 | 8  | 0.00 | 0.062 |
| G6  | Beige | 0.10  | 2 | 9  | 0.01 | 0.051 |
| G6  | Beige | 0.10  | 2 | 10 | 0.07 | 0.038 |
| G6  | Beige | 0.10  | 2 | 11 | 0.06 | 0.041 |
| G6  | Beige | 0.10  | 2 | 12 | 0.19 | 0.056 |
| G7  | Beige | 0.34  | 2 | 1  | 0.06 | 0.056 |
| G7  | Beige | 0.34  | 2 | 2  | 0.09 | 0.061 |
| G7  | Beige | 0.34  | 2 | 3  | 0.00 | 0.050 |
| G7  | Beige | 0.34  | 2 | 4  | 0.00 | 0.049 |
| G7  | Beige | 0.34  | 2 | 5  | 0.01 | 0.049 |
| G7  | Beige | 0.34  | 2 | 6  | 0.07 | 0.049 |
| G7  | Beige | 0.34  | 2 | 7  | 0.19 | 0.037 |
| G7  | Beige | 0.34  | 2 | 8  | 0.02 | 0.025 |
| G7  | Beige | 0.34  | 2 | 9  | 0.02 | 0.040 |
| G7  | Beige | 0.34  | 2 | 10 | 0.01 | 0.020 |
| G7  | Beige | 0.34  | 2 | 11 | 0.03 | 0.050 |
| G7  | Beige | 0.34  | 2 | 12 | 0.19 | 0.051 |
| G8  | Beige | 0.06  | 2 | 1  | 0.24 | 0.069 |
| G8  | Beige | 0.06  | 2 | 2  | 0.60 | 0.056 |
| G8  | Beige | 0.06  | 2 | 3  | 0.41 | 0.039 |
| G8  | Beige | 0.06  | 2 | 4  | 0.26 | 0.063 |
| G8  | Beige | 0.06  | 2 | 5  | 0.33 | 0.049 |
| G8  | Beige | 0.06  | 2 | 6  | 0.10 | 0.027 |
| G8  | Beige | 0.06  | 2 | 7  | 0.28 | 0.029 |
| G8  | Beige | 0.06  | 2 | 8  | 0.23 | 0.039 |
| G8  | Beige | 0.06  | 2 | 9  | 0.20 | 0.071 |
| G8  | Beige | 0.06  | 2 | 10 | 0.19 | 0.052 |
| G8  | Beige | 0.06  | 2 | 11 | 0.24 | 0.051 |
| G8  | Beige | 0.06  | 2 | 12 | 0.65 | 0.072 |
| G9  | Beige | 1.85  | 2 | 1  | 0.18 | 0.036 |
| G9  | Beige | 1.85  | 2 | 2  | 0.41 | 0.033 |
| G9  | Beige | 1.85  | 2 | 3  | 0.11 | 0.042 |
| G9  | Beige | 1.85  | 2 | 4  | 0.06 | 0.016 |
| G9  | Beige | 1.85  | 2 | 5  | 0.17 | 0.045 |
| G9  | Beige | 1.85  | 2 | 6  | 0.05 | 0.021 |
| G9  | Beige | 1.85  | 2 | 7  | 0.24 | 0.043 |
| G9  | Beige | 1.85  | 2 | 8  | 0.10 | 0.011 |
| G9  | Beige | 1.85  | 2 | 9  | 0.09 | 0.033 |
| G9  | Beige | 1.85  | 2 | 10 | 0.08 | 0.034 |
| G9  | Beige | 1.85  | 2 | 11 | 0.11 | 0.033 |
| G9  | Beige | 1.85  | 2 | 12 | 0.38 | 0.034 |
| G10 | Beige | -0.08 | 2 | 1  | 0.14 | 0.001 |
| G10 | Beige | -0.08 | 2 | 2  | 0.15 | 0.018 |
| G10 | Beige | -0.08 | 2 | 3  | 0.17 | 0.030 |
| G10 | Beige | -0.08 | 2 | 4  | 0.08 | 0.010 |

|     |       |       |   |    |      |       |
|-----|-------|-------|---|----|------|-------|
| G10 | Beige | -0.08 | 2 | 5  | 0.14 | 0.022 |
| G10 | Beige | -0.08 | 2 | 6  | 0.07 | 0.012 |
| G10 | Beige | -0.08 | 2 | 7  | 0.27 | 0.012 |
| G10 | Beige | -0.08 | 2 | 8  | 0.14 | 0.027 |
| G10 | Beige | -0.08 | 2 | 9  | 0.13 | 0.030 |
| G10 | Beige | -0.08 | 2 | 10 | 0.11 | 0.009 |
| G10 | Beige | -0.08 | 2 | 11 | 0.18 | 0.014 |
| G10 | Beige | -0.08 | 2 | 12 | 0.32 | 0.032 |
| G11 | Beige | -0.53 | 2 | 1  | 0.34 | 0.026 |
| G11 | Beige | -0.53 | 2 | 2  | 0.26 | 0.025 |
| G11 | Beige | -0.53 | 2 | 3  | 0.22 | 0.027 |
| G11 | Beige | -0.53 | 2 | 4  | 0.18 | 0.015 |
| G11 | Beige | -0.53 | 2 | 5  | 0.20 | 0.028 |
| G11 | Beige | -0.53 | 2 | 6  | 0.17 | 0.018 |
| G11 | Beige | -0.53 | 2 | 7  | 0.33 | 0.025 |
| G11 | Beige | -0.53 | 2 | 8  | 0.28 | 0.031 |
| G11 | Beige | -0.53 | 2 | 9  | 0.28 | 0.031 |
| G11 | Beige | -0.53 | 2 | 10 | 0.27 | 0.032 |
| G11 | Beige | -0.53 | 2 | 11 | 0.26 | 0.034 |
| G11 | Beige | -0.53 | 2 | 12 | 0.24 | 0.053 |
| G12 | Beige | 1.54  | 2 | 1  | 0.00 | 0.004 |
| G12 | Beige | 1.54  | 2 | 2  | 0.00 | 0.013 |
| G12 | Beige | 1.54  | 2 | 3  | 0.00 | 0.012 |
| G12 | Beige | 1.54  | 2 | 4  | 0.00 | 0.015 |
| G12 | Beige | 1.54  | 2 | 5  | 0.00 | 0.020 |
| G12 | Beige | 1.54  | 2 | 6  | 0.00 | 0.016 |
| G12 | Beige | 1.54  | 2 | 7  | 0.06 | 0.021 |
| G12 | Beige | 1.54  | 2 | 8  | 0.00 | 0.020 |
| G12 | Beige | 1.54  | 2 | 9  | 0.00 | 0.019 |
| G12 | Beige | 1.54  | 2 | 10 | 0.00 | 0.018 |
| G12 | Beige | 1.54  | 2 | 11 | 0.00 | 0.020 |
| G12 | Beige | 1.54  | 2 | 12 | 0.19 | 0.025 |
| H1  | Beige | 0.68  | 2 | 1  | 0.47 | 0.032 |
| H1  | Beige | 0.68  | 2 | 2  | 0.48 | 0.036 |
| H1  | Beige | 0.68  | 2 | 3  | 0.45 | 0.039 |
| H1  | Beige | 0.68  | 2 | 4  | 0.46 | 0.024 |
| H1  | Beige | 0.68  | 2 | 5  | 0.45 | 0.038 |
| H1  | Beige | 0.68  | 2 | 6  | 0.39 | 0.037 |
| H1  | Beige | 0.68  | 2 | 7  | 0.52 | 0.060 |
| H1  | Beige | 0.68  | 2 | 8  | 0.45 | 0.037 |
| H1  | Beige | 0.68  | 2 | 9  | 0.45 | 0.028 |
| H1  | Beige | 0.68  | 2 | 10 | 0.51 | 0.040 |
| H1  | Beige | 0.68  | 2 | 11 | 0.52 | 0.035 |
| H1  | Beige | 0.68  | 2 | 12 | 0.54 | 0.051 |
| H2  | Beige | 0.12  | 2 | 1  | 0.00 | 0.020 |
| H2  | Beige | 0.12  | 2 | 2  | 0.00 | 0.021 |
| H2  | Beige | 0.12  | 2 | 3  | 0.00 | 0.028 |
| H2  | Beige | 0.12  | 2 | 4  | 0.00 | 0.036 |
| H2  | Beige | 0.12  | 2 | 5  | 0.00 | 0.038 |
| H2  | Beige | 0.12  | 2 | 6  | 0.00 | 0.050 |
| H2  | Beige | 0.12  | 2 | 7  | 0.04 | 0.052 |
| H2  | Beige | 0.12  | 2 | 8  | 0.00 | 0.053 |
| H2  | Beige | 0.12  | 2 | 9  | 0.00 | 0.041 |

|    |       |       |   |    |      |        |
|----|-------|-------|---|----|------|--------|
| H2 | Beige | 0.12  | 2 | 10 | 0.00 | 0.033  |
| H2 | Beige | 0.12  | 2 | 11 | 0.00 | 0.015  |
| H2 | Beige | 0.12  | 2 | 12 | 0.00 | 0.026  |
| H3 | Beige | 0.45  | 2 | 1  | 0.41 | 0.015  |
| H3 | Beige | 0.45  | 2 | 2  | 0.41 | 0.021  |
| H3 | Beige | 0.45  | 2 | 3  | 0.37 | 0.036  |
| H3 | Beige | 0.45  | 2 | 4  | 0.42 | 0.032  |
| H3 | Beige | 0.45  | 2 | 5  | 0.35 | 0.032  |
| H3 | Beige | 0.45  | 2 | 6  | 0.39 | 0.031  |
| H3 | Beige | 0.45  | 2 | 7  | 0.45 | 0.050  |
| H3 | Beige | 0.45  | 2 | 8  | 0.44 | 0.023  |
| H3 | Beige | 0.45  | 2 | 9  | 0.38 | 0.015  |
| H3 | Beige | 0.45  | 2 | 10 | 0.44 | 0.040  |
| H3 | Beige | 0.45  | 2 | 11 | 0.42 | 0.040  |
| H3 | Beige | 0.45  | 2 | 12 | 0.51 | 0.029  |
| H4 | Beige | -0.18 | 2 | 1  | 0.00 | -0.012 |
| H4 | Beige | -0.18 | 2 | 2  | 0.00 | 0.000  |
| H4 | Beige | -0.18 | 2 | 3  | 0.00 | 0.006  |
| H4 | Beige | -0.18 | 2 | 4  | 0.00 | 0.013  |
| H4 | Beige | -0.18 | 2 | 5  | 0.00 | 0.012  |
| H4 | Beige | -0.18 | 2 | 6  | 0.00 | 0.027  |
| H4 | Beige | -0.18 | 2 | 7  | 0.00 | 0.030  |
| H4 | Beige | -0.18 | 2 | 8  | 0.00 | 0.034  |
| H4 | Beige | -0.18 | 2 | 9  | 0.00 | 0.023  |
| H4 | Beige | -0.18 | 2 | 10 | 0.00 | 0.029  |
| H4 | Beige | -0.18 | 2 | 11 | 0.00 | 0.006  |
| H4 | Beige | -0.18 | 2 | 12 | 0.00 | 0.010  |
| H5 | Beige | 0.31  | 2 | 1  | 0.00 | 0.020  |
| H5 | Beige | 0.31  | 2 | 2  | 0.18 | 0.018  |
| H5 | Beige | 0.31  | 2 | 3  | 0.00 | 0.025  |
| H5 | Beige | 0.31  | 2 | 4  | 0.00 | 0.034  |
| H5 | Beige | 0.31  | 2 | 5  | 0.00 | 0.056  |
| H5 | Beige | 0.31  | 2 | 6  | 0.00 | 0.050  |
| H5 | Beige | 0.31  | 2 | 7  | 0.05 | 0.069  |
| H5 | Beige | 0.31  | 2 | 8  | 0.00 | 0.061  |
| H5 | Beige | 0.31  | 2 | 9  | 0.00 | 0.047  |
| H5 | Beige | 0.31  | 2 | 10 | 0.00 | 0.065  |
| H5 | Beige | 0.31  | 2 | 11 | 0.00 | 0.059  |
| H5 | Beige | 0.31  | 2 | 12 | 0.20 | 0.036  |
| H6 | Beige | 0.17  | 2 | 1  | 0.04 | 0.006  |
| H6 | Beige | 0.17  | 2 | 2  | 0.00 | 0.008  |
| H6 | Beige | 0.17  | 2 | 3  | 0.00 | 0.017  |
| H6 | Beige | 0.17  | 2 | 4  | 0.00 | 0.014  |
| H6 | Beige | 0.17  | 2 | 5  | 0.00 | 0.017  |
| H6 | Beige | 0.17  | 2 | 6  | 0.00 | 0.015  |
| H6 | Beige | 0.17  | 2 | 7  | 0.18 | 0.067  |
| H6 | Beige | 0.17  | 2 | 8  | 0.04 | 0.040  |
| H6 | Beige | 0.17  | 2 | 9  | 0.03 | 0.021  |
| H6 | Beige | 0.17  | 2 | 10 | 0.10 | 0.043  |
| H6 | Beige | 0.17  | 2 | 11 | 0.06 | 0.020  |
| H6 | Beige | 0.17  | 2 | 12 | 0.12 | 0.049  |
| H7 | Beige | -0.60 | 2 | 1  | 0.00 | 0.022  |
| H7 | Beige | -0.60 | 2 | 2  | 0.00 | 0.023  |

|     |       |       |   |    |      |        |
|-----|-------|-------|---|----|------|--------|
| H7  | Beige | -0.60 | 2 | 3  | 0.00 | 0.035  |
| H7  | Beige | -0.60 | 2 | 4  | 0.00 | 0.029  |
| H7  | Beige | -0.60 | 2 | 5  | 0.00 | 0.032  |
| H7  | Beige | -0.60 | 2 | 6  | 0.00 | 0.050  |
| H7  | Beige | -0.60 | 2 | 7  | 0.00 | 0.054  |
| H7  | Beige | -0.60 | 2 | 8  | 0.00 | 0.060  |
| H7  | Beige | -0.60 | 2 | 9  | 0.00 | 0.049  |
| H7  | Beige | -0.60 | 2 | 10 | 0.00 | 0.051  |
| H7  | Beige | -0.60 | 2 | 11 | 0.00 | 0.036  |
| H7  | Beige | -0.60 | 2 | 12 | 0.00 | 0.039  |
| H8  | Beige | 3.04  | 2 | 1  | 0.13 | 0.040  |
| H8  | Beige | 3.04  | 2 | 2  | 0.11 | 0.016  |
| H8  | Beige | 3.04  | 2 | 3  | 0.04 | 0.040  |
| H8  | Beige | 3.04  | 2 | 4  | 0.01 | 0.062  |
| H8  | Beige | 3.04  | 2 | 5  | 0.01 | 0.023  |
| H8  | Beige | 3.04  | 2 | 6  | 0.00 | 0.031  |
| H8  | Beige | 3.04  | 2 | 7  | 0.22 | 0.035  |
| H8  | Beige | 3.04  | 2 | 8  | 0.07 | 0.063  |
| H8  | Beige | 3.04  | 2 | 9  | 0.05 | 0.022  |
| H8  | Beige | 3.04  | 2 | 10 | 0.04 | 0.025  |
| H8  | Beige | 3.04  | 2 | 11 | 0.04 | 0.078  |
| H8  | Beige | 3.04  | 2 | 12 | 0.14 | 0.022  |
| H9  | Blue  | -0.22 | 2 | 1  | 0.19 | 0.012  |
| H9  | Blue  | -0.22 | 2 | 2  | 0.12 | 0.020  |
| H9  | Blue  | -0.22 | 2 | 3  | 0.15 | 0.002  |
| H9  | Blue  | -0.22 | 2 | 4  | 0.10 | -0.005 |
| H9  | Blue  | -0.22 | 2 | 5  | 0.20 | 0.029  |
| H9  | Blue  | -0.22 | 2 | 6  | 0.11 | 0.037  |
| H9  | Blue  | -0.22 | 2 | 7  | 0.26 | 0.090  |
| H9  | Blue  | -0.22 | 2 | 8  | 0.12 | 0.042  |
| H9  | Blue  | -0.22 | 2 | 9  | 0.14 | 0.020  |
| H9  | Blue  | -0.22 | 2 | 10 | 0.16 | 0.024  |
| H9  | Blue  | -0.22 | 2 | 11 | 0.15 | -0.003 |
| H9  | Blue  | -0.22 | 2 | 12 | 0.16 | -0.001 |
| H10 | Beige | -0.63 | 2 | 1  | 0.15 | 0.011  |
| H10 | Beige | -0.63 | 2 | 2  | 0.11 | 0.015  |
| H10 | Beige | -0.63 | 2 | 3  | 0.11 | 0.022  |
| H10 | Beige | -0.63 | 2 | 4  | 0.10 | 0.009  |
| H10 | Beige | -0.63 | 2 | 5  | 0.08 | 0.043  |
| H10 | Beige | -0.63 | 2 | 6  | 0.12 | 0.028  |
| H10 | Beige | -0.63 | 2 | 7  | 0.24 | 0.089  |
| H10 | Beige | -0.63 | 2 | 8  | 0.10 | 0.038  |
| H10 | Beige | -0.63 | 2 | 9  | 0.16 | 0.040  |
| H10 | Beige | -0.63 | 2 | 10 | 0.20 | 0.005  |
| H10 | Beige | -0.63 | 2 | 11 | 0.20 | -0.010 |
| H10 | Beige | -0.63 | 2 | 12 | 0.16 | 0.022  |
| H12 | Beige | -0.25 | 2 | 1  | 0.09 | 0.023  |
| H12 | Beige | -0.25 | 2 | 2  | 0.13 | 0.032  |
| H12 | Beige | -0.25 | 2 | 3  | 0.05 | 0.029  |
| H12 | Beige | -0.25 | 2 | 4  | 0.02 | 0.024  |
| H12 | Beige | -0.25 | 2 | 5  | 0.00 | 0.019  |
| H12 | Beige | -0.25 | 2 | 6  | 0.00 | 0.018  |
| H12 | Beige | -0.25 | 2 | 7  | 0.12 | 0.037  |

|     |       |       |   |    |      |       |
|-----|-------|-------|---|----|------|-------|
| H12 | Beige | -0.25 | 2 | 8  | 0.01 | 0.015 |
| H12 | Beige | -0.25 | 2 | 9  | 0.00 | 0.026 |
| H12 | Beige | -0.25 | 2 | 10 | 0.05 | 0.027 |
| H12 | Beige | -0.25 | 2 | 11 | 0.00 | 0.045 |
| H12 | Beige | -0.25 | 2 | 12 | 0.00 | 0.020 |

\*Negative enzyme concentrations are the results of no enzyme expression or a failed CO difference spectroscopy assay (repeated in duplicate). Some variants with seemingly negative concentration showed substrate activity, which could indicate very low enzyme concentration that could not be detected with this assay.

**Supplementary Table 5.** Top P450 BM3 variant rankings across all substrates (1-12) combined, according to 4-AAP absorbance results.

| Variant | Identity                               | Overall rank across all substrates |
|---------|----------------------------------------|------------------------------------|
| A5      | F87P                                   | 1                                  |
| H1      | D80N/F81Y/F173P/R255G/Y256H            | 2                                  |
| H3      | L75H/F81Y/F87P/L181P/M212R/R255D/Y256V | 3                                  |
| B8      | F87L/M177H/L181I/R255T/I259G/I263N     | 4                                  |
| D7      | F87S/I259P                             | 5                                  |
| G8      | P172H/Y256K/I263G                      | 6                                  |
| C1      | F87P/A180M/I263G                       | 7                                  |
| D3      | F87L/A180E/A184F/Y256K/I259K           | 8                                  |
| B10     | F81Y/E143D/A180M/M212K                 | 9                                  |
| G11     | A82F                                   | 10                                 |

Supplementary Table 6. Top P450 BM3 variant rankings across each substrate (1-12), according to 4-AAP absorbance results.<sup>a</sup>

| Rank | Substrate                              |                                    |                                        |                                        |                                        |                                         |
|------|----------------------------------------|------------------------------------|----------------------------------------|----------------------------------------|----------------------------------------|-----------------------------------------|
|      | 1                                      | 2                                  | 3                                      | 4                                      | 5                                      | 6                                       |
| 1    | D80N/F81Y/F173P/R255G/Y256H            | F87P/A180M/I263G                   | F87P                                   | F81Y/E143D/A180M/M212K                 | F87P/A180M/I263G                       | L75H/F81Y/F87P/L181P/M212R/R255D/Y256V  |
| 2    | L75H/F81Y/F87P/L181P/M212R/R255D/Y256V | F87P                               | D80N/F81Y/F173P/R255G/Y256H            | D80N/F81Y/F173P/R255G/Y256H            | F87P                                   | D80N/F81Y/F173P/R255G/Y256H             |
| 3    | A82F/L85P                              | G83K                               | F87L/M177H/L181I/R255T/I259G/I263N     | L75H/F81Y/F87P/L181P/M212R/R255D/Y256V | D80N/F81Y/F173P/R255G/Y256H            | F87P                                    |
| 4    | F87S/I259P                             | F87L/M177H/L181I/R255T/I259G/I263N | P172H/Y256K/I263G                      | F87P                                   | F87L/M177H/L181I/R255T/I259G/I263N     | R255G                                   |
| 5    | F87P                                   | F87S/I259P                         | F87P/A180M/I263G                       | F87P/A180M/I263G                       | A184K                                  | F87L/M177H/L181I/R255T/I259G/I263N      |
| 6    | R255G                                  | R255P                              | L75H/F81Y/F87P/L181P/M212R/R255D/Y256V | R255G                                  | L75H/F81Y/F87P/L181P/M212R/R255D/Y256V | F87P/A180M/I263G                        |
| 7    | G83K                                   | P172H/Y256K/I263G                  | G83K                                   | F87L/M177H/L181I/R255T/I259G/I263N     | F87L/L181P/I259P                       | F81R/T87P/F173H/A180W/M212W/I259K/I263H |
| 8    | F87L/M177H/L181I/R255T/I259G/I263N     | F81R/F87G/L180I/I259P              | F87S/I259P                             | P172H/Y256K/I263G                      | P172H/Y256K/I263G                      | R255G/I259G                             |
| 9    | F87L/A180E/A184F/Y256K/I259K           | A180N                              | F81Y/E143D/A180M/M212K                 | F87L/A180E/A184F/Y256K/I259K           | A180N                                  | M212W                                   |
| 10   | P172H/Y256K/I263G                      | A184K                              | F87G                                   | I263G                                  | F87S/I259P                             | F81Y/E143D/A180M/M212K                  |

| Rank | Substrate                              |                                        |                                        |                                        |                                        |                                    |
|------|----------------------------------------|----------------------------------------|----------------------------------------|----------------------------------------|----------------------------------------|------------------------------------|
|      | 7                                      | 8                                      | 9                                      | 10                                     | 11                                     | 12                                 |
| 1    | D80N/F81Y/F173P/R255G/Y256H            | D80N/F81Y/F173P/R255G/Y256H            | D80N/F81Y/F173P/R255G/Y256H            | D80N/F81Y/F173P/R255G/Y256H            | L75H                                   | F87P/A180M/I263G                   |
| 2    | F87P                                   | L75H/F81Y/F87P/L181P/M212R/R255D/Y256V | L75H/F81Y/F87P/L181P/M212R/R255D/Y256V | L75H/F81Y/F87P/L181P/M212R/R255D/Y256V | F87L/M177L/A184K/Y256V                 | F87P                               |
| 3    | L75H/F81Y/F87P/L181P/M212R/R255D/Y256V | F87P                                   | F87P                                   | F87P                                   | R255G                                  | A184K                              |
| 4    | F87L/M177H/L181I/R255T/I259G/I263N     | F81R/F173P/M177H/A180F/I259P           | F81R/F173P/M177H/A180F/I259P           | D80P/F87L/F173E/A184E/I259G/I263H      | D80N/F81Y/F173P/R255G/Y256H            | F173E/A180F/M212R/I263G            |
| 5    | F81Y/E143D/A180M/M212K                 | F87S/I259P                             | F87S/I259P                             | A82F/L85P                              | Y256M                                  | P172H/Y256K/I263G                  |
| 6    | F87S/I259P                             | A82F/L85P                              | A82F/L85P                              | A82Q/M177P/L181F/T256H                 | L75H/F81Y/F87P/L181P/M212R/R255D/Y256V | F87L/M177H/L181I/R255T/I259G/I263N |
| 7    | F87L/A180E/A184F/Y256K/I259K           | A82Q/M177P/L181F/T256H                 | F87P/A180M/I263G                       | F87S/I259P                             | F87P                                   | A82Q                               |
| 8    | F87P/A180M/I263G                       | P172H/Y256K/I263G                      | R255G/I259G                            | F87L/A180E/A184F/Y256K/I259K           | R255G/I259G                            | L71N                               |
| 9    | M212W                                  | F87L/A180E/A184F/Y256K/I259K           | F173E/M177L/L181I/M212R/Y256V/I263S    | F81Y/F173H/A180P                       | F81Y/F173H/A180P                       | A180N                              |
| 10   | A82Q/M177P/L181F/T256H                 | F87L/M177H/L181I/R255T/I259G/I263N     | D80P/F87L/F173E/A184E/I259G/I263H      | F87L/M177H/L181I/R255T/I259G/I263N     | F173E/A180F/M212R/I263G                | F81R/F87G/L180I/I259P              |

<sup>a</sup>The three overall top variants (Supplementary Table 2) are highlighted in blue, black and green, respectively



**Supplementary Table 7.** Variant rankings for substrates **1-12** according to 4-AAP absorbance results for variant A5 – F87P.

| Variant A5 (F87P) |      |
|-------------------|------|
| Substrate         | Rank |
| <b>1</b>          | 5    |
| <b>2</b>          | 2    |
| <b>3</b>          | 1    |
| <b>4</b>          | 4    |
| <b>5</b>          | 2    |
| <b>6</b>          | 3    |
| <b>7</b>          | 2    |
| <b>8</b>          | 3    |
| <b>9</b>          | 3    |
| <b>10</b>         | 3    |
| <b>11</b>         | 7    |
| <b>12</b>         | 2    |

**Supplementary Table 8.** Comparison of rank for 4-AAP absorbance results and NADPH consumption rate for reaction of variant A9 (A184K) with substrates **1-12**. A high and low rank are highlighted with a green to red gradient.

| Substrate | 4-AAP Assay (Rank) | NADPH Consumption Rate (Rank) |
|-----------|--------------------|-------------------------------|
| <b>1</b>  | 46                 | 3                             |
| <b>2</b>  | 10                 | 30                            |
| <b>3</b>  | 11                 | 4                             |
| <b>4</b>  | 12                 | 2                             |
| <b>5</b>  | 5                  | 9                             |
| <b>6</b>  | 14                 | 1                             |
| <b>7</b>  | 20                 | 6                             |
| <b>8</b>  | 26                 | 1                             |
| <b>9</b>  | 27                 | 7                             |
| <b>10</b> | 30                 | 6                             |
| <b>11</b> | 53                 | 3                             |
| <b>12</b> | 3                  | 1                             |

**Supplementary Table 9.** P450 BM3 variant enzyme concentration. The concentrations of the P450 variants in the clarified cell lysate (stock concentration) is shown in descending order. Expression was determined at least in duplicate. For wild-type, n=8.

| Variant               | Phenotype | Variant Identity | Stock [P450] ( $\mu\text{M}$ ) |
|-----------------------|-----------|------------------|--------------------------------|
| His-A82Q <sup>a</sup> | Blue      | A82Q             | 13.0                           |
| B3                    | Blue      | I263Q            | 7.0                            |
| C6                    | Blue      | M177Q            | 7.0                            |
| A4                    | Blue      | A82Q             | 5.0                            |
| A3                    | Blue      | A82E             | 4.5                            |
| A2                    | Blue      | F81R             | 4.5                            |
| A1                    | Blue      | R255G            | 4.4                            |

|                  |       |                                         |     |
|------------------|-------|-----------------------------------------|-----|
| B4               | Blue  | A180E/A184F/M212K/I263S                 | 3.5 |
| H8               | Blue  | I259G                                   | 3.0 |
| A9               | Blue  | A184K                                   | 2.9 |
| B11              | Blue  | F173E/A180F/M212R/I263G                 | 2.9 |
| C2               | Blue  | F87G                                    | 2.8 |
| F8               | Blue  | A82P/F173H/L181I/R255I/T256K/I263Q      | 2.5 |
| G9               | Blue  | M177H/I263S                             | 1.8 |
| A9 <sup>a</sup>  | Blue  | A184K                                   | 1.6 |
| B6               | Blue  | I259P                                   | 1.6 |
| G12              | Blue  | A82F/L181F                              | 1.5 |
| C4               | Blue  | F87P/M212W/Y256H                        | 1.4 |
| C1               | Blue  | F87P/A180M/I263G                        | 1.3 |
| C1 <sup>a</sup>  | Blue  | F87P/A180M/I263G                        | 1.3 |
| B1               | Blue  | L75H                                    | 1.3 |
| A10 <sup>a</sup> | Blue  | M212K                                   | 1.2 |
| A5               | Blue  | F87P                                    | 1.1 |
| B2               | Blue  | I263G                                   | 1.0 |
| B8               | Blue  | F87L/M177H/L181I/R255T/I259G/I263N      | 0.9 |
| A82Q ALI         | Blue  | A82Q                                    | 0.9 |
| B10              | Blue  | F81Y/E143D/A180M/M212K                  | 0.9 |
| E1               | Beige | L71H                                    | 0.9 |
| E12              | Beige | L181N                                   | 0.8 |
| WT               | Beige | N/A                                     | 0.8 |
| A7               | Blue  | A180M                                   | 0.8 |
| F6               | Blue  | F81Y/F173H/A180P                        | 0.7 |
| C5               | Blue  | F87G/A184P/M212W/R255I/I263Q            | 0.7 |
| H1               | Beige | D80N/F81Y/F173P/R255G/Y256H             | 0.7 |
| F10              | Beige | L75R/M177P/A180E/A184K/Y256K/I263H      | 0.7 |
| E6 <sup>a</sup>  | Blue  | D80C                                    | 0.6 |
| E11              | Beige | A180N                                   | 0.6 |
| F9               | Beige | F81R/T87P/F173H/A180W/M212W/I259K/I263H | 0.5 |
| A11              | Blue  | M212W                                   | 0.5 |
| D6               | Blue  | F87L/M177L/L181I                        | 0.5 |
| C12              | Blue  | F87L/Y256K                              | 0.5 |
| A6 <sup>a</sup>  | Blue  | A180F                                   | 0.5 |
| B7               | Blue  | M177H/I259K                             | 0.5 |
| H3               | Beige | L75H/F81Y/F87P/L181P/M212R/R255D/Y256V  | 0.4 |
| D5               | Blue  | D80C/F81Y/F173H/M177H/L181P/I259G       | 0.4 |
| A12              | Blue  | R255P                                   | 0.4 |
| B12              | Blue  | F87L/L181P/I259P                        | 0.4 |
| E9               | Beige | F173C                                   | 0.4 |
| E2               | Beige | L71N                                    | 0.4 |
| E8               | Beige | G83K                                    | 0.4 |

|                 |       |                                     |      |
|-----------------|-------|-------------------------------------|------|
| F12             | Beige | F173E/M177L/L181I/M212R/Y256V/I263S | 0.3  |
| B12             | Blue  | F87L/L181P/I259P                    | 0.3  |
| G7              | Blue  | F87L/M177L/R255G/I263N              | 0.3  |
| B9              | Blue  | F81R/A82F/F87L/L181F                | 0.3  |
| F2              | Beige | I258F                               | 0.3  |
| E9              | Beige | F173C                               | 0.3  |
| H5              | Beige | F81R/A82L/F173H/R255P               | 0.3  |
| C7              | Blue  | D80N/F87S/M212P/R256G               | 0.3  |
| D9              | Blue  | R255G/I259G                         | 0.3  |
| A7 <sup>a</sup> | Blue  | A180M                               | 0.3  |
| B2 <sup>a</sup> | Blue  | I263G                               | 0.3  |
| D2              | Blue  | F81R/F87L/M177L                     | 0.2  |
| F5              | Beige | F87P/F173H/I263Q                    | 0.2  |
| D12             | Blue  | A82E/L181I/R255I                    | 0.2  |
| H6              | Beige | M177L/A184F/M212P/Y256V/I259G       | 0.2  |
| A5 <sup>a</sup> | Blue  | F87P                                | 0.2  |
| C12             | Blue  | F87L/Y256K                          | 0.2  |
| F7              | Beige | F81R/F87G/L181I/I259P               | 0.2  |
| B6              | Blue  | I259P                               | 0.2  |
| F5              | Beige | F87P/F173H/I263Q                    | 0.1  |
| E4              | Beige | L75P                                | 0.1  |
| E7              | Beige | G83F                                | 0.1  |
| D11             | Blue  | A180F/L181F                         | 0.1  |
| F4              | Beige | H266K                               | 0.1  |
| G3              | Beige | L75R/I259G                          | 0.1  |
| E5              | Beige | D80L                                | 0.1  |
| E3              | Beige | L71Q                                | 0.1  |
| E5              | Beige | D80L                                | 0.1  |
| H2              | Beige | F173E/M177H/M212R/I263S             | 0.1  |
| C3              | Blue  | F87L/M177L/A184K/Y256V              | 0.1  |
| G6              | Beige | D80P/F81L/I263N                     | 0.1  |
| F1              | Beige | Y256M                               | 0.1  |
| D4              | Blue  | F173P/R255D                         | 0.1  |
| G8              | Blue  | P172H/Y256K/I263G                   | 0.1  |
| D7              | Blue  | F87S/I259P                          | 0.1  |
| E12             | Beige | L181N                               | 0.03 |
| G4              | Beige | D80C/F173P/A180F/M212K/R255P        | 0.03 |
| G7 <sup>a</sup> | Blue  | F87L/M177L/R255G/I263N              | 0.03 |
| F11             | Beige | D80P/F87L/F173E/A184E/I259G/I263H   | 0.03 |
| G5              | Blue  | F81Y/A82S/M212R/I263G               | 0.03 |
| E2 <sup>a</sup> | Beige | L71N                                | 0.02 |
| D3              | Blue  | F87L/A180E/A184F/Y256K/I259K        | 0.02 |
| E11             | Beige | A180N                               | 0.02 |

<sup>a</sup>Variants used for assays with NADPH recycling.

**Supplementary Table 10.** Relationship between 4-AAP absorbance assays and reactions conversion with NADPH recycling.

| Variant Name | Variant Identity       | Phenotype | 4-AAP Assay Absorbance (485 nm) <sup>a</sup> | % Conversion (Product Formation) <sup>b</sup> |
|--------------|------------------------|-----------|----------------------------------------------|-----------------------------------------------|
| A10          | M212K                  | Blue      | 0.275                                        | 98                                            |
| E2           | L71N                   | Beige     | 0.597                                        | 93                                            |
| E6           | D80C                   | Blue      | 0.063                                        | 91                                            |
| A6           | A180F                  | Blue      | 0.000                                        | 70                                            |
| B2           | I263G                  | Blue      | 0.364                                        | 68                                            |
| C1           | F87P/A180M/I263G       | Blue      | 0.928                                        | 67                                            |
| A9           | A184K                  | Blue      | 0.818                                        | 66                                            |
| A7           | A180M                  | Blue      | 0.225                                        | 61                                            |
| A5           | F87P                   | Blue      | 0.895                                        | 12                                            |
| His-A82Q     | His-A82Q               | Blue      | 0.173                                        | 8                                             |
| G7           | F87L/M177L/R255G/I263N | Blue      | 0.186                                        | 5                                             |

<sup>a</sup>Assays performed using 409  $\mu$ M NADPH with a 1-hour reaction time. <sup>b</sup>Assays performed using an NADPH recycling system with a 3-hour reaction time. All measurements were performed in at least duplicate.

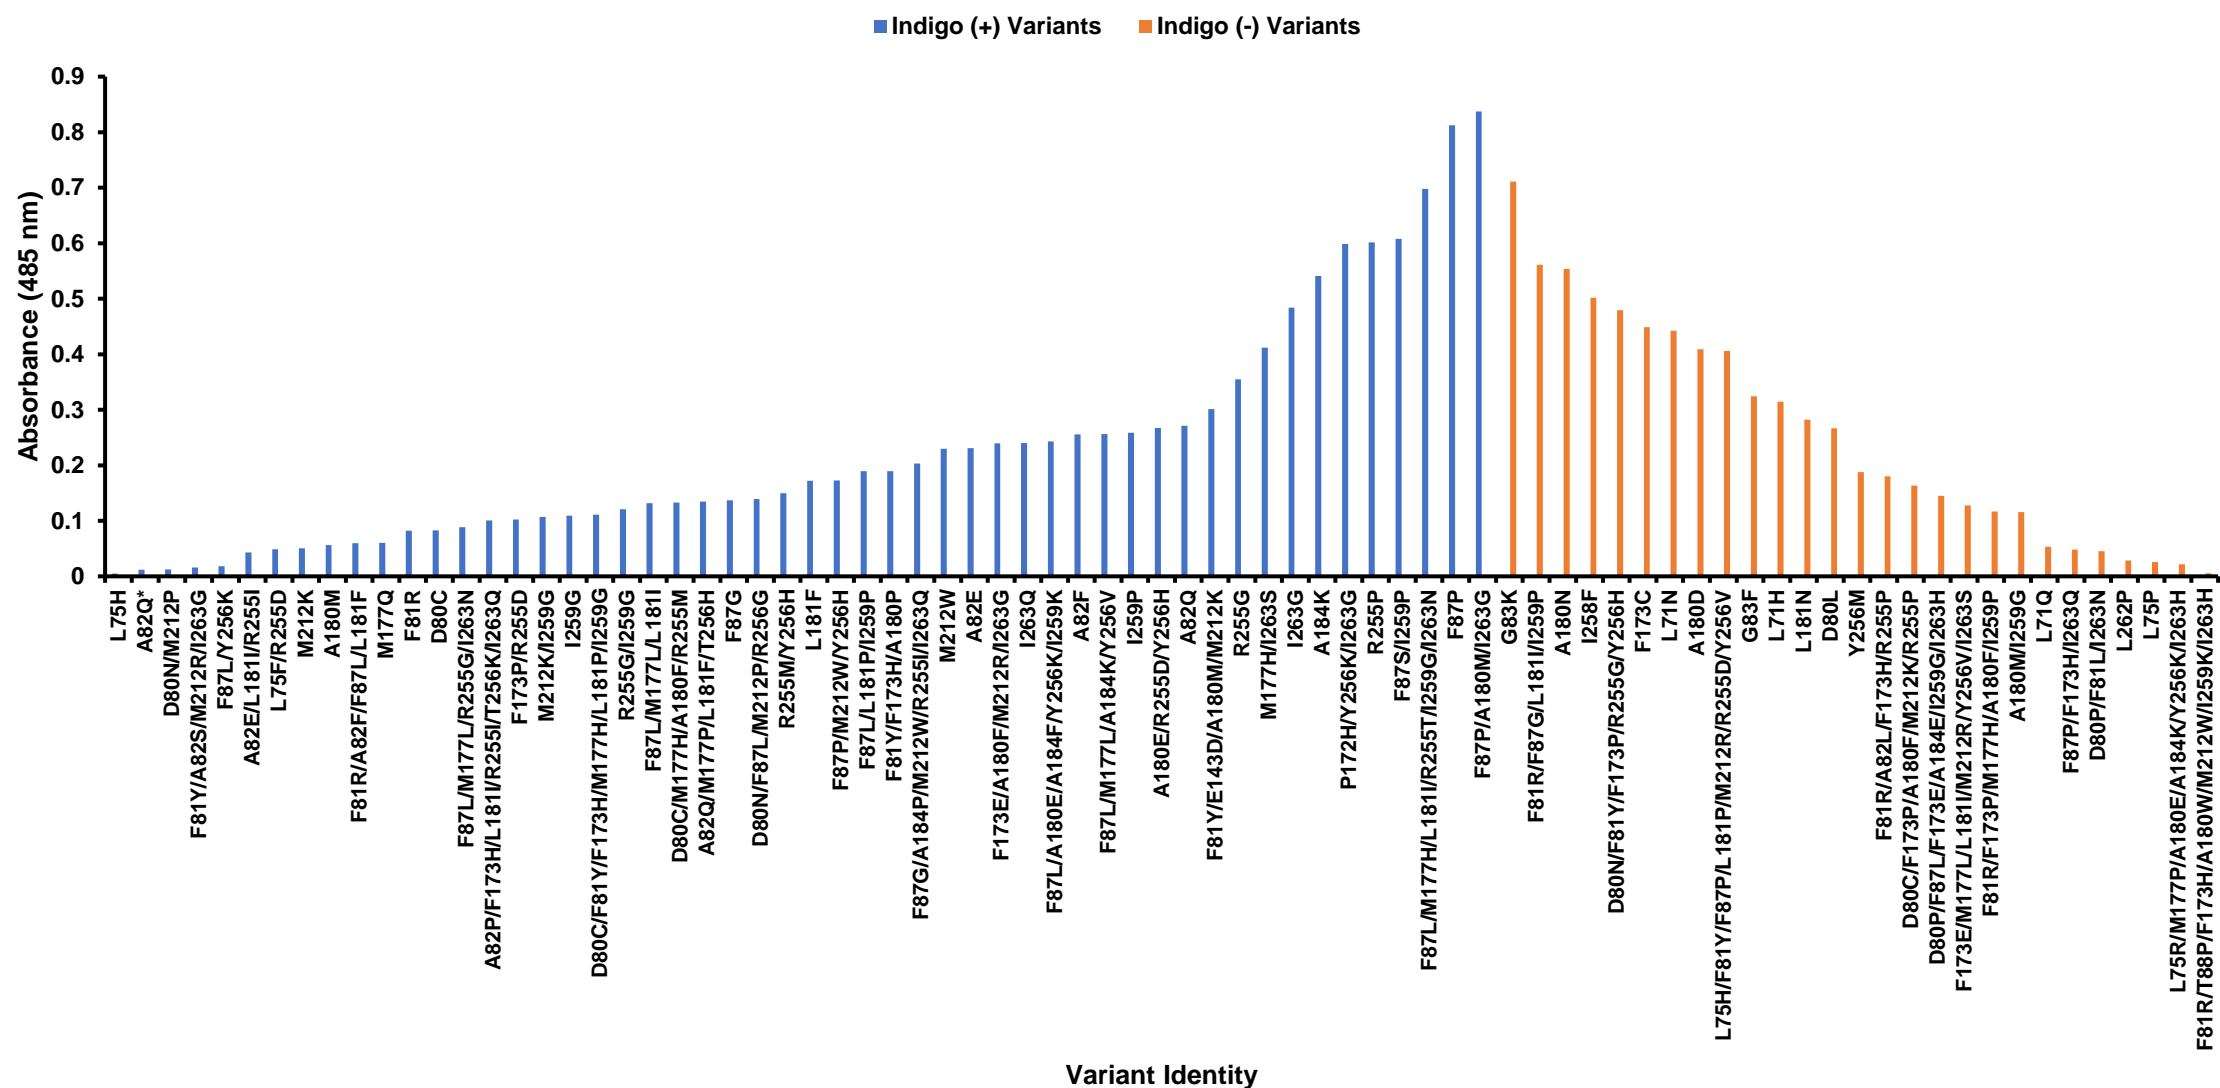

**Supplementary Figure 1.** Activity of indigo (+) (blue) and indigo (-) (orange) P450 BM3 variants towards hydroxylation of **2**. The conjugation of phenolic products to 4-aminoantipyrene was measured at 485 nm. For clarity, only the variants showing activity are represented. No wild-type P450 BM3 activity was observed with this substrate. Note: A82Q\*= C-terminal His-tag. All experiments were performed in at least duplicate.

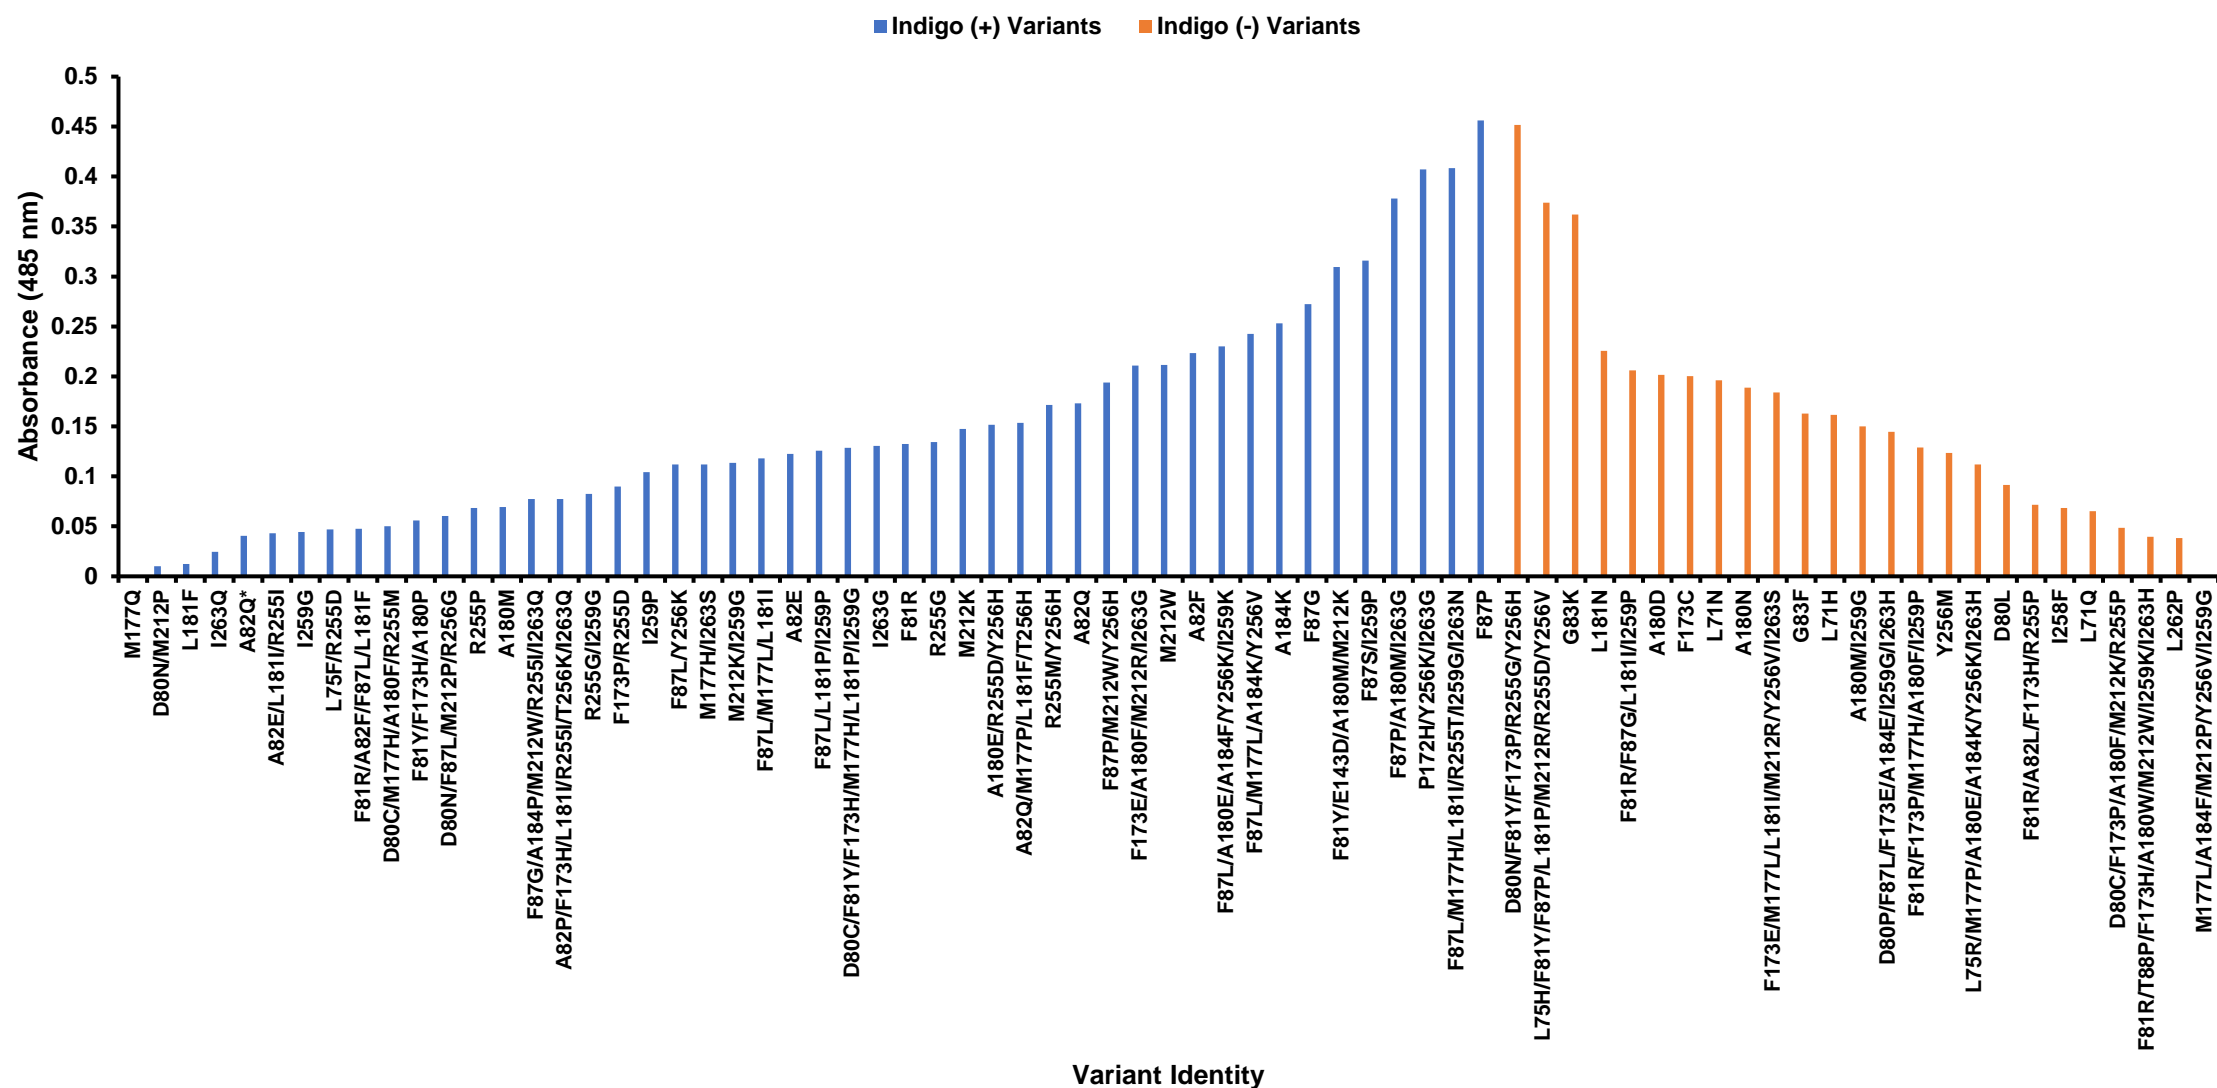

**Supplementary Figure 2.** Activity of indigo (+) (blue) and indigo (-) (orange) P450 BM3 variants towards hydroxylation of **3**. The conjugation of phenolic products to 4-aminoantipyrene was measured at 485 nm. For clarity, only the variants showing activity are represented. No wild-type P450 BM3 activity was observed with this substrate. Note: A82Q\*= C-terminal His-tag. All experiments were performed in at least duplicate.

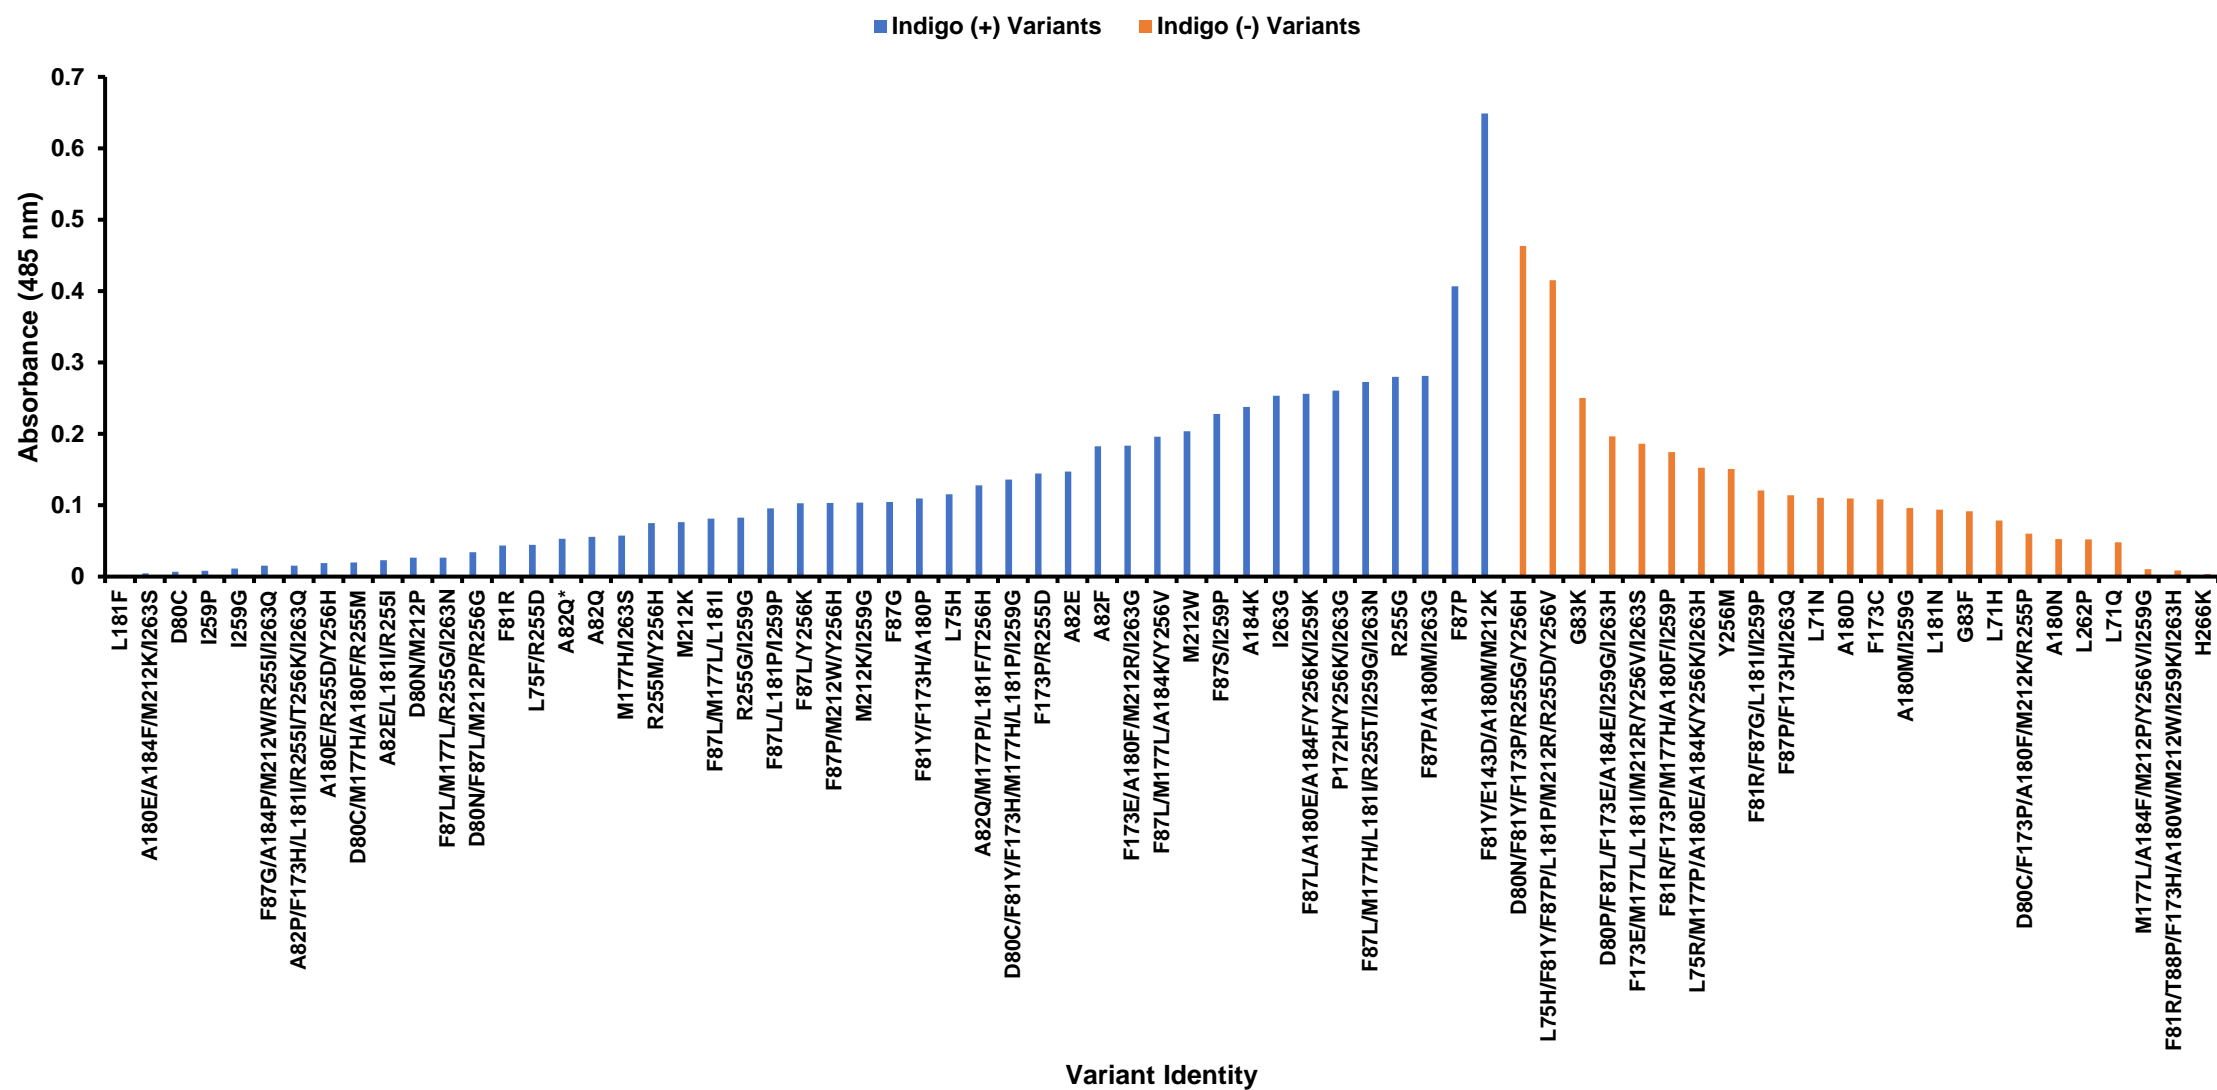

**Supplementary Figure 3.** Activity of indigo (+) (blue) and indigo (-) (orange) P450 BM3 variants towards hydroxylation of **4**. The conjugation of phenolic products to 4-aminoantipyrene was measured at 485 nm. For clarity, only the variants showing activity are represented. No wild-type P450 BM3 activity was observed with this substrate. Note: A82Q\*= C-terminal His-tag. All experiments were performed in at least duplicate.



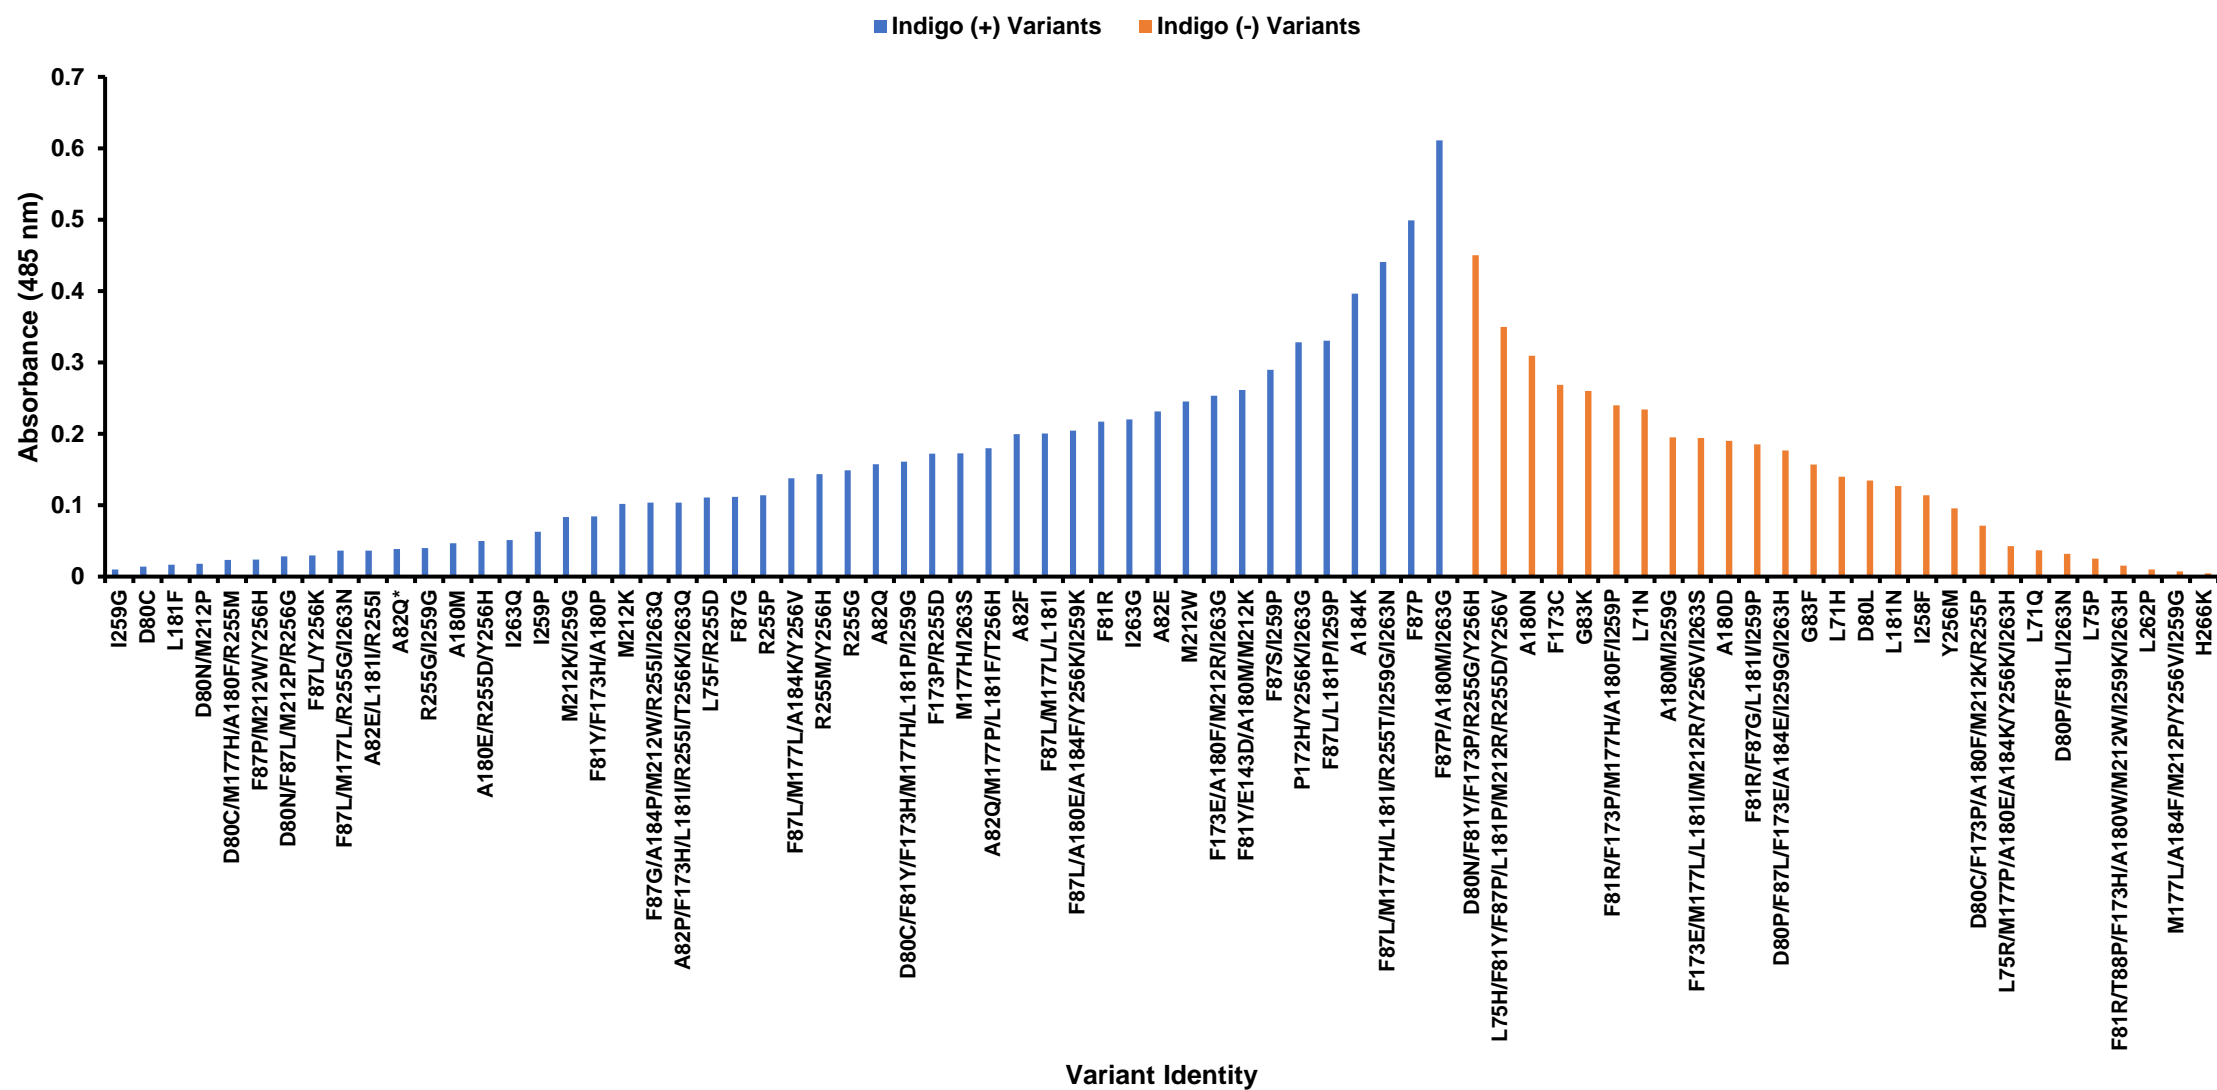

**Supplementary Figure 4.** Activity of indigo (+) (blue) and indigo (-) (orange) P450 BM3 variants towards hydroxylation of **5**. The conjugation of phenolic products to 4-aminoantipyrene was measured at 485 nm. For clarity, only the variants showing activity are represented. No wild-type P450 BM3 activity was observed with this substrate. Note: A82Q\*= C-terminal His-tag. All experiments were performed in at least duplicate.

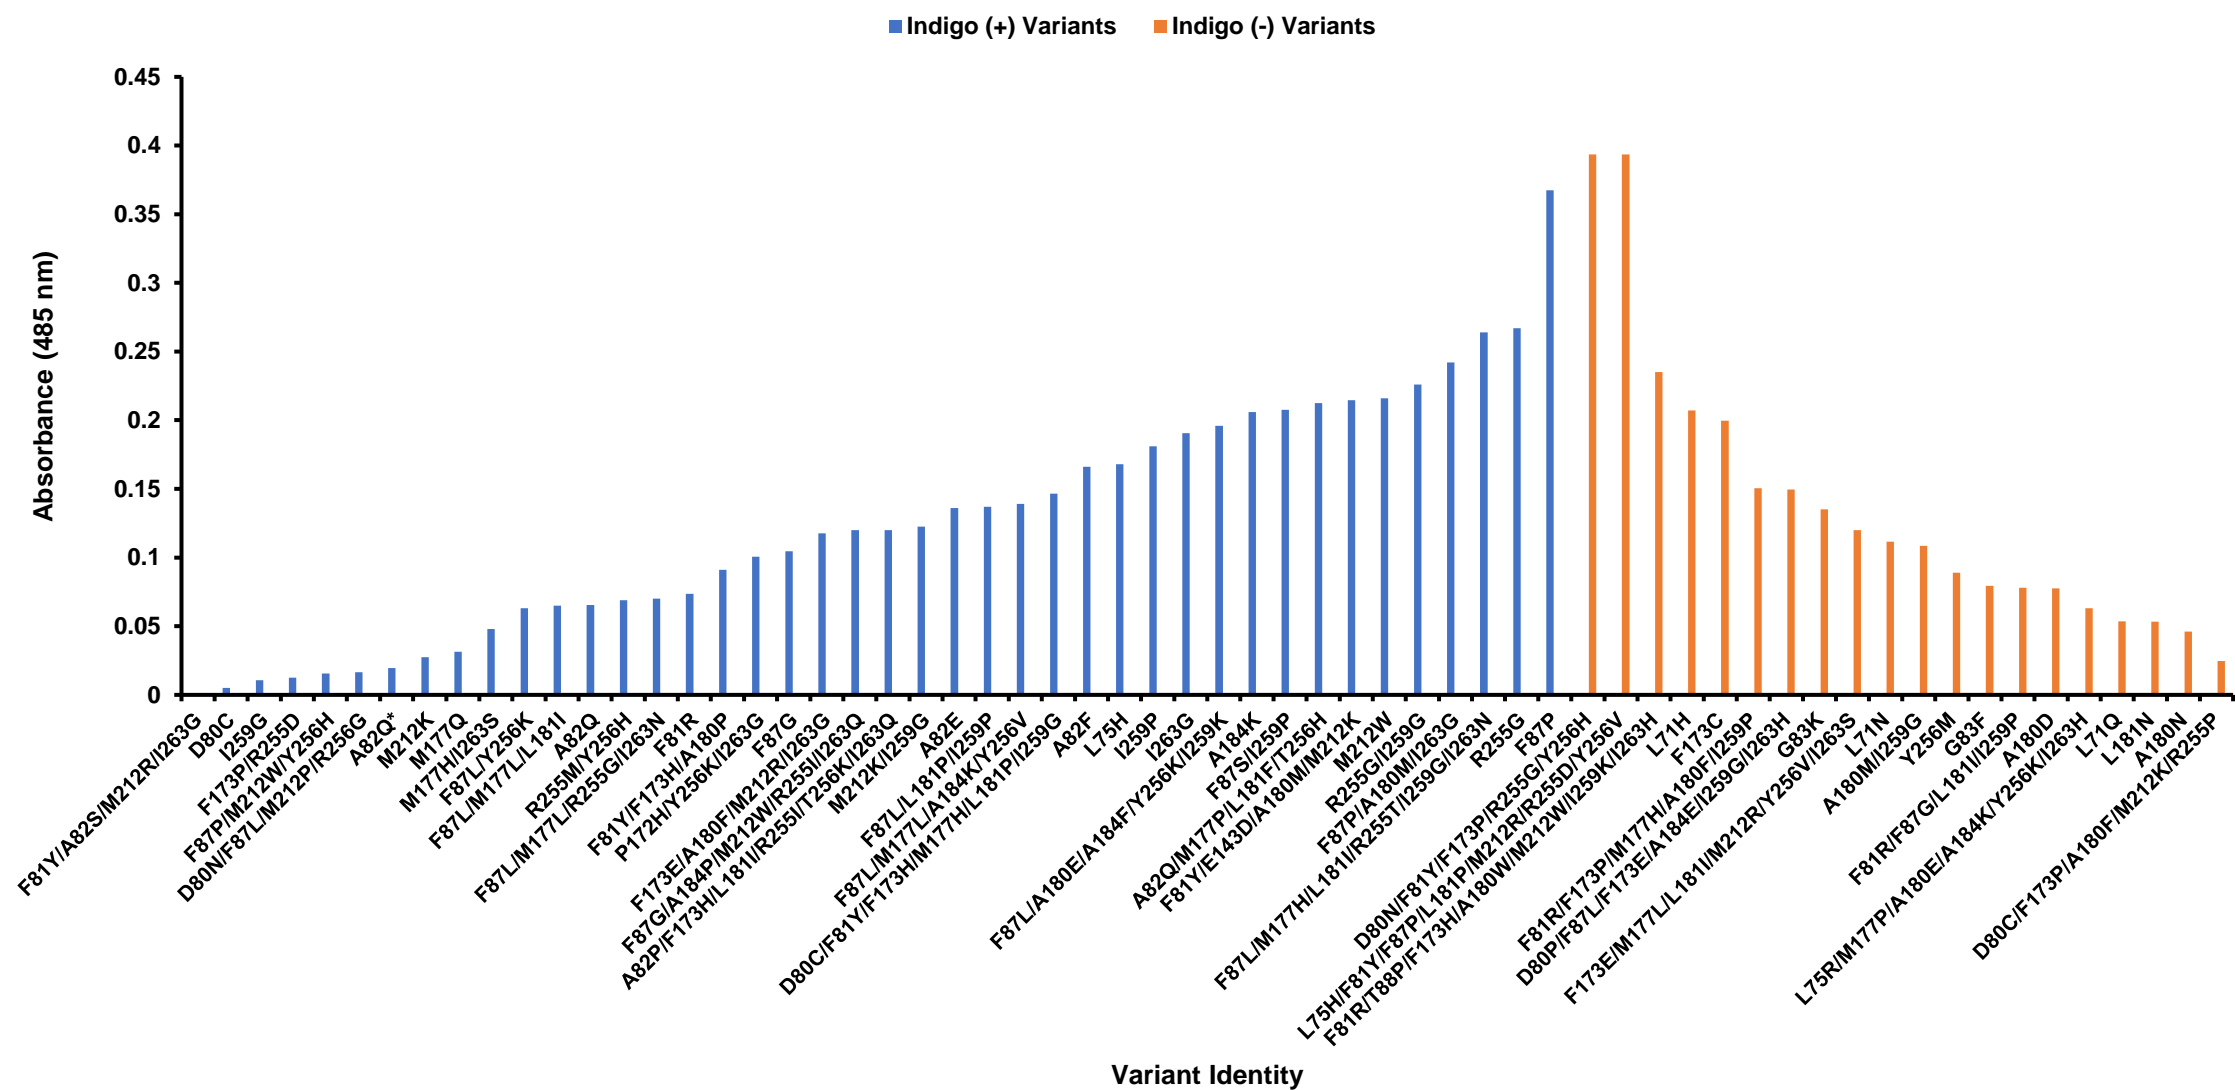

**Supplementary Figure 5.** Activity of indigo (+) (blue) and indigo (-) (orange) P450 BM3 variants towards hydroxylation of **6**. The conjugation of phenolic products to 4-aminoantipyrene was measured at 485 nm. For clarity, only the variants showing activity are represented. No wild-type P450 BM3 activity was observed with this substrate. Note: A82Q\* = C-terminal His-tag. All experiments were performed in at least duplicate.

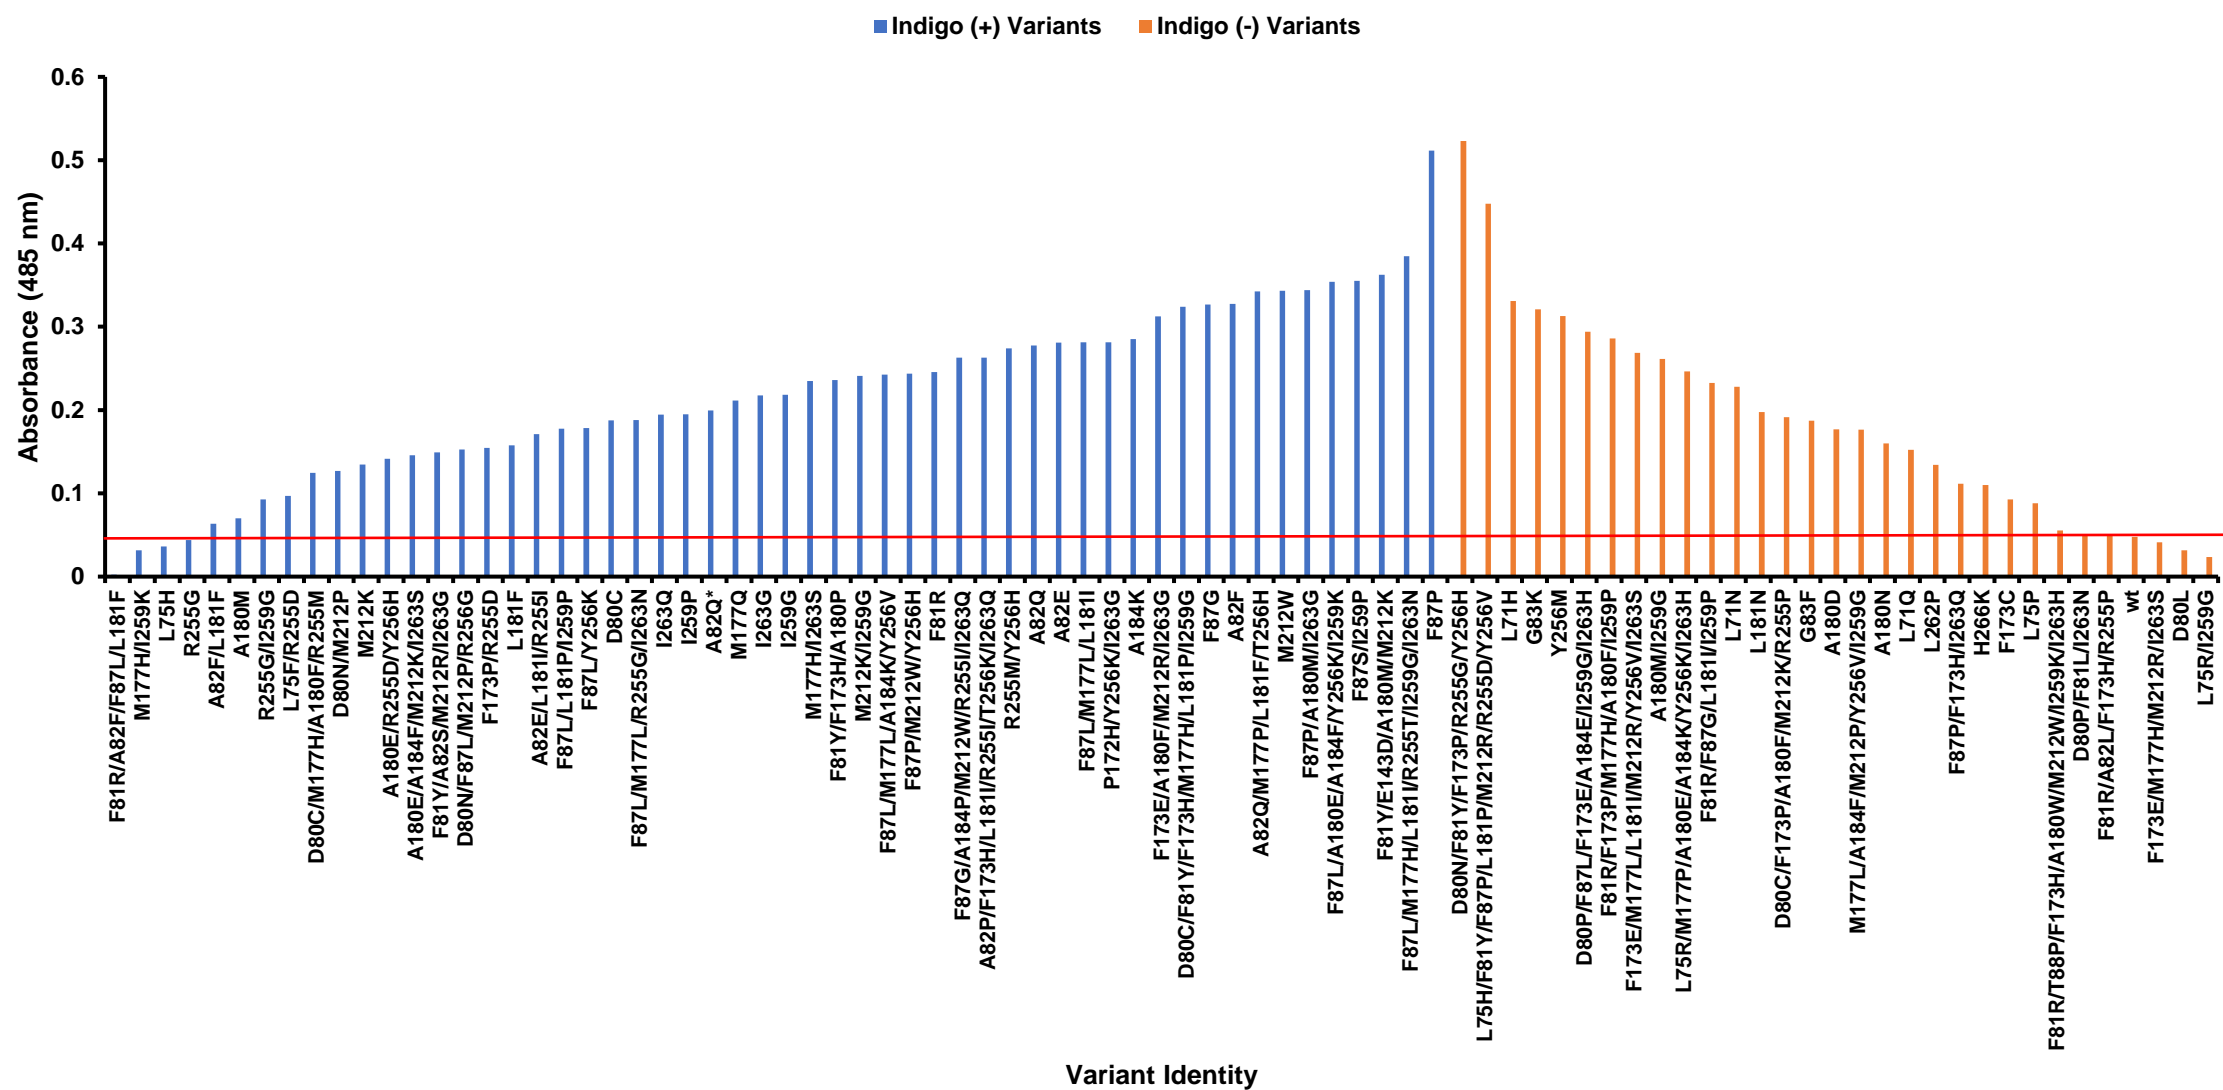

**Supplementary Figure 6.** Activity of indigo (+) (blue) and indigo (-) (orange) P450 BM3 variants towards hydroxylation of **7**. The conjugation of phenolic products to 4-aminoantipyrene was measured at 485 nm. For clarity, only the variants showing activity are represented. Activity of wild-type P450 BM3 is displayed with a red line. Note: A82Q\* = C-terminal His-tag. All experiments were performed in at least duplicate.

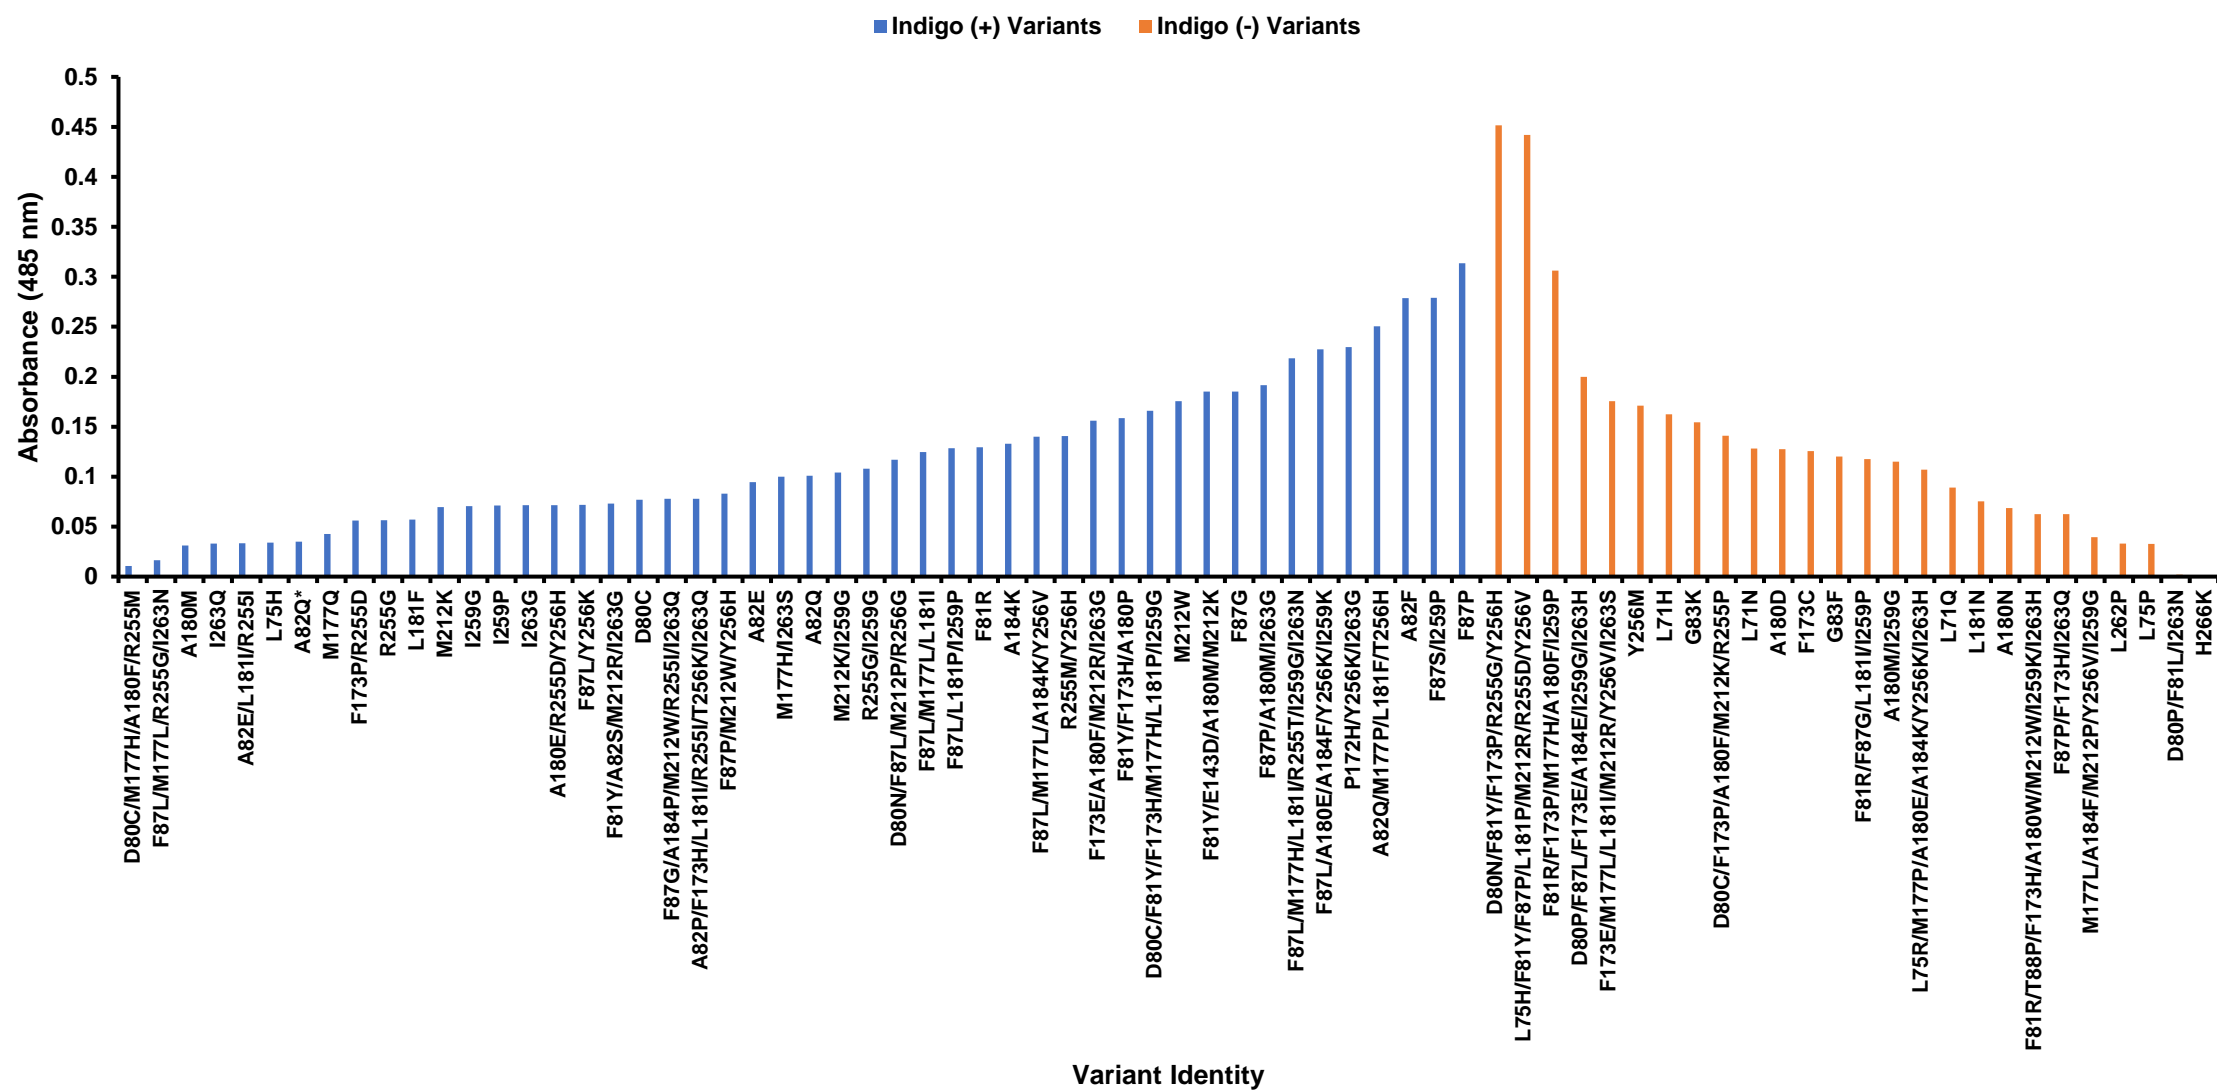

**Supplementary Figure 7.** Activity of indigo (+) (blue) and indigo (-) (orange) P450 BM3 variants towards hydroxylation of **8**. The conjugation of phenolic products to 4-aminoantipyrene was measured at 485 nm. For clarity, only the variants showing activity are represented. No wild-type P450 BM3 activity was observed with this substrate. Note: A82Q\*= C-terminal His-tag. All experiments were performed in at least duplicate.

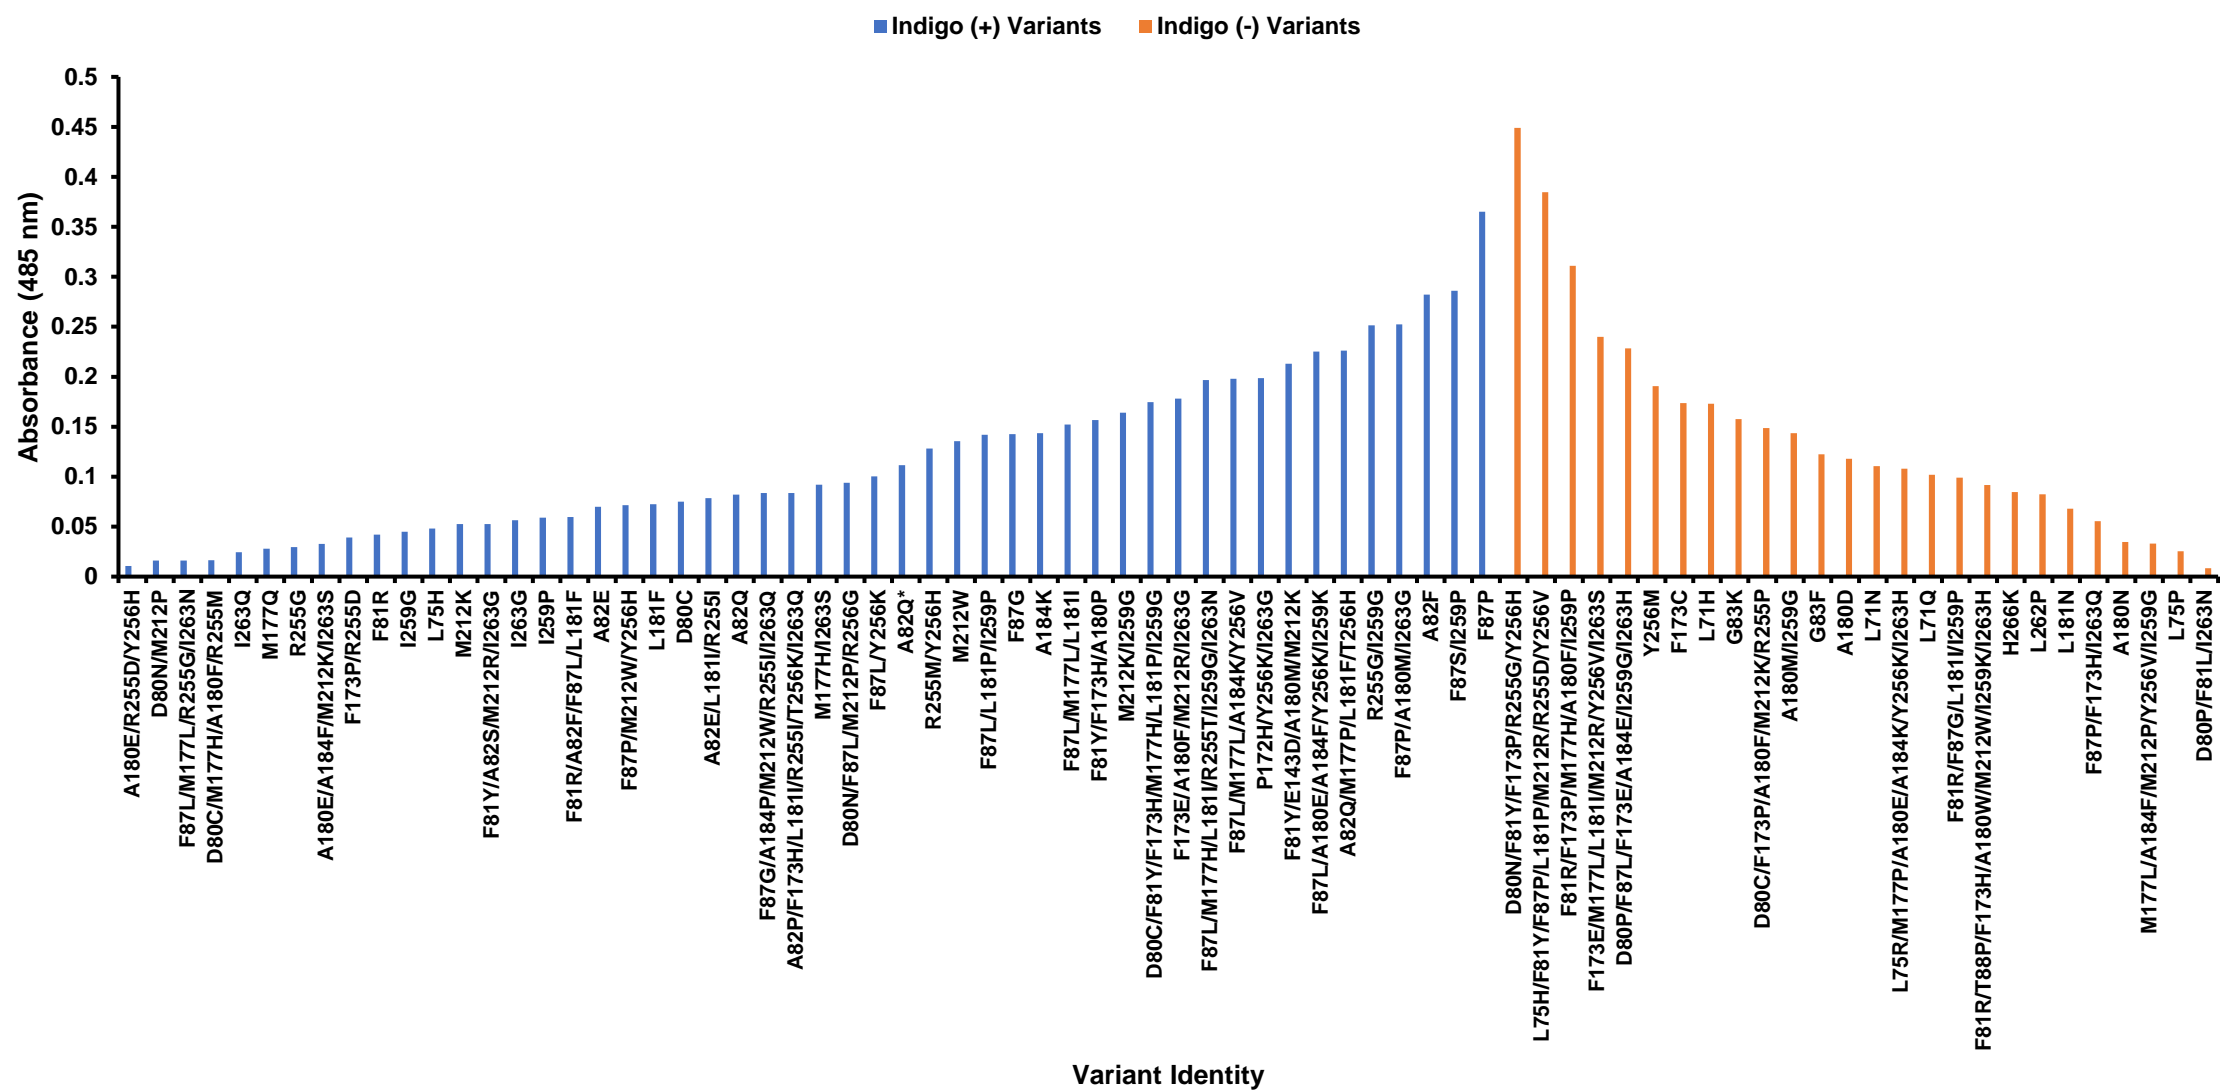

**Supplementary Figure 8.** Activity of indigo (+) (blue) and indigo (-) (orange) P450 BM3 variants towards hydroxylation of **9**. The conjugation of phenolic products to 4-aminoantipyrene was measured at 485 nm. For clarity, only the variants showing activity are represented. No wild-type P450 BM3 activity was observed with this substrate. Note: A82Q\* = C-terminal His-tag. All experiments were performed in at least duplicate.

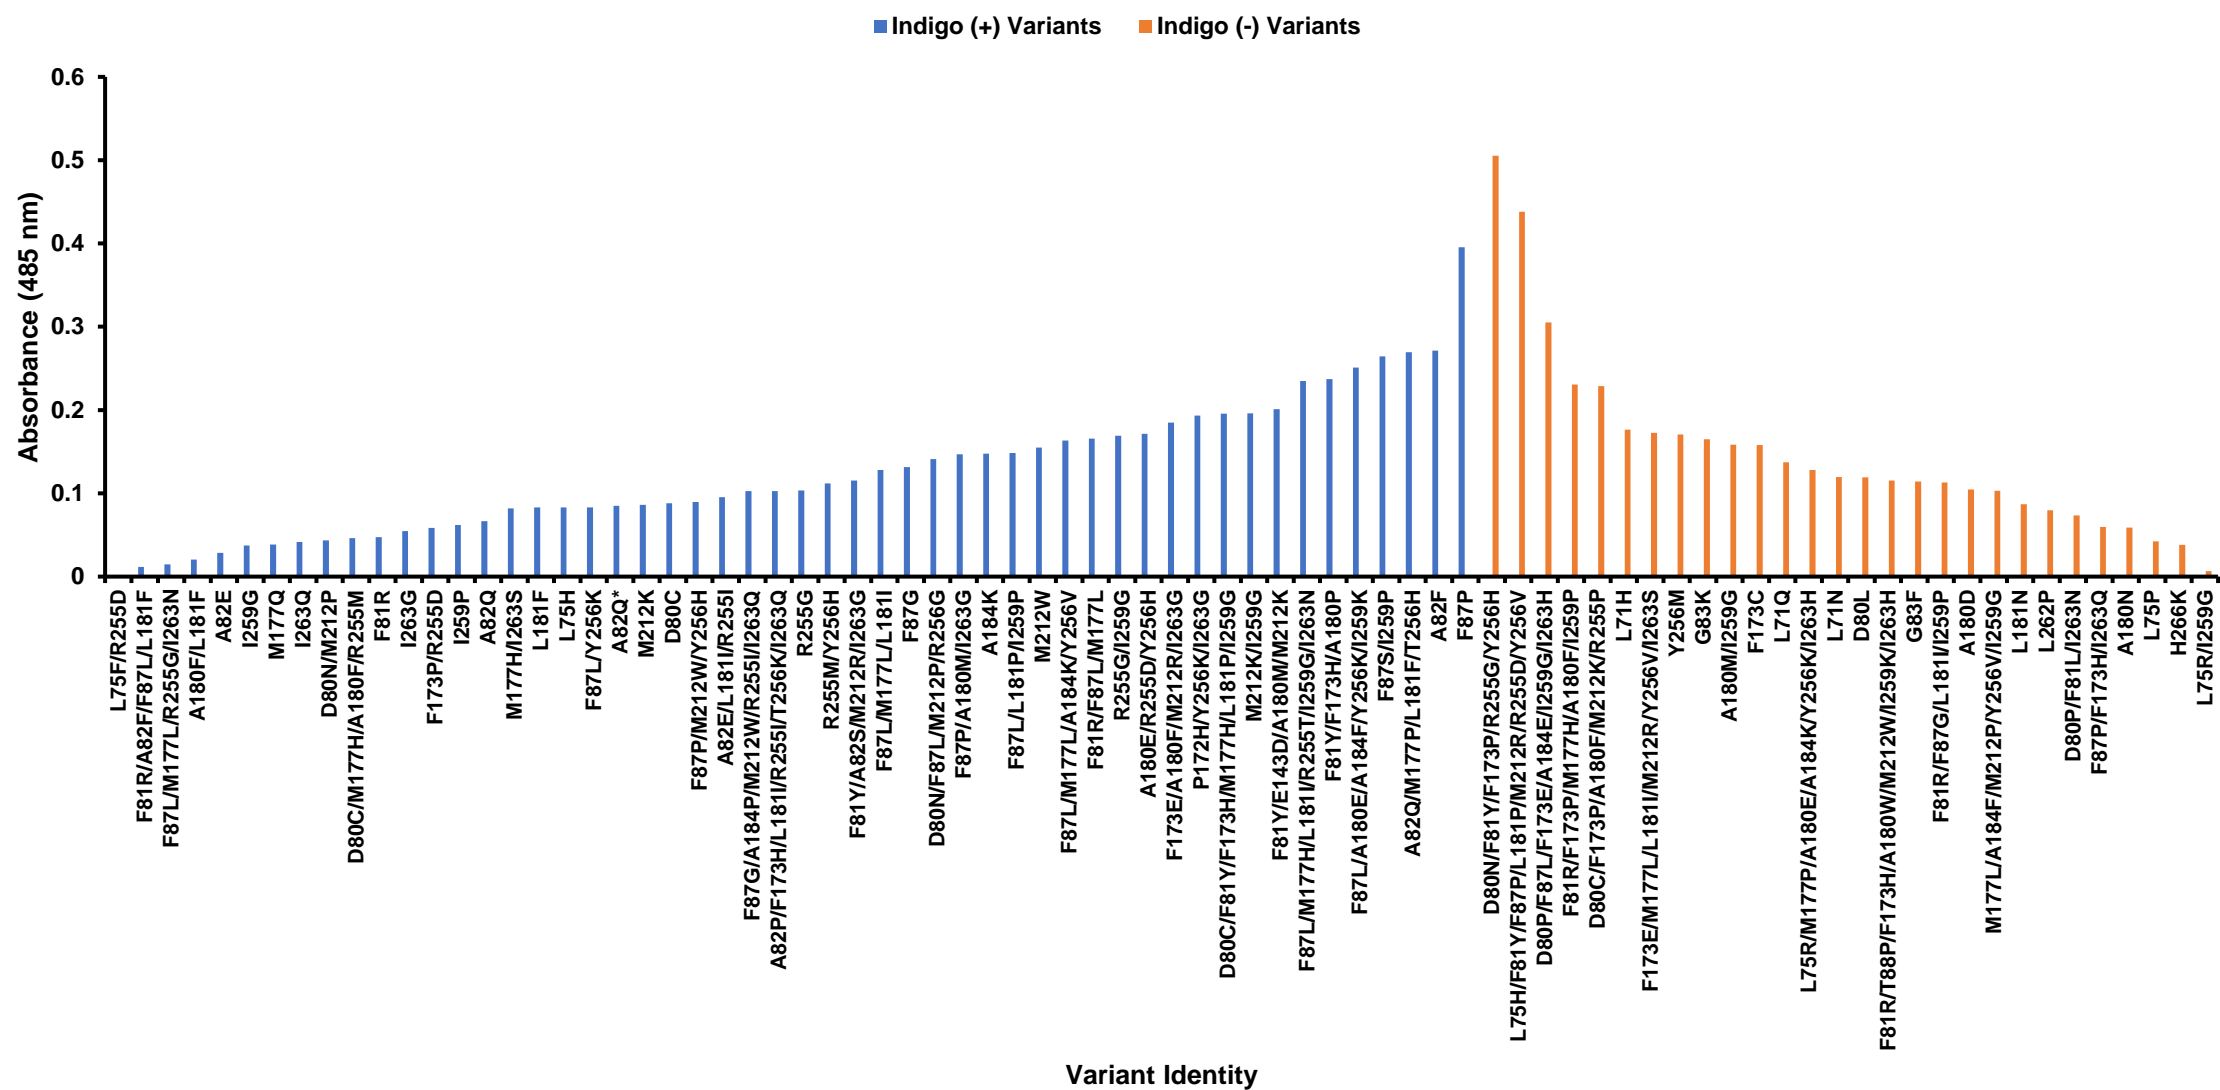

**Supplementary Figure 9.** Activity of indigo (+) (blue) and indigo (-) (orange) P450 BM3 variants towards hydroxylation of **10**. The conjugation of phenolic products to 4-aminoantipyrene was measured at 485 nm. For clarity, only the variants showing activity are represented. No wild-type P450 BM3 activity was observed with this substrate. Note: A82Q\*= C-terminal His-tag. All experiments were performed in at least duplicate.

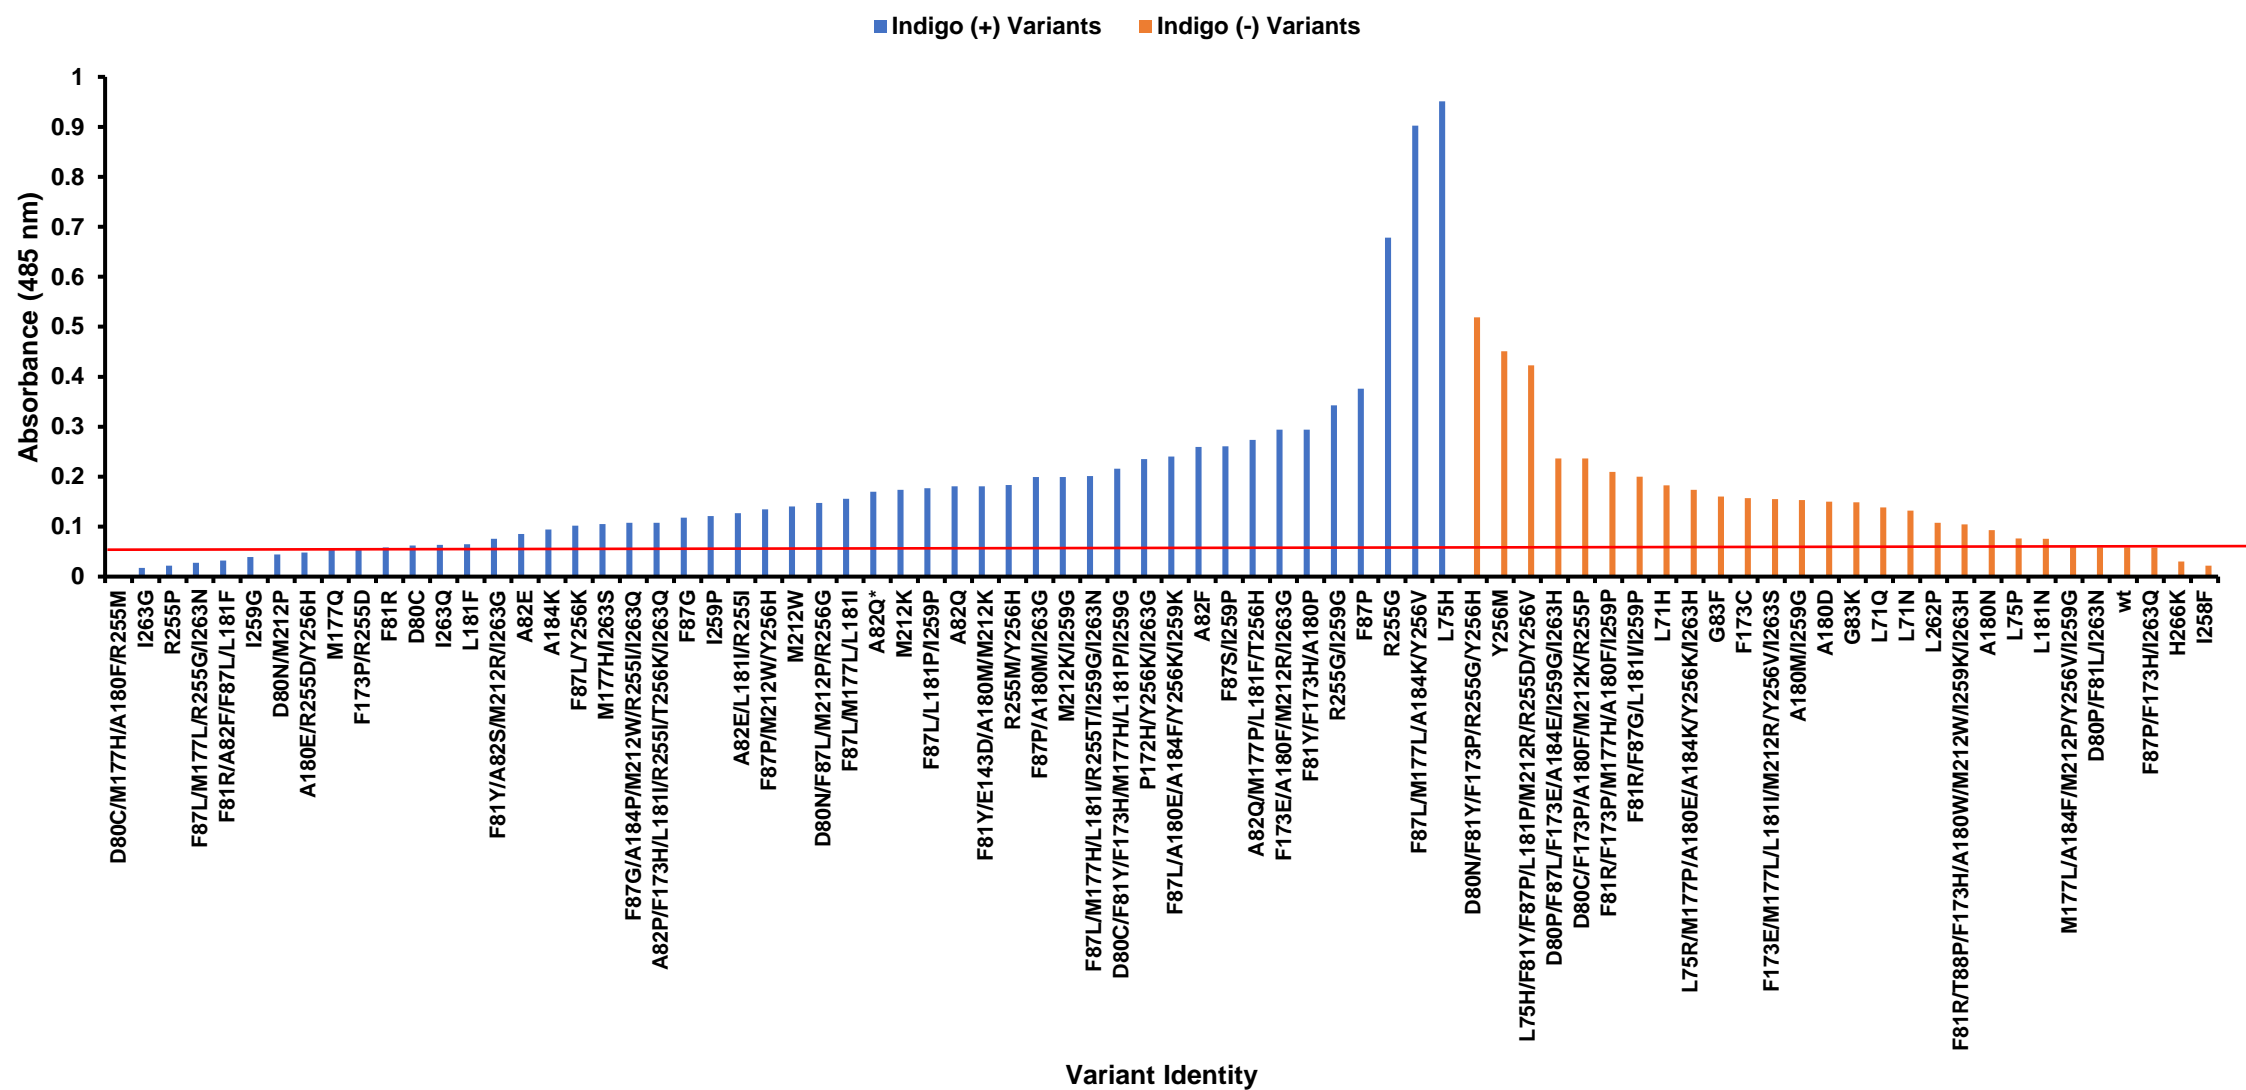

**Supplementary Figure 10.** Activity of indigo (+) (blue) and indigo (-) (orange) P450 BM3 variants towards hydroxylation of **11**. The conjugation of phenolic products to 4-aminoantipyrene was measured at 485 nm. For clarity, only the variants showing activity are represented. Activity of wild-type P450 BM3 is displayed with a red line. Note: A82Q\* = C-terminal His-tag. All experiments were performed in at least duplicate.

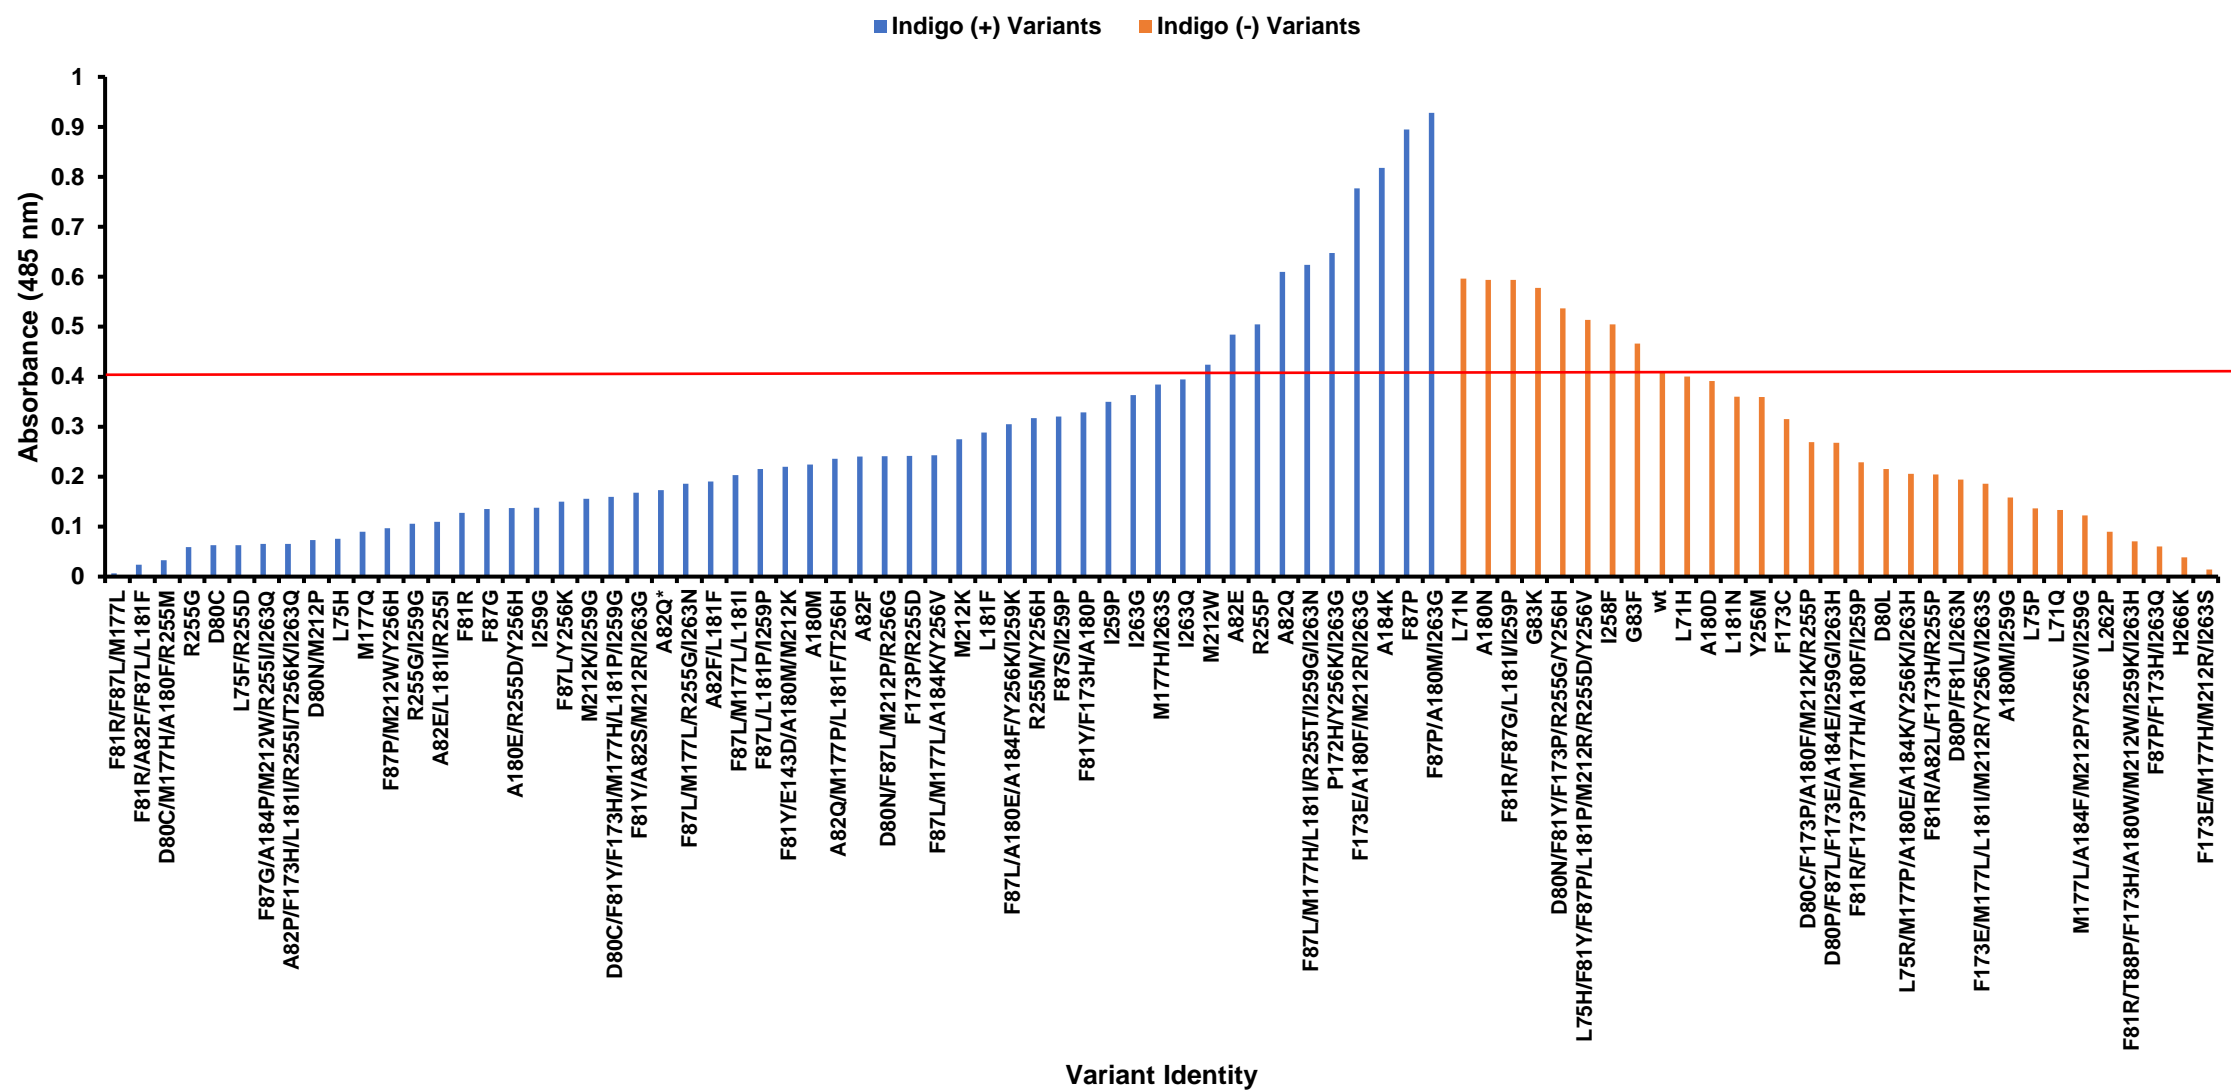

**Supplementary Figure 11.** Activity of indigo (+) (blue) and indigo (-) (orange) P450 BM3 variants towards hydroxylation of **12**. The conjugation of phenolic products to 4-aminoantipyrene was measured at 485 nm. For clarity, only the variants showing activity are represented. Activity of wild-type P450 BM3 is displayed with a red line. Note: A82Q\* = C-terminal His-tag. All experiments were performed in at least duplicate.



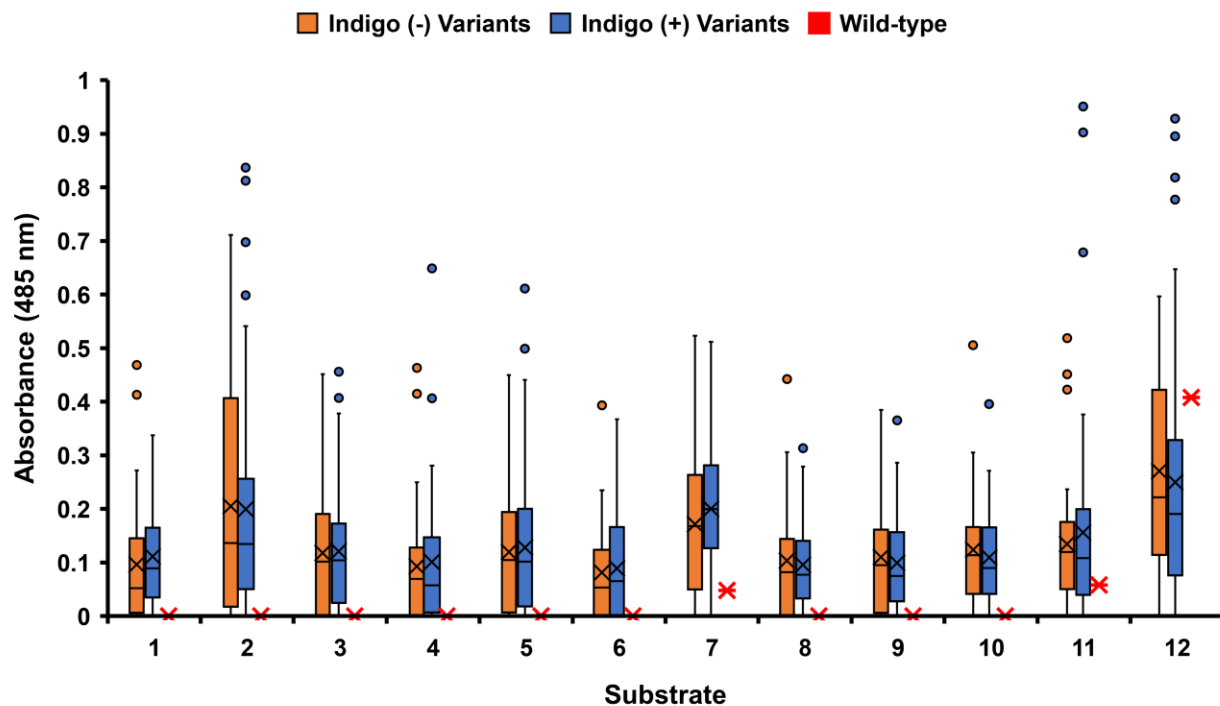

**Supplementary Figure 12.** Box plot comparing product formation measured at 485 nm, after 4-AAP conjugation, using indigo (+) variants (blue) and indigo (-) variants (orange). Mean absorbance values for each are displayed with an “X”. Balls colored according to either category represent “top” variants as determined by the 4-AAP assay. All experiments were performed at least in duplicate. Wild-type activity is represented with a star (red).

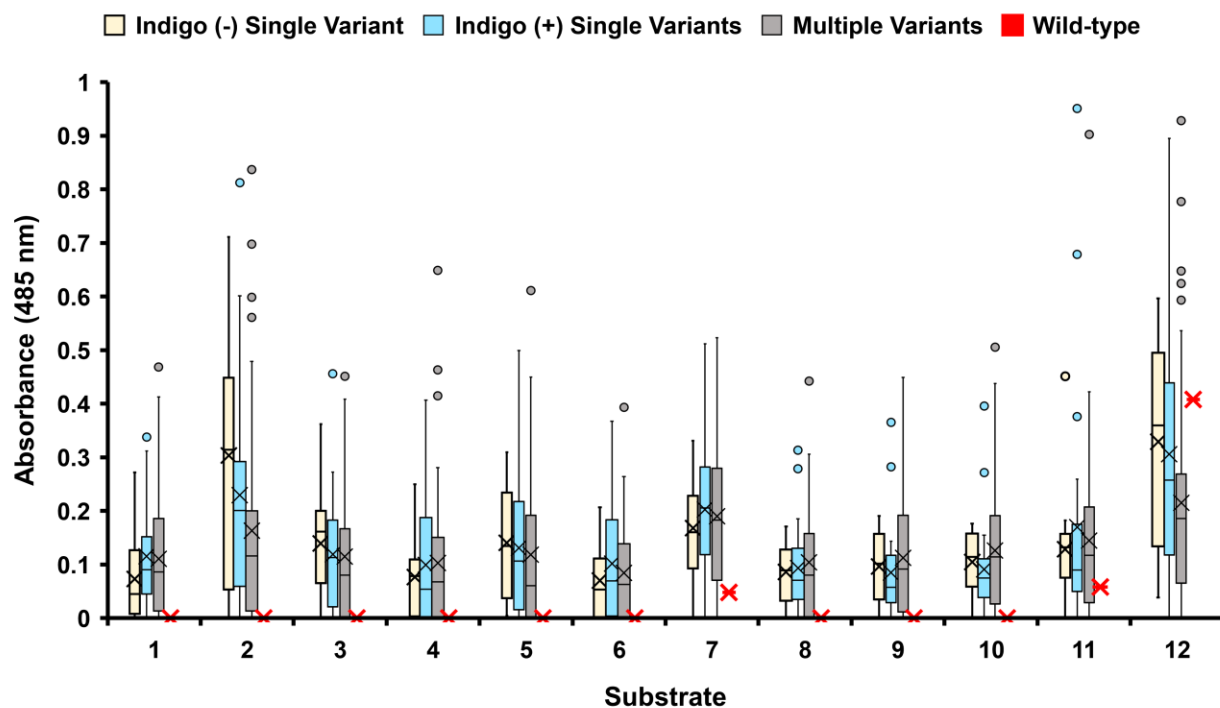

**Supplementary Figure 13.** Aromatic hydroxylation activity of indigo (+) and indigo (-) P450 BM3 variants as reported with the 4-AAP assay. Activity of P450 BM3 variants towards substituted benzenes (substrates 1-12) is given as absorbance at 485 nm. Average absorbance values for each are displayed with an “X” . Balls colored according to either category represent “top” variants as determined by the 4-AAP assay. All experiments were performed at least in duplicate. Wild-type activity is represented with a star (red).

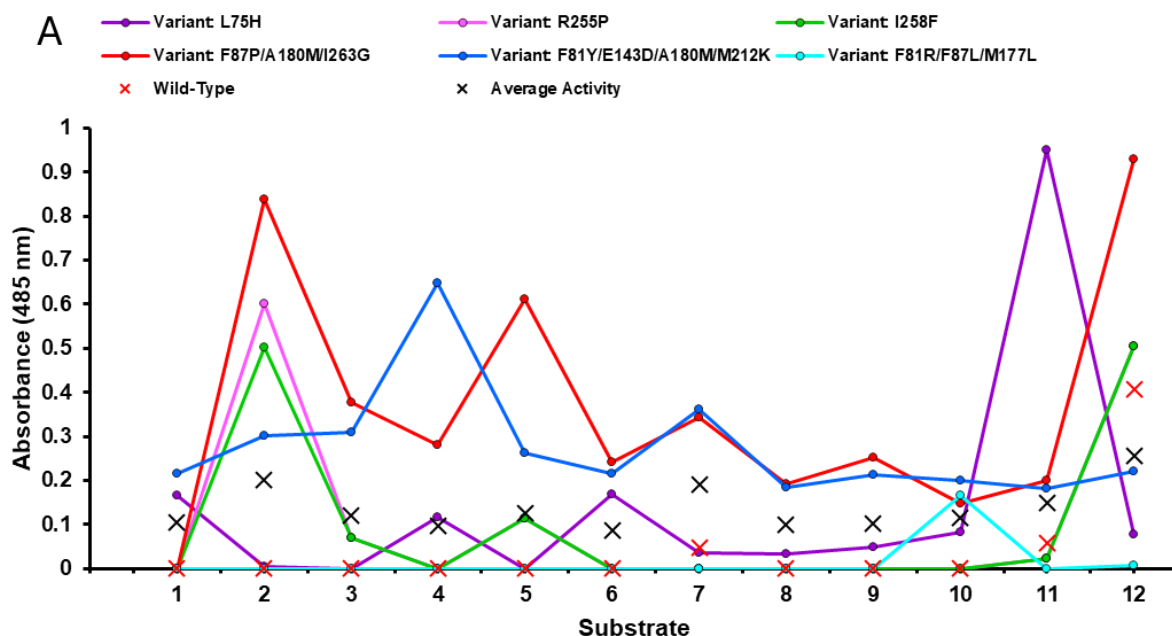

**B**

|                        | Substrate |    |    |    |    |    |    |    |    |    |    |    |
|------------------------|-----------|----|----|----|----|----|----|----|----|----|----|----|
|                        | 1         | 2  | 3  | 4  | 5  | 6  | 7  | 8  | 9  | 10 | 11 | 12 |
| L75H                   | 22        | 79 | 74 | 28 | 76 | 19 | 81 | 65 | 61 | 55 | 1  | 72 |
| R255P                  | 75        | 6  | 55 | 72 | 41 | 63 | 86 | 75 | 77 | 81 | 75 | 14 |
| I285F                  | 75        | 11 | 56 | 72 | 42 | 63 | 86 | 75 | 77 | 81 | 76 | 15 |
| F87P/A180M/I263G       | 75        | 1  | 5  | 5  | 1  | 6  | 8  | 12 | 7  | 31 | 23 | 1  |
| F81Y/E143D/A180M/M212K | 15        | 22 | 9  | 1  | 12 | 10 | 5  | 13 | 13 | 13 | 27 | 44 |
| F81R/F87L/M177L        | 75        | 80 | 74 | 72 | 76 | 63 | 86 | 75 | 77 | 23 | 79 | 85 |

**Supplementary Figure 14.** Aromatic hydroxylation activity and ranked-based analysis of substrate selective P450 BM3 variants. **(A)** Aromatic hydroxylation activity of representative P450 BM3 variants that are selective for certain substrates. Mean absorbance values for each substrate are displayed with a black "X". Wild-type activity is represented with a red "X". Variants L75H, R255P, I285F, F87P/A180M/I263G, F81Y/E143D/A180M/M212K, and F81R/F87L/M177L all display a preference for certain substrates and are represented with purple, pink, green, red, dark blue and light blue lines, respectively. **(B)** Ranked based analysis of variants with enhanced substrate selectivity. The values in each row represent the activity rank for each variant with the respective substrates. Outliers, which represent a higher rank (lower number) are represented as shaded green boxes. These boxes demonstrate which substrate each variant is more selective for. Note: when comparing ranks for each substrate (column under each substrate) there may be number duplication, and this represents a ranking tie between two variants.

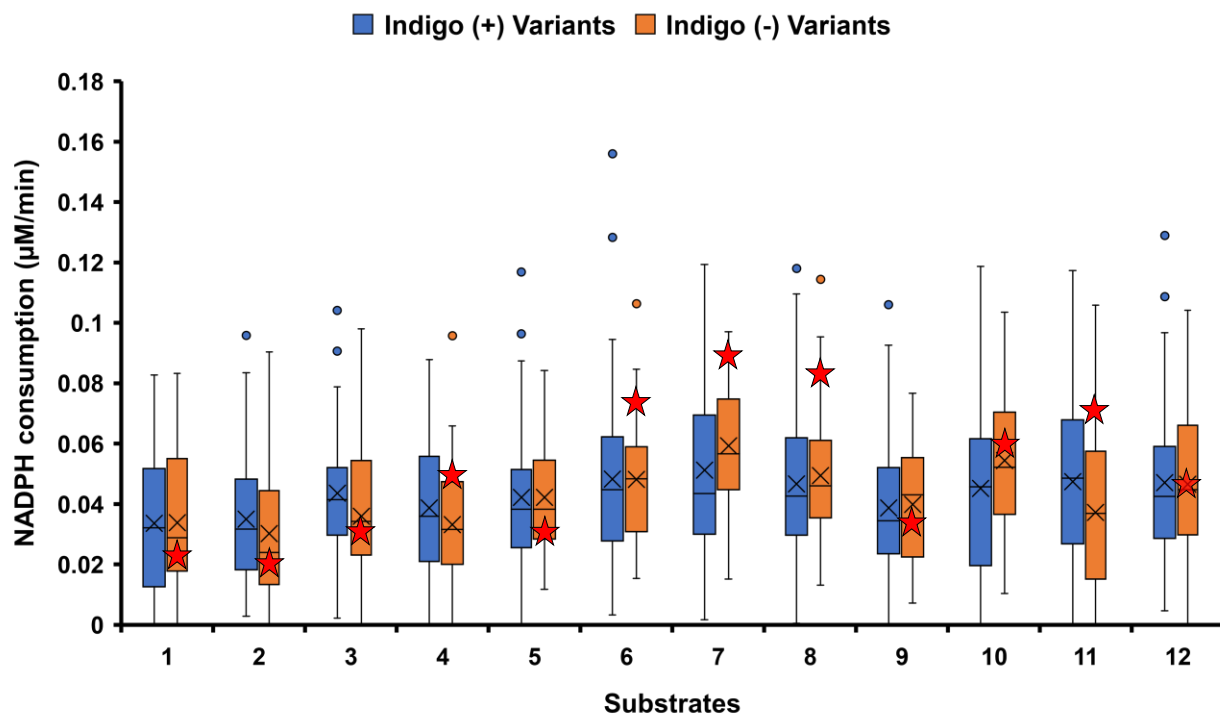

**Supplementary Figure 15.** NADPH consumption of indigo (+) (blue) and indigo (-) (orange) P450 BM3 variants measured during activity assay. NADPH consumption rates of P450 BM3 variants towards substituted benzenes (substrates 1-12) is given as rate ( $\mu\text{M}/\text{min}$ ) calculated from absorbance at 340 nm over 87 seconds. Average absorbance values for each are displayed with an "X". Balls colored according to either category represent "top" variants. All experiments were performed at least in duplicate. Wild-type consumption rate is represented with a star (red).

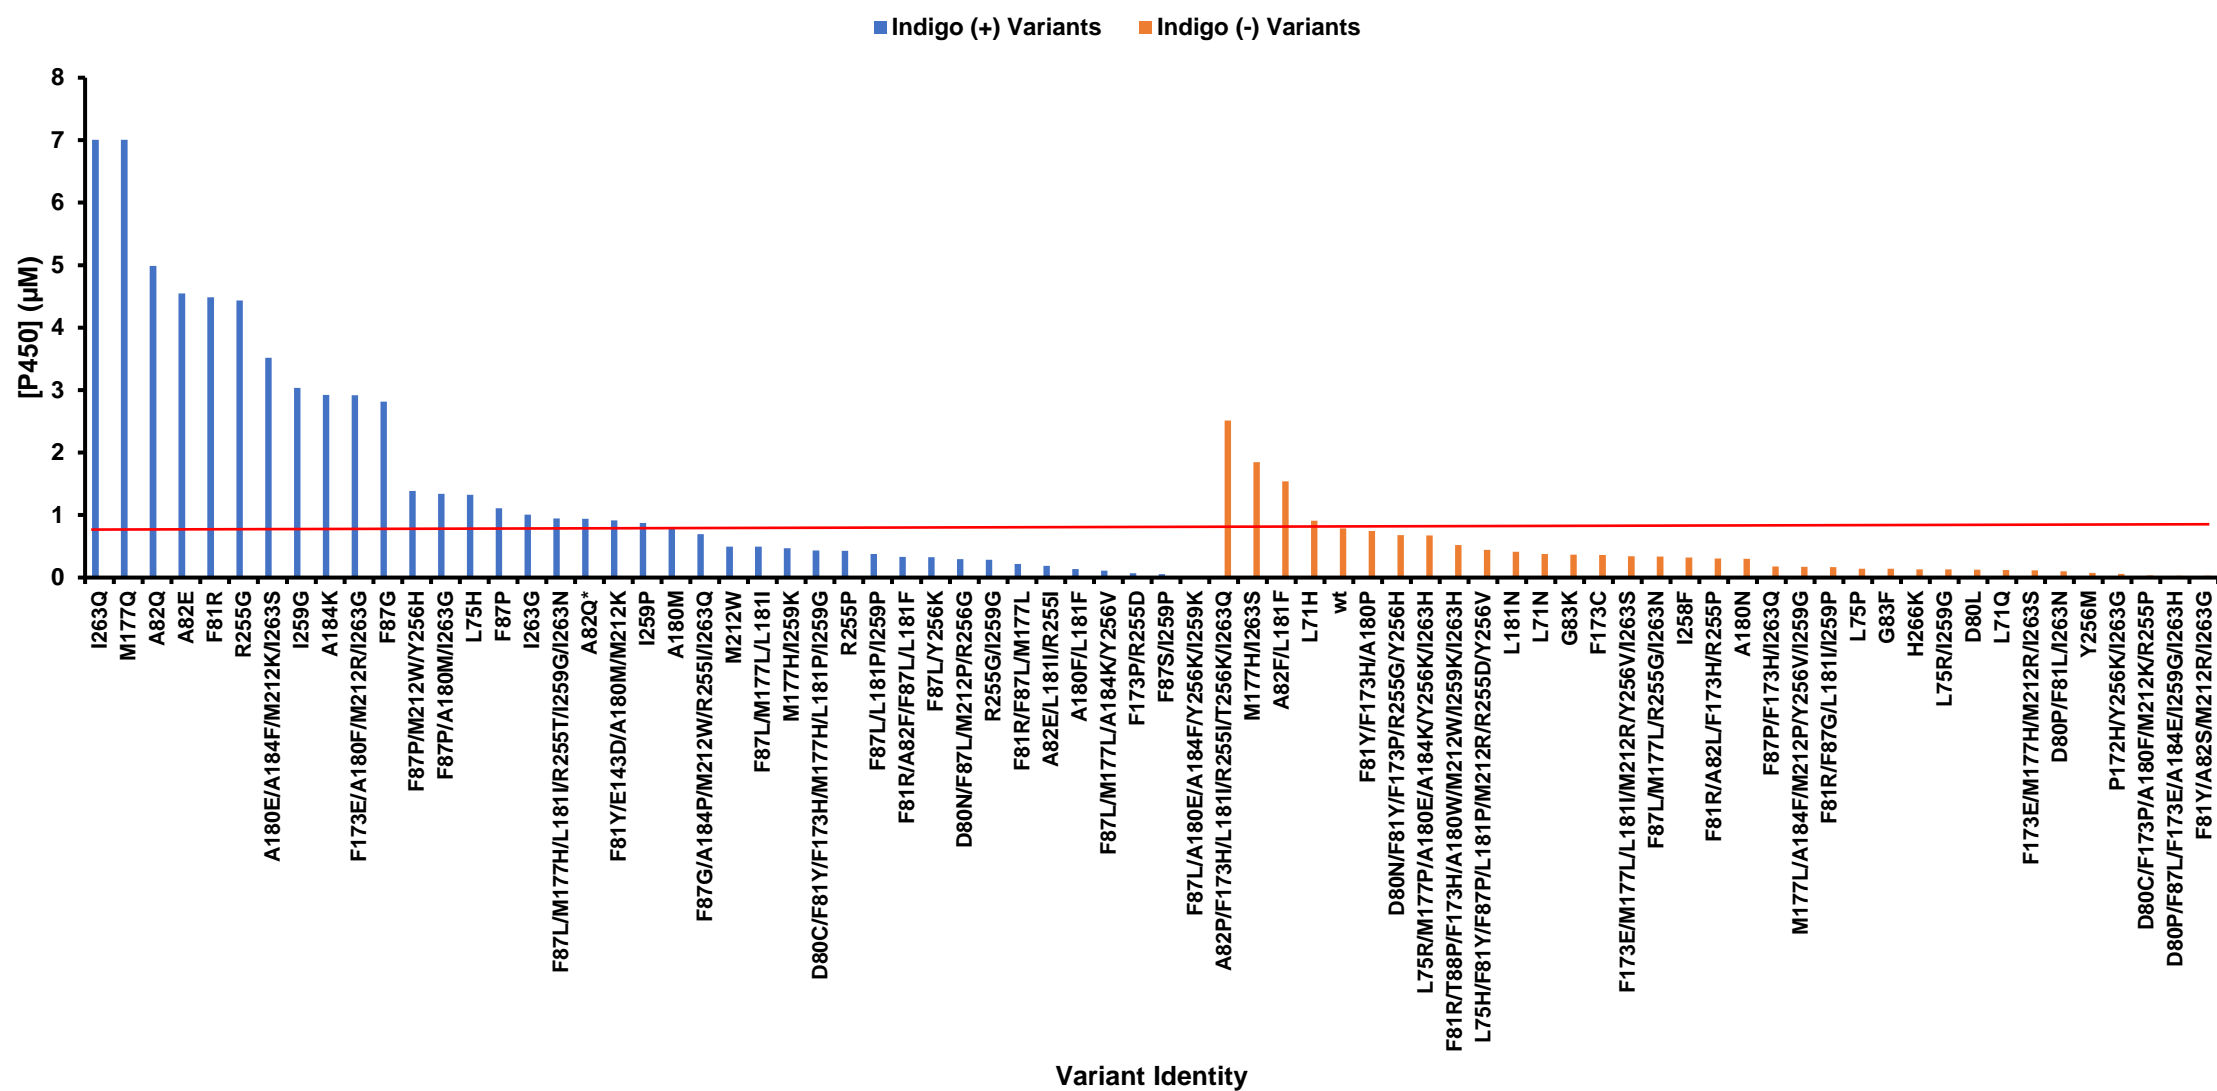

**Supplementary Figure 16.** Enzyme concentration of indigo (+) (blue) or indigo (-) (orange) P450 BM3 variants. Wild-type enzyme concentration is represented with a red line. Expression was determined in at least duplicate; for wild-type, n=8.

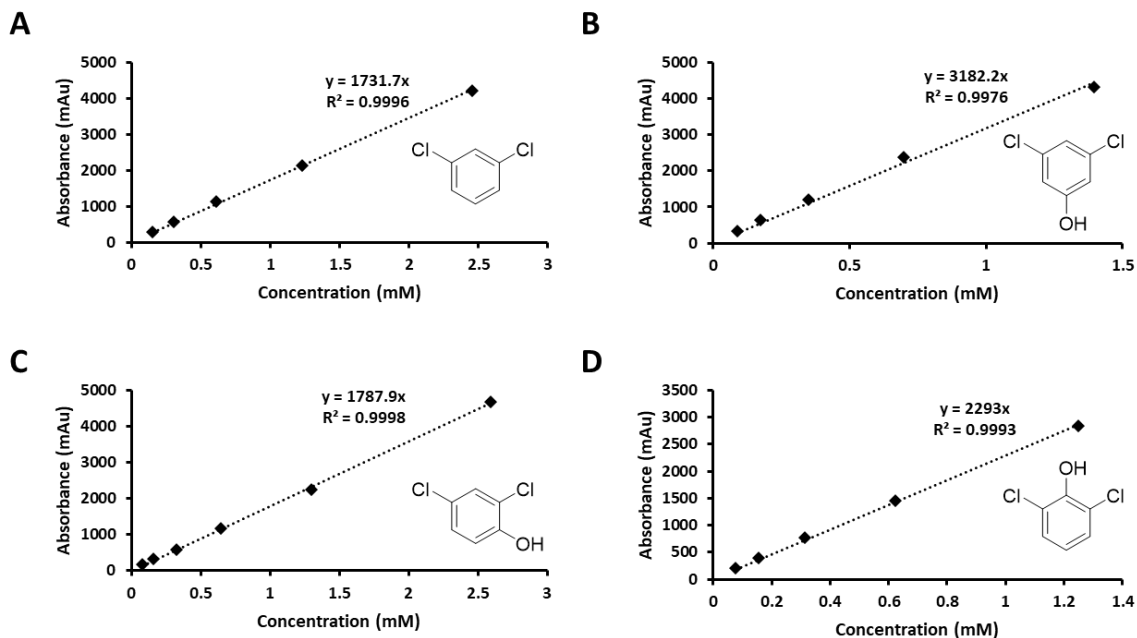

**Supplementary Figure 17.** Calibration curves of 1,3-dichlorobenzene (**12**) (A), 3,5-dichlorophenol (**12a**) (B), 2,4-dichlorophenol (**12b**) (C) and 2,6-dichlorophenol (**12c**) (D). Calibration curves were prepared by LC-MS injection of known concentrations and integration of peaks at 214.4 nm. Integration values were plotted against concentration to generate calibration curves.

## References:

1. J. A. O'Hanlon, X. Ren, M. Morris, L. L. Wong and J. Robertson, *Org Biomol Chem*, 2017, **15**, 8780-8787.
2. C. J. Whitehouse, S. G. Bell, H. G. Tufton, R. J. Kenny, L. C. Ogilvie and L. L. Wong, *Chem Commun (Camb)*, 2008, DOI: 10.1039/b718124h, 966-968.
3. C. J. Whitehouse, W. Yang, J. A. Yorke, B. C. Rowlatt, A. J. Strong, C. F. Blanford, S. G. Bell, M. Bartlam, L. L. Wong and Z. Rao, *Chembiochem*, 2010, **11**, 2549-2556.
4. A. Dennig, N. Lulsdorf, H. Liu and U. Schwaneberg, *Angew Chem Int Ed Engl*, 2013, **52**, 8459-8462.
5. S. D. Munday, O. Shoji, Y. Watanabe, L. L. Wong and S. G. Bell, *Chem Commun (Camb)*, 2016, **52**, 1036-1039.
6. S. D. Munday, S. Dezvarei, I. C. K. Lau and S. G. Bell, *ChemCatChem*, 2017, **9**, 2512-2522.
7. S. D. Munday, S. Dezvarei and S. G. Bell, *ChemCatChem*, 2016, **8**, 2789-2796.
8. M. Karasawa, K. Yonemura, J. K. Stanfield, K. Suzuki and O. Shoji, *Angew Chem Int Ed Engl*, 2022, **61**, e202111612.
9. S. Dezvarei, O. Shoji, Y. Watanabe and S. G. Bell, *Catalysis Communications*, 2019, **124**, 97-102.
10. K. Suzuki, J. K. Stanfield, O. Shoji, S. Yanagisawa, H. Sugimoto, Y. Shiro and Y. Watanabe, *Catalysis Science & Technology*, 2017, **7**, 3332-3338.
11. C. J. C. Whitehouse, W. Yang, J. A. Yorke, H. G. Tufton, L. C. I. Ogilvie, S. G. Bell, W. Zhou, M. Bartlam, Z. Raob and L.-L. Wong, *Dalton Trans*, 2011, **40**, 10383-10396.
12. J. Ikebe, M. Suzuki, A. Komori, K. Kobayashi and T. Kameda, *Sci Rep*, 2021, **11**, 19004.
13. A. Dennig, E. Busto, W. Kroutil and K. Faber, *ACS Catalysis*, 2015, **5**, 7503-7506.
14. C. J. Whitehouse, S. G. Bell and L. L. Wong, *Chemistry*, 2008, **14**, 10905-10908.
15. O. Rousseau, M. C. C. J. C. Ebert, D. Quaglia, A. Fendri, A. H. Parisien, J. N. Besna, S. Iyathurai and J. N. Pelletier, *ChemCatChem*, 2019, **12**, 837-845.
16. L. Ma, T. Sun, Y. Liu, Y. Zhao, X. Liu, Y. Li, X. Chen, L. Cao, Q. Kang, J. Guo, L. Du, W. Wang and S. Li, *Synthetic and Systems Biotechnology*, 2023, **8**, 452-461.
17. W. C. Huang, A. C. Westlake, J. D. Marechal, M. G. Joyce, P. C. Moody and G. C. Roberts, *J Mol Biol*, 2007, **373**, 633-651.
18. W. C. Huang, P. M. Cullis, E. L. Raven and G. C. Roberts, *Metallomics*, 2011, **3**, 410-416.
19. L. Ma, F. Li, X. Zhang, H. Chen, Q. Huang, J. Su, X. Liu, T. Sun, B. Fang, K. Liu, D. Tang, D. Wu, W. Zhang, L. Du and S. Li, *Sci China Life Sci*, 2022, **65**, 550-560.
20. J. Mendoza-Avila, K. Chauhan and R. Vazquez-Duhalt, *Dyes and Pigments*, 2020, **178**, 108384.
21. Y. Li, Y. Lin, F. Wang, J. Wang, O. Shoji and J. Xu, *Int J Mol Sci*, 2023, **24**.
22. F. Kong, J. Chen, X. Qin, C. Liu, Y. Jiang, L. Ma, H. Xu, S. Li and Z. Cong, *ChemCatChem*, 2022, **14**, e202201151.
23. Q. S. Li, J. Ogawa, R. D. Schmid and S. Shimizu, *Biosci Biotechnol Biochem*, 2005, **69**, 293-300.
24. Q.-S. Li, U. Schwaneberg, P. Fischer and R. D. Schmid, *Chemistry – A European Journal*, 2000, **6**, 1531-1536.
25. S. H. Park, D. H. Kim, D. Kim, D. H. Kim, H. C. Jung, J. G. Pan, T. Ahn, D. Kim and C. H. Yun, *Drug Metab Dispos*, 2010, **38**, 732-739.
26. S. Meng, Z. Li, Y. Ji, A. J. Ruff, L. Liu, M. D. Davari and U. Schwaneberg, *Chinese Journal of Catalysis*, 2023, **49**, 81-90.
27. Z. Pengpai, H. Sheng, M. Lehe, L. Yinlin, J. Zhihua and H. Guixiang, *Appl Biochem Biotechnol*, 2013, **171**, 93-103.
28. H. M. Li, L. H. Mei, V. B. Urlacher and R. D. Schmid, *Appl Biochem Biotechnol*, 2008, **144**, 27-36.
